# Supplementary material for: Genome-wide Survey of the GATA Gene Family in Camptothecin-producing Plant Ophiorrhiza Pumila
Source: Research Square preprint supplement (doi:10.21203/rs.3.rs-385244/v1), 2021-04-06
Supplement: Supplementary file 1 [file a21e9568d68d553986492798.xlsx]

## Sheet: p value
Table S4 Correlation analysis results of p value
	ASA	TSB	TDC	HMGS	HMGR	MDC	MK	AACT	PMK	IPPI	GPPS	HDR	DXR	DXS	CMK	CMS	MECS	HDS	STR	G10H	10-HGO	8-HGO	GES	IS	IO	7-DLH	7-DLGT	CPR	LAMT	SLS	OpGATA12	OpGATA8	OpGATA9	OpGATA16	OpGATA2	OpGATA3	OpGATA4	OpGATA5	OpGATA6	OpGATA7	OpGATA15	OpGATA14	OpGATA13	OpGATA1	OpGATA11	OpGATA10	OpGATA18	OpGATA17
ASA	NA	0.19892	0.125632	0.164918	0.192009	0.0144993	0.016829	0.056978	0.0147983	0.27493	0.0950789	0.315609	0.101098	0.020403	0.329613	0.0356906	0.0768923	0.174478	0.121294	0.109134	0.0811363	0.385599	0.308853	0.446716	0.590684	0.690082	0.204043	0.943381	0.0319133	0.0165733	0.0335636	0.734896	0.0150104	0.479837	0.457683	1	0.405757	0.202986	0.107798	0.629549	0.0529661	0.115869	0.0691378	0.0361428	0.628347	0.381839	0.637958	0.349329
TSB	0.19892	NA	0.0637157	0.471271	0.25657	0.0939256	0.296155	0.220186	0.00980273	0.301402	0.382604	0.652128	0.281115	0.353851	0.567206	0.250584	0.432312	0.459039	0.043906	0.39754	0.847144	0.505584	0.553408	0.0365978	0.167111	0.816497	0.639658	0.896233	0.0286225	0.247894	0.181852	0.581679	0.0476188	0.653057	0.108774	1	0.943403	0.362704	0.284388	0.988181	0.0794936	0.303253	0.27249	0.170948	0.7995	0.859258	0.279462	0.852662
TDC	0.125632	0.0637157	NA	0.00631901	0.0045851	0.0323092	0.239435	0.00659463	0.00114756	0.00275335	0.0228964	0.058048	0.0120526	0.520124	0.0103191	0.449356	0.859663	0.00880826	2.14375e-05	0.00957676	0.403973	0.00666905	0.225923	0.0100872	0.00865368	0.14362	0.0525943	0.0774014	0.000175888	0.0182187	0.188005	0.0451217	0.432215	0.700783	0.706066	1	0.319268	0.672249	0.759731	0.0877363	0.000247149	0.0779989	0.262183	0.00117787	0.557592	0.427975	0.177292	0.316886
HMGS	0.164918	0.471271	0.00631901	NA	0.0278631	0.0458344	0.464056	0.000494773	0.0453535	0.000149023	0.108838	0.00171297	0.000145736	0.506419	0.000188243	0.624621	0.840718	9.27015e-05	0.0179639	0.0012294	0.0511464	0.002042	0.373792	0.175322	0.128438	0.0648181	0.000648106	0.0237359	0.0456946	0.00208425	0.262942	0.018651	0.849864	0.301181	0.245124	1	0.198186	0.599113	0.481623	0.0717423	0.00686941	0.231523	0.45946	0.00389888	0.149929	0.542581	0.218474	0.298835
HMGR	0.192009	0.25657	0.0045851	0.0278631	NA	0.27492	0.295752	0.00408334	0.0295966	0.0100245	0.000268768	0.025348	0.0229941	0.721033	0.0245622	0.384761	0.484244	0.00623265	0.0142758	0.00121687	0.188829	0.00506462	0.381327	0.0318163	0.0506267	0.0437156	0.0283643	0.0604754	0.00664202	0.0209726	0.2132	0.0349736	0.457929	0.374831	0.598882	1	0.298486	0.36473	0.901974	0.133241	0.0011748	0.00754385	0.562615	0.0211898	0.45707	0.110476	0.222373	0.106308
MDC	0.0144993	0.0939256	0.0323092	0.0458344	0.27492	NA	0.11349	0.055292	0.00212406	0.0784506	0.353906	0.278349	0.0305928	0.0902379	0.155644	0.125009	0.463451	0.109113	0.0481262	0.133872	0.285569	0.241313	0.711554	0.44415	0.4881	0.871568	0.205482	0.652891	0.022221	0.0283563	0.0483234	0.351449	0.109072	0.808068	0.695982	1	0.976345	0.163886	0.469421	0.707486	0.0374892	0.348195	0.0472332	0.0120687	0.810617	0.365302	0.554939	0.496957
MK	0.016829	0.296155	0.239435	0.464056	0.295752	0.11349	NA	0.330451	0.0974631	0.743583	0.107436	0.966589	0.552025	0.00878493	0.78963	0.0212831	0.0254597	0.66177	0.120333	0.498492	0.392404	0.94799	0.742696	0.322493	0.441011	0.648942	0.433691	0.854196	0.0688093	0.157221	0.0534262	0.513018	0.063807	0.0626469	0.427185	1	0.143932	0.292512	0.122734	0.668656	0.0951279	0.571564	0.679837	0.276065	0.0893416	0.364619	0.408552	0.492152
AACT	0.056978	0.220186	0.00659463	0.000494773	0.00408334	0.055292	0.330451	NA	0.0137466	0.000511597	0.0291203	0.000703641	2.17327e-05	0.358822	0.00348647	0.306094	0.612674	5.00271e-05	0.0189085	1.72688e-05	0.0238386	0.00357553	0.653141	0.105422	0.166495	0.127907	0.000593579	0.10552	0.0162493	6.06162e-05	0.113495	0.0235383	0.34427	0.315832	0.629302	1	0.352308	0.802271	0.958213	0.258704	0.00139253	0.0480327	0.339149	0.00298698	0.219043	0.473019	0.118384	0.355028
PMK	0.0147983	0.00980273	0.00114756	0.0453535	0.0295966	0.00212406	0.0974631	0.0137466	NA	0.031045	0.0542625	0.165521	0.0209975	0.197503	0.0936992	0.124904	0.340326	0.0479689	0.00299187	0.0353906	0.379816	0.0801837	0.571333	0.0636658	0.117186	0.698263	0.155642	0.463881	0.000102247	0.015321	0.0478581	0.173989	0.0570457	0.96193	0.570698	1	0.793745	0.490626	0.462821	0.512089	0.00146009	0.0545297	0.0672686	0.00288894	0.847056	0.980855	0.254609	0.987094
IPPI	0.27493	0.301402	0.00275335	0.000149023	0.0100245	0.0784506	0.743583	0.000511597	0.031045	NA	0.0784053	0.000730102	8.06215e-05	0.723729	0.00106943	0.61537	0.84049	1.47901e-05	0.0171909	0.000294246	0.0995975	0.000340443	0.243382	0.101674	0.117997	0.0485042	0.00331102	0.0545816	0.0264828	0.00466513	0.222706	0.00146852	0.744496	0.153481	0.257437	1	0.121444	0.462327	0.504051	0.0653436	0.00948211	0.0973712	0.309402	0.0015424	0.0812572	0.223897	0.049018	0.134604
GPPS	0.0950789	0.382604	0.0228964	0.108838	0.000268768	0.353906	0.107436	0.0291203	0.0542625	0.0784053	NA	0.125062	0.11011	0.4171	0.131065	0.192	0.199993	0.046492	0.0303241	0.0123655	0.163692	0.0528356	0.804775	0.0525389	0.0898896	0.169931	0.0809076	0.187449	0.007288	0.0374001	0.131108	0.208139	0.283488	0.866837	0.664247	1	0.808051	0.447725	0.739388	0.39844	0.00924252	0.00883516	0.491502	0.0342187	0.962263	0.183082	0.40068	0.223807
HDR	0.315609	0.652128	0.058048	0.00171297	0.025348	0.278349	0.966589	0.000703641	0.165521	0.000730102	0.125062	NA	0.000418695	0.929142	0.00132025	0.869334	0.769383	2.82276e-05	0.140529	0.000184969	0.0260061	0.000728487	0.665774	0.281185	0.291005	0.0333504	0.00124857	0.0629807	0.170758	0.00807162	0.456501	0.00225401	0.929717	0.0471465	0.240343	1	0.0968797	0.362058	0.490886	0.140347	0.0472513	0.0862322	0.494342	0.0259421	0.0262748	0.222991	0.0455852	0.163808
DXR	0.101098	0.281115	0.0120526	0.000145736	0.0229941	0.0305928	0.552025	2.17327e-05	0.0209975	8.06215e-05	0.11011	0.000418695	NA	0.435674	0.00279882	0.392193	0.854657	2.76293e-05	0.0416249	0.000207994	0.0280088	0.00372956	0.533584	0.224882	0.291391	0.160201	0.00142458	0.131175	0.0386636	0.000368565	0.130861	0.00952357	0.455154	0.20183	0.495739	1	0.257134	0.903212	0.887251	0.221177	0.0091581	0.0953515	0.233427	0.0023217	0.0965504	0.547661	0.0854557	0.403174
DXS	0.020403	0.353851	0.520124	0.506419	0.721033	0.0902379	0.00878493	0.358822	0.197503	0.723729	0.4171	0.929142	0.435674	NA	0.905783	0.00148261	0.0223408	0.679838	0.336129	0.569005	0.1364	0.750958	0.40774	0.618905	0.909337	0.258523	0.340571	0.491801	0.207002	0.0925258	0.00385666	0.447511	0.0197981	0.0757661	0.543531	1	0.0295173	0.124367	0.0293096	0.19338	0.370771	0.905003	0.395901	0.240737	0.172081	0.258577	0.837755	0.36705
CMK	0.329613	0.567206	0.0103191	0.000188243	0.0245622	0.155644	0.78963	0.00348647	0.0936992	0.00106943	0.131065	0.00132025	0.00279882	0.905783	NA	0.807237	0.459677	0.000432351	0.0352082	0.00300819	0.171434	7.36591e-05	0.342322	0.179113	0.0621426	0.01354	0.00886669	0.00338201	0.0950539	0.0288073	0.742724	0.00451677	0.770088	0.126741	0.255123	1	0.0370254	0.339089	0.20562	0.0141767	0.0115031	0.16461	0.599529	0.0236695	0.0662399	0.395455	0.195533	0.235175
CMS	0.0356906	0.250584	0.449356	0.624621	0.384761	0.125009	0.0212831	0.306094	0.124904	0.61537	0.192	0.869334	0.392193	0.00148261	0.807237	NA	0.000641644	0.598949	0.374423	0.413515	0.166897	0.889218	0.640436	0.586573	0.791475	0.33576	0.418385	0.416715	0.120939	0.100375	6.75992e-05	0.727104	0.00211817	0.239484	0.457961	1	0.0672007	0.147874	0.00729964	0.2197	0.298219	0.398841	0.265197	0.212102	0.28132	0.65442	0.953286	0.631298
MECS	0.0768923	0.432312	0.859663	0.840718	0.484244	0.463451	0.0254597	0.612674	0.340326	0.84049	0.199993	0.769383	0.854657	0.0223408	0.459677	0.000641644	NA	0.974723	0.750854	0.704442	0.326012	0.573429	0.358632	0.820721	0.609069	0.259579	0.802031	0.296358	0.312282	0.340415	0.017364	0.409084	0.0044745	0.197283	0.226954	1	0.036409	0.163016	0.00131649	0.103393	0.505618	0.354076	0.522437	0.632979	0.137152	0.634049	0.662667	0.488642
HDS	0.174478	0.459039	0.00880826	9.27015e-05	0.00623265	0.109113	0.66177	5.00271e-05	0.0479689	1.47901e-05	0.046492	2.82276e-05	2.76293e-05	0.679838	0.000432351	0.598949	0.974723	NA	0.0365363	3.65145e-06	0.0312181	0.000155689	0.497995	0.163306	0.166677	0.0420623	0.000769478	0.0455404	0.0416681	0.00156939	0.247227	0.00251651	0.719268	0.132757	0.25677	1	0.14851	0.455109	0.582353	0.102335	0.00886768	0.0555088	0.336642	0.00273888	0.0810919	0.257494	0.0683214	0.179436
STR	0.121294	0.043906	2.14375e-05	0.0179639	0.0142758	0.0481262	0.120333	0.0189085	0.00299187	0.0171909	0.0303241	0.140529	0.0416249	0.336129	0.0352082	0.374423	0.750854	0.0365363	NA	0.0356614	0.484226	0.0377227	0.274868	0.00189667	0.0029181	0.222026	0.0661184	0.112445	0.000263809	0.0265352	0.170172	0.174063	0.384429	0.883054	0.838393	1	0.571498	0.712128	0.889381	0.160916	0.000621003	0.192722	0.433322	0.00579762	0.93814	0.56054	0.302691	0.376757
G10H	0.109134	0.39754	0.00957676	0.0012294	0.00121687	0.133872	0.498492	1.72688e-05	0.0353906	0.000294246	0.0123655	0.000184969	0.000207994	0.569005	0.00300819	0.413515	0.704442	3.65145e-06	0.0356614	NA	0.0220293	0.000607703	0.651525	0.129704	0.172879	0.0606236	0.00128252	0.0782363	0.0238849	0.000796885	0.16678	0.00705459	0.495999	0.187896	0.371831	1	0.25093	0.492097	0.840146	0.185021	0.00516919	0.0174592	0.312418	0.00285446	0.157899	0.221439	0.073155	0.188723
10-HGO	0.0811363	0.847144	0.403973	0.0511464	0.188829	0.285569	0.392404	0.0238386	0.379816	0.0995975	0.163692	0.0260061	0.0280088	0.1364	0.171434	0.166897	0.326012	0.0312181	0.484226	0.0220293	NA	0.19397	0.457096	0.841917	0.910865	0.505399	0.00612613	0.517791	0.360832	0.00544659	0.0889588	0.31218	0.409588	0.55172	0.342528	1	0.895082	0.978984	0.593715	0.968446	0.234207	0.267049	0.477307	0.0885874	0.452732	0.761552	0.388505	0.665726
8-HGO	0.385599	0.505584	0.00666905	0.002042	0.00506462	0.241313	0.94799	0.00357553	0.0801837	0.000340443	0.0528356	0.000728487	0.00372956	0.750958	7.36591e-05	0.889218	0.573429	0.000155689	0.0377227	0.000607703	0.19397	NA	0.325618	0.124388	0.0593196	0.00780175	0.017608	0.0112313	0.0585718	0.0353986	0.649103	0.000248309	0.897202	0.0694133	0.226342	1	0.0287638	0.212451	0.249963	0.0172183	0.0136947	0.0407141	0.427019	0.0132424	0.054685	0.1365	0.0672626	0.10596
GES	0.308853	0.553408	0.225923	0.373792	0.381327	0.711554	0.742696	0.653141	0.571333	0.243382	0.804775	0.665774	0.533584	0.40774	0.342322	0.640436	0.358632	0.497995	0.274868	0.651525	0.457096	0.325618	NA	0.314268	0.237258	0.134362	0.628852	0.129199	0.497552	0.932189	0.941057	0.226025	0.3765	0.390851	0.439009	1	0.097787	0.386117	0.148587	0.0212325	0.376049	0.896763	0.549596	0.661187	0.340539	0.260852	0.902463	0.101663
IS	0.446716	0.0365978	0.0100872	0.175322	0.0318163	0.44415	0.322493	0.105422	0.0636658	0.101674	0.0525389	0.281185	0.224882	0.618905	0.179113	0.586573	0.820721	0.163306	0.00189667	0.129704	0.841917	0.124388	0.314268	NA	0.00106403	0.198991	0.177994	0.238911	0.0137288	0.154103	0.373856	0.31534	0.496708	0.856818	0.981235	1	0.632716	0.351424	0.886894	0.283355	0.0244224	0.264186	0.881512	0.0939121	0.874142	0.228969	0.21181	0.158678
IO	0.590684	0.167111	0.00865368	0.128438	0.0506267	0.4881	0.441011	0.166495	0.117186	0.117997	0.0898896	0.291005	0.291391	0.909337	0.0621426	0.791475	0.609069	0.166677	0.0029181	0.172879	0.910865	0.0593196	0.237258	0.00106403	NA	0.0728691	0.255535	0.0432106	0.0386661	0.303556	0.930373	0.239755	0.917256	0.972743	0.708074	1	0.272889	0.193395	0.323529	0.0532407	0.0269198	0.343979	0.984479	0.138004	0.940946	0.30361	0.404598	0.193208
7-DLH	0.690082	0.816497	0.14362	0.0648181	0.0437156	0.871568	0.648942	0.127907	0.698263	0.0485042	0.169931	0.0333504	0.160201	0.258523	0.01354	0.33576	0.259579	0.0420623	0.222026	0.0606236	0.505399	0.00780175	0.134362	0.198991	0.0728691	NA	0.0698028	0.000572092	0.454779	0.350872	0.641764	0.0205791	0.179951	0.0545361	0.0587859	1	0.00966691	0.00794303	0.0285342	0.00188829	0.158388	0.341497	0.486699	0.342424	0.0816072	0.0224994	0.364548	0.0046272
7-DLGT	0.204043	0.639658	0.0525943	0.000648106	0.0283643	0.205482	0.433691	0.000593579	0.155642	0.00331102	0.0809076	0.00124857	0.00142458	0.340571	0.00886669	0.418385	0.802031	0.000769478	0.0661184	0.00128252	0.00612613	0.017608	0.628852	0.177994	0.255535	0.0698028	NA	0.0651959	0.115696	0.000732331	0.176143	0.0695417	0.744384	0.346396	0.230553	1	0.422435	0.477265	0.750009	0.2473	0.0249064	0.279552	0.827308	0.0261115	0.230437	0.376	0.238957	0.178391
CPR	0.943381	0.896233	0.0774014	0.0237359	0.0604754	0.652891	0.854196	0.10552	0.463881	0.0545816	0.187449	0.0629807	0.131175	0.491801	0.00338201	0.416715	0.296358	0.0455404	0.112445	0.0782363	0.517791	0.0112313	0.129199	0.238911	0.0432106	0.000572092	0.0651959	NA	0.324697	0.273807	0.703228	0.0608996	0.22217	0.201092	0.11978	1	0.0252071	0.0831518	0.0370472	0.000475755	0.06589	0.489949	0.538131	0.270585	0.183094	0.240786	0.778127	0.0853847
LAMT	0.0319133	0.0286225	0.000175888	0.0456946	0.00664202	0.022221	0.0688093	0.0162493	0.000102247	0.0264828	0.007288	0.170758	0.0386636	0.207002	0.0950539	0.120939	0.312282	0.0416681	0.000263809	0.0238849	0.360832	0.0585718	0.497552	0.0137288	0.0386661	0.454779	0.115696	0.324697	NA	0.0158894	0.0434729	0.183994	0.103061	0.847214	0.906386	1	0.843421	0.942727	0.604423	0.397383	0.000795235	0.0417388	0.140838	0.00151656	0.946194	0.600367	0.248947	0.570783
SLS	0.0165733	0.247894	0.0182187	0.00208425	0.0209726	0.0283563	0.157221	6.06162e-05	0.015321	0.00466513	0.0374001	0.00807162	0.000368565	0.0925258	0.0288073	0.100375	0.340415	0.00156939	0.0265352	0.000796885	0.00544659	0.0353986	0.932189	0.154103	0.303556	0.350872	0.000732331	0.273807	0.0158894	NA	0.0234639	0.115603	0.174829	0.675085	0.661535	1	0.820356	0.914864	0.604673	0.575047	0.00643071	0.104227	0.254996	0.00173233	0.486737	0.719184	0.18435	0.559521
OpGATA12	0.0335636	0.181852	0.188005	0.262942	0.2132	0.0483234	0.0534262	0.113495	0.0478581	0.222706	0.131108	0.456501	0.130861	0.00385666	0.742724	6.75992e-05	0.017364	0.247227	0.170172	0.16678	0.0889588	0.649103	0.941057	0.373856	0.930373	0.641764	0.176143	0.703228	0.0434729	0.0234639	NA	0.770702	0.00825942	0.486214	0.798704	1	0.236366	0.293041	0.0574422	0.509021	0.153044	0.29248	0.156806	0.0488607	0.614635	0.938803	0.52467	0.973213
OpGATA8	0.734896	0.581679	0.0451217	0.018651	0.0349736	0.351449	0.513018	0.0235383	0.173989	0.00146852	0.208139	0.00225401	0.00952357	0.447511	0.00451677	0.727104	0.409084	0.00251651	0.174063	0.00705459	0.31218	0.000248309	0.226025	0.31534	0.239755	0.0205791	0.0695417	0.0608996	0.183994	0.115603	0.770702	NA	0.781972	0.00747607	0.223194	1	0.00795046	0.256263	0.219227	0.0276746	0.0946178	0.0603393	0.349984	0.0465221	0.00504881	0.0912657	0.0260585	0.093451
OpGATA9	0.0150104	0.0476188	0.432215	0.849864	0.457929	0.109072	0.063807	0.34427	0.0570457	0.744496	0.283488	0.929717	0.455154	0.0197981	0.770088	0.00211817	0.0044745	0.719268	0.384429	0.495999	0.409588	0.897202	0.3765	0.496708	0.917256	0.179951	0.744384	0.22217	0.103061	0.174829	0.00825942	0.781972	NA	0.280465	0.0788675	1	0.109641	0.0550524	0.000837067	0.12939	0.298887	0.207542	0.0910289	0.244591	0.314458	0.45372	0.618777	0.298408
OpGATA16	0.479837	0.653057	0.700783	0.301181	0.374831	0.808068	0.0626469	0.315832	0.96193	0.153481	0.866837	0.0471465	0.20183	0.0757661	0.126741	0.239484	0.197283	0.132757	0.883054	0.187896	0.55172	0.0694133	0.390851	0.856818	0.972743	0.0545361	0.346396	0.201092	0.847214	0.675085	0.486214	0.00747607	0.280465	NA	0.248998	1	0.00335766	0.230602	0.135669	0.112094	0.734058	0.315795	0.945848	0.684417	4.05084e-05	0.120848	0.155436	0.150427
OpGATA2	0.457683	0.108774	0.706066	0.245124	0.598882	0.695982	0.427185	0.629302	0.570698	0.257437	0.664247	0.240343	0.495739	0.543531	0.255123	0.457961	0.226954	0.25677	0.838393	0.371831	0.342528	0.226342	0.439009	0.981235	0.708074	0.0587859	0.230553	0.11978	0.906386	0.661535	0.798704	0.223194	0.0788675	0.248998	NA	1	0.256465	0.0240862	0.0376941	0.115739	0.98908	0.941877	0.722991	0.511781	0.241497	0.0974809	0.572586	0.0428785
OpGATA3	1	1	1	1	1	1	1	1	1	1	1	1	1	1	1	1	1	1	1	1	1	1	1	1	1	1	1	1	1	1	1	1	1	1	1	NA	1	1	1	1	1	1	1	1	1	1	1	1
OpGATA4	0.405757	0.943403	0.319268	0.198186	0.298486	0.976345	0.143932	0.352308	0.793745	0.121444	0.808051	0.0968797	0.257134	0.0295173	0.0370254	0.0672007	0.036409	0.14851	0.571498	0.25093	0.895082	0.0287638	0.097787	0.632716	0.272889	0.00966691	0.422435	0.0252071	0.843421	0.820356	0.236366	0.00795046	0.109641	0.00335766	0.256465	1	NA	0.117794	0.0112426	0.00256311	0.430214	0.472669	0.833812	0.607748	0.00383588	0.158166	0.290192	0.120248
OpGATA5	0.202986	0.362704	0.672249	0.599113	0.36473	0.163886	0.292512	0.802271	0.490626	0.462327	0.447725	0.362058	0.903212	0.124367	0.339089	0.147874	0.163016	0.455109	0.712128	0.492097	0.978984	0.212451	0.386117	0.351424	0.193395	0.00794303	0.477265	0.0831518	0.942727	0.914864	0.293041	0.256263	0.0550524	0.230602	0.0240862	1	0.117794	NA	0.0207658	0.0726713	0.890591	0.760419	0.285399	0.906785	0.387366	0.00449598	0.438394	0.00261506
OpGATA6	0.107798	0.284388	0.759731	0.481623	0.901974	0.469421	0.122734	0.958213	0.462821	0.504051	0.739388	0.490886	0.887251	0.0293096	0.20562	0.00729964	0.00131649	0.582353	0.889381	0.840146	0.593715	0.249963	0.148587	0.886894	0.323529	0.0285342	0.750009	0.0370472	0.604423	0.604673	0.0574422	0.219227	0.000837067	0.135669	0.0376941	1	0.0112426	0.0207658	NA	0.00707715	0.938181	0.640137	0.346889	0.912805	0.127446	0.233339	0.79779	0.120024
OpGATA7	0.629549	0.988181	0.0877363	0.0717423	0.133241	0.707486	0.668656	0.258704	0.512089	0.0653436	0.39844	0.140347	0.221177	0.19338	0.0141767	0.2197	0.103393	0.102335	0.160916	0.185021	0.968446	0.0172183	0.0212325	0.283355	0.0532407	0.00188829	0.2473	0.000475755	0.397383	0.575047	0.509021	0.0276746	0.12939	0.112094	0.115739	1	0.00256311	0.0726713	0.00707715	NA	0.161619	0.566834	0.716516	0.33185	0.0982412	0.158886	0.588915	0.0615089
OpGATA15	0.0529661	0.0794936	0.000247149	0.00686941	0.0011748	0.0374892	0.0951279	0.00139253	0.00146009	0.00948211	0.00924252	0.0472513	0.0091581	0.370771	0.0115031	0.298219	0.505618	0.00886768	0.000621003	0.00516919	0.234207	0.0136947	0.376049	0.0244224	0.0269198	0.158388	0.0249064	0.06589	0.000795235	0.00643071	0.153044	0.0946178	0.298887	0.734058	0.98908	1	0.430214	0.890591	0.938181	0.161619	NA	0.0580903	0.456753	0.00861899	0.630941	0.612166	0.395437	0.456899
OpGATA14	0.115869	0.303253	0.0779989	0.231523	0.00754385	0.348195	0.571564	0.0480327	0.0545297	0.0973712	0.00883516	0.0862322	0.0953515	0.905003	0.16461	0.398841	0.354076	0.0555088	0.192722	0.0174592	0.267049	0.0407141	0.896763	0.264186	0.343979	0.341497	0.279552	0.489949	0.0417388	0.104227	0.29248	0.0603393	0.207542	0.315795	0.941877	1	0.472669	0.760419	0.640137	0.566834	0.0580903	NA	0.104621	0.0552178	0.468569	0.242452	0.103162	0.503406
OpGATA13	0.0691378	0.27249	0.262183	0.45946	0.562615	0.0472332	0.679837	0.339149	0.0672686	0.309402	0.491502	0.494342	0.233427	0.395901	0.599529	0.265197	0.522437	0.336642	0.433322	0.312418	0.477307	0.427019	0.549596	0.881512	0.984479	0.486699	0.827308	0.538131	0.140838	0.254996	0.156806	0.349984	0.0910289	0.945848	0.722991	1	0.833812	0.285399	0.346889	0.716516	0.456753	0.104621	NA	0.0505091	0.795403	0.731277	0.130644	0.437157
OpGATA1	0.0361428	0.170948	0.00117787	0.00389888	0.0211898	0.0120687	0.276065	0.00298698	0.00288894	0.0015424	0.0342187	0.0259421	0.0023217	0.240737	0.0236695	0.212102	0.632979	0.00273888	0.00579762	0.00285446	0.0885874	0.0132424	0.661187	0.0939121	0.138004	0.342424	0.0261115	0.270585	0.00151656	0.00173233	0.0488607	0.0465221	0.244591	0.684417	0.511781	1	0.607748	0.906785	0.912805	0.33185	0.00861899	0.0552178	0.0505091	NA	0.495978	0.540952	0.071391	0.492638
OpGATA11	0.628347	0.7995	0.557592	0.149929	0.45707	0.810617	0.0893416	0.219043	0.847056	0.0812572	0.962263	0.0262748	0.0965504	0.172081	0.0662399	0.28132	0.137152	0.0810919	0.93814	0.157899	0.452732	0.054685	0.340539	0.874142	0.940946	0.0816072	0.230437	0.183094	0.946194	0.486737	0.614635	0.00504881	0.314458	4.05084e-05	0.241497	1	0.00383588	0.387366	0.127446	0.0982412	0.630941	0.468569	0.795403	0.495978	NA	0.279054	0.133669	0.246972
OpGATA10	0.381839	0.859258	0.427975	0.542581	0.110476	0.365302	0.364619	0.473019	0.980855	0.223897	0.183082	0.222991	0.547661	0.258577	0.395455	0.65442	0.634049	0.257494	0.56054	0.221439	0.761552	0.1365	0.260852	0.228969	0.30361	0.0224994	0.376	0.240786	0.600367	0.719184	0.938803	0.0912657	0.45372	0.120848	0.0974809	1	0.158166	0.00449598	0.233339	0.158886	0.612166	0.242452	0.731277	0.540952	0.279054	NA	0.140944	0.000140761
OpGATA18	0.637958	0.279462	0.177292	0.218474	0.222373	0.554939	0.408552	0.118384	0.254609	0.049018	0.40068	0.0455852	0.0854557	0.837755	0.195533	0.953286	0.662667	0.0683214	0.302691	0.073155	0.388505	0.0672626	0.902463	0.21181	0.404598	0.364548	0.238957	0.778127	0.248947	0.18435	0.52467	0.0260585	0.618777	0.155436	0.572586	1	0.290192	0.438394	0.79779	0.588915	0.395437	0.103162	0.130644	0.071391	0.133669	0.140944	NA	0.2502
OpGATA17	0.349329	0.852662	0.316886	0.298835	0.106308	0.496957	0.492152	0.355028	0.987094	0.134604	0.223807	0.163808	0.403174	0.36705	0.235175	0.631298	0.488642	0.179436	0.376757	0.188723	0.665726	0.10596	0.101663	0.158678	0.193208	0.0046272	0.178391	0.0853847	0.570783	0.559521	0.973213	0.093451	0.298408	0.150427	0.0428785	1	0.120248	0.00261506	0.120024	0.0615089	0.456899	0.503406	0.437157	0.492638	0.246972	0.000140761	0.2502	NA

## Sheet: r value
Table S4 Correlation analysis results of Pearson correlation coefficient
	ASA	TSB	TDC	HMGS	HMGR	MDC	MK	AACT	PMK	IPPI	GPPS	HDR	DXR	DXS	CMK	CMS	MECS	HDS	STR	G10H	10-HGO	8-HGO	GES	IS	IO	7-DLH	7-DLGT	CPR	LAMT	SLS	OpGATA12	OpGATA8	OpGATA9	OpGATA16	OpGATA2	OpGATA3	OpGATA4	OpGATA5	OpGATA6	OpGATA7	OpGATA15	OpGATA14	OpGATA13	OpGATA1	OpGATA11	OpGATA10	OpGATA18	OpGATA17
ASA	1	-0.472584	-0.54921	-0.505648	-0.479029	-0.773374	0.762756	-0.652134	-0.77195	-0.40857	0.58911	-0.378168	-0.580693	0.748227	-0.368167	0.700209	0.616726	-0.495989	-0.554489	-0.569918	-0.609948	-0.330124	0.383072	-0.291441	-0.208309	-0.155213	-0.467887	0.0278108	-0.710571	-0.763872	0.705951	0.132036	0.770952	-0.271456	-0.284755	9.28183e-09	-0.317076	-0.468851	-0.571676	0.187228	-0.660181	-0.561252	0.629739	0.699017	-0.187874	-0.332592	0.182725	-0.354437
TSB	-0.472584	1	0.63939	0.276567	0.423056	0.590759	-0.392439	0.4535	0.798903	0.388545	-0.332089	0.17518	0.403805	-0.351342	0.221278	-0.427898	-0.300331	0.283933	0.679908	0.322358	-0.0753891	0.256317	0.228992	0.697827	0.503405	0.0906965	0.181817	0.0510472	0.720271	0.430093	-0.488743	-0.213261	-0.671535	0.174687	0.570391	1.63563e-07	0.0277997	0.345337	0.401305	0.00580204	0.612545	0.387179	-0.410466	-0.49952	0.0992308	0.0693641	-0.405074	0.0726432
TDC	-0.54921	0.63939	1	0.823931	0.840115	0.709448	-0.437082	0.821649	0.894051	0.862708	-0.739065	0.650049	0.785837	-0.247907	0.795738	-0.289825	-0.0691629	0.805331	0.966717	0.800324	0.318218	0.821044	0.448528	0.797146	0.806373	-0.528399	0.660946	-0.615901	0.938792	0.756884	-0.482823	-0.677118	-0.300392	-0.149642	-0.146901	0	-0.375534	-0.164552	-0.119349	0.59983	0.932423	0.614937	-0.418572	-0.893233	-0.226645	-0.303034	-0.493204	-0.377247
HMGS	-0.505648	0.276567	0.823931	1	0.722612	0.675505	-0.280902	0.917242	0.676591	0.941671	-0.570307	0.880745	0.942047	-0.255832	0.937571	-0.189876	0.078591	0.949177	0.757937	0.891877	0.663959	0.874373	0.337914	0.495151	0.545852	-0.637387	0.910431	-0.736129	0.67582	0.873608	-0.417969	-0.755117	-0.0740351	-0.388708	-0.432367	0	-0.473262	-0.203698	-0.270395	0.625271	0.819438	0.44374	-0.283679	-0.847692	-0.521467	-0.235096	-0.454998	-0.390446
HMGR	-0.479029	0.423056	0.840115	0.722612	1	0.408578	-0.39274	0.845571	0.717327	0.79753	-0.930751	0.730679	0.73872	-0.139164	0.733306	-0.330673	-0.268841	0.824659	0.774451	0.892203	0.482039	0.835271	0.332929	0.710847	0.665054	-0.680349	0.721063	-0.645407	0.821264	0.746071	-0.459653	-0.702119	-0.284606	-0.337224	-0.203823	0	-0.390704	-0.343973	-0.0482118	0.540205	0.893316	0.814256	-0.223837	-0.745259	-0.285127	-0.568166	-0.451597	-0.573651
MDC	-0.773374	0.590759	0.709448	0.675505	0.408578	1	-0.564278	0.65547	0.872896	0.614211	-0.351304	0.405929	0.714381	-0.596118	0.515332	-0.549961	-0.281267	0.569947	0.670424	0.539472	0.400407	0.435519	0.144059	0.293015	0.266562	0.0632543	0.46658	-0.174775	0.741479	0.721087	-0.669994	-0.352983	-0.57	0.0949241	0.152138	0	0.0116132	0.50671	0.277676	0.146165	0.695525	0.355216	-0.672385	-0.785749	-0.0936448	0.343588	-0.228133	0.261354
MK	0.762756	-0.392439	-0.437082	-0.280902	-0.39274	-0.564278	1	-0.367575	-0.585738	-0.127587	0.572154	0.0164043	-0.229769	0.805487	-0.104204	0.744912	0.730309	-0.170075	-0.555673	-0.260455	-0.325684	-0.0255441	0.12804	-0.373224	-0.294947	-0.176871	-0.299475	0.07188	-0.63031	-0.513662	0.659239	-0.252005	0.639223	-0.641353	-0.303528	3.35095e-08	-0.528053	-0.395164	-0.552725	0.166443	-0.58904	-0.218856	0.16057	0.407691	-0.597441	-0.344047	-0.31529	-0.264175
AACT	-0.652134	0.4535	0.821649	0.917242	0.845571	0.65547	-0.367575	1	0.777047	0.916428	-0.718759	0.908245	0.966586	-0.347961	0.852697	-0.385091	-0.196325	0.957489	0.754078	0.968729	0.735775	0.851583	0.174642	0.574834	0.504033	-0.546484	0.912709	-0.574703	0.765302	0.955061	-0.564272	-0.736814	-0.357923	-0.378007	-0.18736	-2.31271e-08	-0.352395	-0.097837	0.0205193	0.421345	0.887827	0.670628	-0.361477	-0.859337	-0.454499	-0.27552	-0.558094	-0.350539
PMK	-0.77195	0.798903	0.894051	0.676591	0.717327	0.872896	-0.585738	0.777047	1	0.713064	-0.65754	0.505029	0.745978	-0.473896	0.591084	-0.550088	-0.360658	0.670768	0.859268	0.701005	0.333925	0.61145	0.218985	0.639481	0.559593	-0.150952	0.515334	-0.281008	0.947712	0.769507	-0.67101	-0.496476	-0.652001	0.018693	0.219337	4.13977e-08	-0.102129	0.265073	0.281647	0.252543	0.886247	0.657	-0.63301	-0.860728	-0.0754329	0.00939849	-0.424636	-0.00633534
IPPI	-0.40857	0.388545	0.862708	0.941671	0.79753	0.614211	-0.127587	0.916428	0.713064	1	-0.614284	0.907245	0.951192	-0.137775	0.896229	-0.194866	0.0787045	0.970095	0.761197	0.928898	0.582762	0.925808	0.433805	0.579904	0.558577	-0.669601	0.85495	-0.656896	0.726977	0.839284	-0.451308	-0.886053	-0.12712	-0.517638	-0.422361	4.32683e-08	-0.554305	-0.281945	-0.25721	0.63644	0.800925	0.585867	-0.382671	-0.884388	-0.609758	-0.450276	-0.668489	-0.538625
GPPS	0.58911	-0.332089	-0.739065	-0.570307	-0.930751	-0.351304	0.572154	-0.718759	-0.65754	-0.614284	1	-0.549898	-0.568643	0.309865	-0.542748	0.479037	0.471595	-0.674031	-0.715169	-0.784153	-0.50691	-0.660449	-0.0965782	-0.66106	-0.596631	0.500544	-0.610308	0.483353	-0.816183	-0.695753	0.542698	0.464179	0.401991	0.0656012	0.168767	0	0.0949326	0.290823	-0.129734	-0.321777	-0.802467	-0.80515	0.264557	0.704158	-0.0185293	0.48755	0.320334	0.450354
HDR	-0.378168	0.17518	0.650049	0.880745	0.730679	0.405929	0.0164043	0.908245	0.505029	0.907245	-0.549898	1	0.921186	-0.0348176	0.889578	-0.0643621	0.114446	0.963967	0.531862	0.937889	0.728519	0.907306	0.167961	0.403751	0.396297	-0.706539	0.891382	-0.640737	0.499711	0.810416	-0.285473	-0.870636	-0.0345345	-0.672576	-0.436325	4.77286e-08	-0.586558	-0.345772	-0.264919	0.532066	0.672345	0.602094	-0.262888	-0.728727	-0.727648	-0.45106	-0.676067	-0.506791
DXR	-0.580693	0.403805	0.785837	0.942047	0.73872	0.714381	-0.229769	0.966586	0.745978	0.951192	-0.568643	0.921186	1	-0.298245	0.862036	-0.325821	-0.0716511	0.964189	0.685279	0.935733	0.72216	0.849701	0.240203	0.449425	0.396007	-0.510533	0.887071	-0.54262	0.692544	0.924068	-0.542988	-0.800661	-0.286291	-0.469908	-0.262068	2.04874e-08	-0.422603	-0.0476006	-0.0554878	0.452637	0.803016	0.588722	-0.442127	-0.869495	-0.587023	-0.232226	-0.603271	-0.318731
DXS	0.748227	-0.351342	-0.247907	-0.255832	-0.139164	-0.596118	0.805487	-0.347961	-0.473896	-0.137775	0.309865	-0.0348176	-0.298245	1	0.0463316	0.885731	0.741047	-0.160569	-0.363586	-0.220278	-0.536557	0.123819	0.315809	-0.192957	0.0445777	-0.42149	-0.360487	-0.264381	-0.465204	-0.592778	0.848187	-0.290954	0.75056	-0.618563	-0.234558	0	-0.717564	-0.550738	-0.718188	0.477741	-0.339926	-0.0467162	0.323417	0.435998	-0.498382	-0.421447	-0.0800686	-0.342414
CMK	-0.368167	0.221278	0.795738	0.937571	0.733306	0.515332	-0.104204	0.852697	0.591084	0.896229	-0.542748	0.889578	0.862036	0.0463316	1	0.0953418	0.283547	0.920443	0.701491	0.85904	0.499031	0.952453	0.359272	0.491414	0.642286	-0.778078	0.80494	-0.854029	0.589145	0.719708	-0.128026	-0.840833	0.114088	-0.547878	-0.424221	3.29006e-08	-0.696718	-0.361519	-0.466455	0.774932	0.788865	0.505965	-0.20347	-0.736359	-0.634835	-0.323706	-0.475727	-0.440652
CMS	0.700209	-0.427898	-0.289825	-0.189876	-0.330673	-0.549961	0.744912	-0.385091	-0.550088	-0.194866	0.479037	-0.0643621	-0.325821	0.885731	0.0953418	1	0.910694	-0.203787	-0.337494	-0.312134	-0.503623	0.0545147	0.181401	-0.210566	0.103273	-0.363844	-0.309053	-0.310108	-0.554926	-0.581689	0.95362	-0.136038	0.873001	-0.437041	-0.284587	-1.71984e-08	-0.63313	-0.523706	-0.816095	0.453925	-0.390903	-0.321518	0.416184	0.46063	-0.403648	-0.173964	0.0229407	-0.18629
MECS	0.616726	-0.300331	-0.0691629	0.078591	-0.268841	-0.281267	0.730309	-0.196325	-0.360658	0.0787045	0.471595	0.114446	-0.0716511	0.741047	0.283547	0.910694	1	0.0124093	-0.123872	-0.147743	-0.370718	0.217822	0.34809	-0.0885805	0.198279	-0.420646	-0.0979577	-0.392288	-0.380576	-0.360596	0.760459	-0.314952	0.841281	-0.4741	-0.447642	2.985e-08	-0.69832	-0.507608	-0.889671	0.577565	-0.256297	-0.351188	0.246577	0.185389	-0.535696	-0.184816	-0.169601	-0.266242
HDS	-0.495989	0.283933	0.805331	0.949177	0.824659	0.569947	-0.170075	0.957489	0.670768	0.970095	-0.674031	0.963967	0.964189	-0.160569	0.920443	-0.203787	0.0124093	1	0.697988	0.980003	0.712563	0.940924	0.260746	0.507308	0.503848	-0.684235	0.905804	-0.676168	0.685176	0.883793	-0.43064	-0.866332	-0.140074	-0.540769	-0.422896	0	-0.523011	-0.286318	-0.212889	0.579001	0.804933	0.655038	-0.363227	-0.862923	-0.610018	-0.422314	-0.631161	-0.491098
STR	-0.554489	0.679908	0.966717	0.757937	0.774451	0.670424	-0.555673	0.754078	0.859268	0.761197	-0.715169	0.531862	0.685279	-0.363586	0.701491	-0.337494	-0.123872	0.697988	1	0.700286	0.268852	0.694927	0.408618	0.877092	0.860311	-0.451898	0.635052	-0.56562	0.931126	0.726809	-0.500301	-0.496401	-0.33089	0.0575647	-0.0797501	0	-0.218893	-0.143762	-0.0544343	0.509787	0.911546	0.478359	-0.299704	-0.828439	-0.0303888	-0.224996	-0.387593	-0.335947
G10H	-0.569918	0.322358	0.800324	0.891877	0.892203	0.539472	-0.260455	0.968729	0.701005	0.928898	-0.784153	0.937889	0.935733	-0.220278	0.85904	-0.312134	-0.147743	0.980003	0.700286	1	0.742173	0.912106	0.175499	0.544352	0.497583	-0.645127	0.890519	-0.614555	0.735616	0.904831	-0.503742	-0.817982	-0.261915	-0.482927	-0.339219	1.36163e-08	-0.427616	-0.264207	-0.0788757	0.48568	0.834257	0.760054	-0.380478	-0.861225	-0.512948	-0.452408	-0.62289	-0.482139
10-HGO	-0.609948	-0.0753891	0.318218	0.663959	0.482039	0.400407	-0.325684	0.735775	0.333925	0.582762	-0.50691	0.728519	0.72216	-0.536557	0.499031	-0.503623	-0.370718	0.712563	0.268852	0.742173	1	0.477187	-0.285111	0.0779933	-0.0438241	-0.256425	0.825568	-0.24925	0.3466	0.831633	-0.598008	-0.380651	-0.31463	-0.229941	-0.359129	7.51922e-09	0.051616	-0.0103173	0.206648	-0.0154921	0.441468	0.414724	-0.272961	-0.59856	-0.287765	-0.118423	-0.328224	-0.167987
8-HGO	-0.330124	0.256317	0.821044	0.874373	0.835271	0.435519	-0.0255441	0.851583	0.61145	0.925808	-0.660449	0.907306	0.849701	0.123819	0.952453	0.0545147	0.217822	0.940924	0.694927	0.912106	0.477187	1	0.370998	0.550713	0.647602	-0.812357	0.759426	-0.790399	0.649037	0.700984	-0.176786	-0.93233	0.0505685	-0.629261	-0.448168	0	-0.71984	-0.460319	-0.428403	0.76108	0.777305	0.687477	-0.303631	-0.779584	-0.656687	-0.536442	-0.633021	-0.574115
GES	0.383072	0.228992	0.448528	0.337914	0.332929	0.144059	0.12804	0.174642	0.218985	0.433805	-0.0965782	0.167961	0.240203	0.315809	0.359272	0.181401	0.34809	0.260746	0.408618	0.175499	-0.285111	0.370998	1	0.379137	0.438901	-0.538905	0.187602	-0.544949	0.261005	0.0333172	0.0289536	-0.44844	0.336117	-0.326694	-0.296182	5.10711e-08	-0.585284	-0.329784	-0.522927	0.7451	0.336416	-0.0507853	0.231136	-0.170383	-0.36051	-0.41963	-0.0479704	-0.579919
IS	-0.291441	0.697827	0.797146	0.495151	0.710847	0.293015	-0.373224	0.574834	0.639481	0.579904	-0.66106	0.403751	0.449425	-0.192957	0.491414	-0.210566	-0.0885805	0.507308	0.877092	0.544352	0.0779933	0.550713	0.379137	1	0.896384	-0.472518	0.492513	-0.437519	0.777135	0.516973	-0.337871	-0.378362	-0.2615	0.0705765	-0.00921187	2.16161e-08	-0.18553	-0.353001	-0.0556644	0.402093	0.733779	0.416983	-0.0583276	-0.590779	0.0619786	-0.445916	-0.460889	-0.512128
IO	-0.208309	0.503405	0.806373	0.545852	0.665054	0.266562	-0.294947	0.504033	0.559593	0.558577	-0.596631	0.396297	0.396007	0.0445777	0.642286	0.103273	0.198279	0.503848	0.860311	0.497583	-0.0438241	0.647602	0.438901	0.896384	1	-0.623369	0.423889	-0.681526	0.692538	0.386956	-0.0342112	-0.436815	0.0406727	-0.0133819	-0.14586	-3.54517e-08	-0.410155	-0.477726	-0.372485	0.659618	0.725579	0.358124	0.00761905	-0.534723	-0.0290084	-0.386916	-0.317818	-0.477901
7-DLH	-0.155213	0.0906965	-0.528399	-0.637387	-0.680349	0.0632543	-0.176871	-0.546484	-0.150952	-0.669601	0.500544	-0.706539	-0.510533	-0.42149	-0.778078	-0.363844	-0.420646	-0.684235	-0.451898	-0.645127	-0.256425	-0.812357	-0.538905	-0.472518	-0.623369	1	-0.628588	0.913647	-0.286519	-0.353379	-0.180693	0.747556	-0.490594	0.656987	0.648625	0	0.799754	0.811335	0.720541	-0.877254	-0.512433	-0.359844	-0.267389	0.359201	0.60921	0.740478	0.344094	0.839677
7-DLGT	-0.467887	0.181817	0.660946	0.910431	0.721063	0.46658	-0.299475	0.912709	0.515334	0.85495	-0.610308	0.891382	0.887071	-0.360487	0.80494	-0.309053	-0.0979577	0.905804	0.635052	0.890519	0.825568	0.759426	0.187602	0.492513	0.423889	-0.628588	1	-0.636706	0.56147	0.907162	-0.494338	-0.629039	-0.127177	-0.356455	-0.444565	1.37595e-08	-0.306504	-0.272986	-0.124303	0.43058	0.732149	0.405004	-0.0852852	-0.728176	-0.444663	-0.336448	-0.43748	-0.492122
CPR	0.0278108	0.0510472	-0.615901	-0.736129	-0.645407	-0.174775	0.07188	-0.574703	-0.281008	-0.656896	0.483353	-0.640737	-0.54262	-0.264381	-0.854029	-0.310108	-0.392288	-0.676168	-0.56562	-0.614555	-0.24925	-0.790399	-0.544949	-0.437519	-0.681526	0.913647	-0.636706	1	-0.371653	-0.409441	-0.148373	0.644608	-0.451773	0.470585	0.556358	1.25126e-07	0.731146	0.606806	0.696662	-0.918185	-0.63546	-0.265472	-0.237617	0.411951	0.487539	0.435957	0.110015	0.60338
LAMT	-0.710571	0.720271	0.938792	0.67582	0.821264	0.741479	-0.63031	0.765302	0.947712	0.726977	-0.816183	0.499711	0.692544	-0.465204	0.589145	-0.554926	-0.380576	0.685176	0.931126	0.735616	0.3466	0.649037	0.261005	0.777135	0.692538	-0.286519	0.56147	-0.371653	1	0.766913	-0.680913	-0.486669	-0.578015	0.0753541	0.046034	2.89263e-08	-0.0772434	0.0281324	0.200804	0.322459	0.904888	0.685007	-0.531514	-0.884964	0.0264276	-0.203013	-0.429232	-0.21929
SLS	-0.763872	0.430093	0.756884	0.873608	0.746071	0.721087	-0.513662	0.955061	0.769507	0.839284	-0.695753	0.810416	0.924068	-0.592778	0.719708	-0.581689	-0.360596	0.883793	0.726809	0.904831	0.831633	0.700984	0.0333172	0.516973	0.386956	-0.353379	0.907162	-0.409441	0.766913	1	-0.737073	-0.561589	-0.49564	-0.163062	-0.170199	0	-0.0887631	0.041852	0.200668	0.216926	0.822998	0.576438	-0.424323	-0.880347	-0.267367	-0.140117	-0.486325	-0.225566
OpGATA12	0.705951	-0.488743	-0.482823	-0.417969	-0.459653	-0.669994	0.659239	-0.564272	-0.67101	-0.451308	0.542698	-0.285473	-0.542988	0.848187	-0.128026	0.95362	0.760459	-0.43064	-0.500301	-0.503742	-0.598008	-0.176786	0.0289536	-0.337871	-0.0342112	-0.180693	-0.494338	-0.148373	-0.680913	-0.737073	1	0.113777	0.80909	-0.267676	-0.0996314	6.2346e-09	-0.439651	-0.394768	-0.651226	0.25432	-0.518107	-0.395188	0.514101	0.668828	-0.195264	-0.0300628	0.245296	-0.013151
OpGATA8	0.132036	-0.213261	-0.677118	-0.755117	-0.702119	-0.352983	-0.252005	-0.736814	-0.496476	-0.886053	0.464179	-0.870636	-0.800661	-0.290954	-0.840833	-0.136038	-0.314952	-0.866332	-0.496401	-0.817982	-0.380651	-0.93233	-0.44844	-0.378362	-0.436815	0.747556	-0.629039	0.644608	-0.486669	-0.561589	0.113777	1	-0.10807	0.814762	0.450884	0	0.811282	0.423303	0.454339	-0.7232	-0.589768	-0.645664	0.353987	0.673963	0.835426	0.594611	0.728348	0.591441
OpGATA9	0.770952	-0.671535	-0.300392	-0.0740351	-0.284606	-0.57	0.639223	-0.357923	-0.652001	-0.12712	0.401991	-0.0345345	-0.286291	0.75056	0.114088	0.873001	0.841281	-0.140074	-0.33089	-0.261915	-0.31463	0.0505685	0.336117	-0.2615	0.0406727	-0.490594	-0.127177	-0.451773	-0.578015	-0.49564	0.80909	-0.10807	1	-0.404303	-0.613543	-7.61872e-08	-0.569255	-0.65595	-0.903445	0.544723	-0.390407	-0.464717	0.594957	0.432806	-0.379	-0.287163	0.193026	-0.390762
OpGATA16	-0.271456	0.174687	-0.149642	-0.388708	-0.337224	0.0949241	-0.641353	-0.378007	0.018693	-0.517638	0.0656012	-0.672576	-0.469908	-0.618563	-0.547878	-0.437041	-0.4741	-0.540769	0.0575647	-0.482927	-0.229941	-0.629261	-0.326694	0.0705765	-0.0133819	0.656987	-0.356455	0.470585	0.0753541	-0.163062	-0.267676	0.814762	-0.404303	1	0.429191	1.9402e-08	0.854343	0.444523	0.537396	-0.566072	-0.132466	-0.378033	0.0265974	0.158172	0.960005	0.555038	0.515553	0.520927
OpGATA2	-0.284755	0.570391	-0.146901	-0.432367	-0.203823	0.152138	-0.303528	-0.18736	0.219337	-0.422361	0.168767	-0.436325	-0.262068	-0.234558	-0.424221	-0.284587	-0.447642	-0.422896	-0.0797501	-0.339219	-0.359129	-0.448168	-0.296182	-0.00921187	-0.14586	0.648625	-0.444565	0.556358	0.046034	-0.170199	-0.0996314	0.450884	-0.613543	0.429191	1	1.62898e-08	0.423141	0.734925	0.695	-0.561417	-0.0053605	0.0285504	-0.138155	0.252721	0.435366	0.585713	0.21829	0.682304
OpGATA3	9.28183e-09	1.63563e-07	0	0	0	0	3.35095e-08	-2.31271e-08	4.13977e-08	4.32683e-08	0	4.77286e-08	2.04874e-08	0	3.29006e-08	-1.71984e-08	2.985e-08	0	0	1.36163e-08	7.51922e-09	0	5.10711e-08	2.16161e-08	-3.54517e-08	0	1.37595e-08	1.25126e-07	2.89263e-08	0	6.2346e-09	0	-7.61872e-08	1.9402e-08	1.62898e-08	1	2.63615e-08	-2.78356e-08	1.25181e-07	3.26592e-08	6.35628e-08	2.44423e-08	1.51186e-08	-7.69854e-08	0	0	6.09907e-08	5.50295e-08
OpGATA4	-0.317076	0.0277997	-0.375534	-0.473262	-0.390704	0.0116132	-0.528053	-0.352395	-0.102129	-0.554305	0.0949326	-0.586558	-0.422603	-0.717564	-0.696718	-0.63313	-0.69832	-0.523011	-0.218893	-0.427616	0.051616	-0.71984	-0.585284	-0.18553	-0.410155	0.799754	-0.306504	0.731146	-0.0772434	-0.0887631	-0.439651	0.811282	-0.569255	0.854343	0.423141	2.63615e-08	1	0.558831	0.790335	-0.865601	-0.301637	-0.27573	-0.0820361	0.198997	0.848432	0.512666	0.396909	0.555779
OpGATA5	-0.468851	0.345337	-0.164552	-0.203698	-0.343973	0.50671	-0.395164	-0.097837	0.265073	-0.281945	0.290823	-0.345772	-0.0476006	-0.550738	-0.361519	-0.523706	-0.507608	-0.286318	-0.143762	-0.264207	-0.0103173	-0.460319	-0.329784	-0.353001	-0.477726	0.811335	-0.272986	0.606806	0.0281324	0.041852	-0.394768	0.423303	-0.65595	0.444523	0.734925	-2.78356e-08	0.558831	1	0.746849	-0.623702	-0.053836	-0.118999	-0.400537	0.0458368	0.328967	0.841053	0.296562	0.864797
OpGATA6	-0.571676	0.401305	-0.119349	-0.270395	-0.0482118	0.277676	-0.552725	0.0205193	0.281647	-0.25721	-0.129734	-0.264919	-0.0554878	-0.718188	-0.466455	-0.816095	-0.889671	-0.212889	-0.0544343	-0.0788757	0.206648	-0.428403	-0.522927	-0.0556644	-0.372485	0.720541	-0.124303	0.696662	0.200804	0.200668	-0.651226	0.454339	-0.903445	0.537396	0.695	1.25181e-07	0.790335	0.746849	1	-0.817807	0.0303689	0.181561	-0.356115	-0.0428675	0.547034	0.442201	0.100091	0.556056
OpGATA7	0.187228	0.00580204	0.59983	0.625271	0.540205	0.146165	0.166443	0.421345	0.252543	0.63644	-0.321777	0.532066	0.452637	0.477741	0.774932	0.453925	0.577565	0.579001	0.509787	0.48568	-0.0154921	0.76108	0.7451	0.402093	0.659618	-0.877254	0.43058	-0.918185	0.322459	0.216926	0.25432	-0.7232	0.544723	-0.566072	-0.561417	3.26592e-08	-0.865601	-0.623702	-0.817807	1	0.509056	0.221486	0.141495	-0.366589	-0.584649	-0.51191	-0.209279	-0.643466
OpGATA15	-0.660181	0.612545	0.932423	0.819438	0.893316	0.695525	-0.58904	0.887827	0.886247	0.800925	-0.802467	0.672345	0.803016	-0.339926	0.788865	-0.390903	-0.256297	0.804933	0.911546	0.834257	0.441468	0.777305	0.336416	0.733779	0.725579	-0.512433	0.732149	-0.63546	0.904888	0.822998	-0.518107	-0.589768	-0.390407	-0.132466	-0.0053605	6.35628e-08	-0.301637	-0.053836	0.0303689	0.509056	1	0.649967	-0.28532	-0.806609	-0.186481	-0.1966	-0.323717	-0.285231
OpGATA14	-0.561252	0.387179	0.614937	0.44374	0.814256	0.355216	-0.218856	0.670628	0.657	0.585867	-0.80515	0.602094	0.588722	-0.0467162	0.505965	-0.321518	-0.351188	0.655038	0.478359	0.760054	0.414724	0.687477	-0.0507853	0.416983	0.358124	-0.359844	0.405004	-0.265472	0.685007	0.576438	-0.395188	-0.645664	-0.464717	-0.378033	0.0285504	2.44423e-08	-0.27573	-0.118999	0.181561	0.221486	0.649967	1	-0.575908	-0.655619	-0.278187	-0.434574	-0.577878	-0.257586
OpGATA13	0.629739	-0.410466	-0.418572	-0.283679	-0.223837	-0.672385	0.16057	-0.361477	-0.63301	-0.382671	0.264557	-0.262888	-0.442127	0.323417	-0.20347	0.416184	0.246577	-0.363227	-0.299704	-0.380478	-0.272961	-0.303631	0.231136	-0.0583276	0.00761905	-0.267389	-0.0852852	-0.237617	-0.531514	-0.424323	0.514101	0.353987	0.594957	0.0265974	-0.138155	1.51186e-08	-0.0820361	-0.400537	-0.356115	0.141495	-0.28532	-0.575908	1	0.665303	0.101293	-0.133893	0.543243	-0.297327
OpGATA1	0.699017	-0.49952	-0.893233	-0.847692	-0.745259	-0.785749	0.407691	-0.859337	-0.860728	-0.884388	0.704158	-0.728727	-0.869495	0.435998	-0.736359	0.46063	0.185389	-0.862923	-0.828439	-0.861225	-0.59856	-0.779584	-0.170383	-0.590779	-0.534723	0.359201	-0.728176	0.411951	-0.884964	-0.880347	0.668828	0.673963	0.432806	0.158172	0.252721	-7.69854e-08	0.198997	0.0458368	-0.0428675	-0.366589	-0.806609	-0.655619	0.665303	1	0.261928	0.236018	0.625868	0.263889
OpGATA11	-0.187874	0.0992308	-0.226645	-0.521467	-0.285127	-0.0936448	-0.597441	-0.454499	-0.0754329	-0.609758	-0.0185293	-0.727648	-0.587023	-0.498382	-0.634835	-0.403648	-0.535696	-0.610018	-0.0303888	-0.512948	-0.287765	-0.656687	-0.36051	0.0619786	-0.0290084	0.60921	-0.444663	0.487539	0.0264276	-0.267367	-0.195264	0.835426	-0.379	0.960005	0.435366	0	0.848432	0.328967	0.547034	-0.584649	-0.186481	-0.278187	0.101293	0.261928	1	0.405387	0.539708	0.430848
OpGATA10	-0.332592	0.0693641	-0.303034	-0.235096	-0.568166	0.343588	-0.344047	-0.27552	0.00939849	-0.450276	0.48755	-0.45106	-0.232226	-0.421447	-0.323706	-0.173964	-0.184816	-0.422314	-0.224996	-0.452408	-0.118423	-0.536442	-0.41963	-0.445916	-0.386916	0.740478	-0.336448	0.435957	-0.203013	-0.140117	-0.0300628	0.594611	-0.287163	0.555038	0.585713	0	0.512666	0.841053	0.442201	-0.51191	-0.1966	-0.434574	-0.133893	0.236018	0.405387	1	0.531394	0.942629
OpGATA18	0.182725	-0.405074	-0.493204	-0.454998	-0.451597	-0.228133	-0.31529	-0.558094	-0.424636	-0.668489	0.320334	-0.676067	-0.603271	-0.0800686	-0.475727	0.0229407	-0.169601	-0.631161	-0.387593	-0.62289	-0.328224	-0.633021	-0.0479704	-0.460889	-0.317818	0.344094	-0.43748	0.110015	-0.429232	-0.486325	0.245296	0.728348	0.193026	0.515553	0.21829	6.09907e-08	0.396909	0.296562	0.100091	-0.209279	-0.323717	-0.577878	0.543243	0.625868	0.539708	0.531394	1	0.42821
OpGATA17	-0.354437	0.0726432	-0.377247	-0.390446	-0.573651	0.261354	-0.264175	-0.350539	-0.00633534	-0.538625	0.450354	-0.506791	-0.318731	-0.342414	-0.440652	-0.18629	-0.266242	-0.491098	-0.335947	-0.482139	-0.167987	-0.574115	-0.579919	-0.512128	-0.477901	0.839677	-0.492122	0.60338	-0.21929	-0.225566	-0.013151	0.591441	-0.390762	0.520927	0.682304	5.50295e-08	0.555779	0.864797	0.556056	-0.643466	-0.285231	-0.257586	-0.297327	0.263889	0.430848	0.942629	0.42821	1
