# Supplementary material for: Genome-wide Survey of the GATA Gene Family in Camptothecin-producing Plant Ophiorrhiza Pumila
Source: Research Square preprint supplement (doi:10.21203/rs.3.rs-385244/v1), 2021-04-06
Supplement: Supplementary file 2 [file d678e9a44462c57a6bea5136.xlsx]

## Sheet: Table S5
Table S5 Promoter analysis of the genes encoding enzymes in the CPT biosynthesis pathway with 3000bp
TSB		GT1-motif	GGTTAA	1555	6	+	Arabidopsis thaliana	light responsive element
TSB		GT1-motif	GGTTAAT	2449	7	-	Avena sativa	light responsive element
TSB		GT1-motif	GGTTAA	2450	6	-	Arabidopsis thaliana	light responsive element
TSB		G-box	CACGAC	770	6	+	Zea mays	cis-acting regulatory element involved in light responsiveness
TSB		G-box	CACGTG	2660	6	-	Arabidopsis thaliana	cis-acting regulatory element involved in light responsiveness
TSB		Box 4	ATTAAT	1060	6	+	Petroselinum crispum	part of a conserved DNA module involved in light responsiveness
TSB		Box 4	ATTAAT	2140	6	-	Petroselinum crispum	part of a conserved DNA module involved in light responsiveness
TSB		Box 4	ATTAAT	2160	6	-	Petroselinum crispum	part of a conserved DNA module involved in light responsiveness
TSB		Box 4	ATTAAT	2262	6	-	Petroselinum crispum	part of a conserved DNA module involved in light responsiveness
TSB		Box 4	ATTAAT	2544	6	-	Petroselinum crispum	part of a conserved DNA module involved in light responsiveness
TSB		Box 4	ATTAAT	2585	6	-	Petroselinum crispum	part of a conserved DNA module involved in light responsiveness
TSB		ERE	ATTTTAAA	2420	8	+	Nicotiana glutinos
TSB		ERE	ATTTTAAA	2422	8	-	Nicotiana glutinos
TSB		ERE	ATTTTAAA	2641	8	+	Nicotiana glutinos
TSB		as-1	TGACG	2516	5	+	Arabidopsis thaliana
TSB		ACE	CTAACGTATT	2631	9	-	Petroselinum crispum	cis-acting element involved in light responsiveness
TSB		box S	AGCCACC	2712	7	-	Arabidopsis thaliana
TSB		LTR	CCGAAA	1138	6	+	Hordeum vulgare	cis-acting element involved in low-temperature responsiveness
TSB		LTR	CCGAAA	2117	6	-	Hordeum vulgare	cis-acting element involved in low-temperature responsiveness
TSB		CAAT-box	CAAT	74	4	+	Nicotiana glutinosa
TSB		CAAT-box	CAAT	83	4	+	Nicotiana glutinosa
TSB		CAAT-box	CAAT	99	4	-	Nicotiana glutinosa
TSB		CAAT-box	CAAT	121	4	-	Nicotiana glutinosa
TSB		CAAT-box	CAAAT	324	5	-	Pisum sativum	common cis-acting element in promoter and enhancer regions
TSB		CAAT-box	CAAAT	495	5	-	Pisum sativum	common cis-acting element in promoter and enhancer regions
TSB		CAAT-box	CAAAT	522	5	-	Pisum sativum	common cis-acting element in promoter and enhancer regions
TSB		CAAT-box	CCAAT	562	5	-	Arabidopsis thaliana	common cis-acting element in promoter and enhancer regions
TSB		CAAT-box	CCAAT	873	5	+	Arabidopsis thaliana	common cis-acting element in promoter and enhancer regions
TSB		CAAT-box	CAAT	874	4	+	Nicotiana glutinosa
TSB		CAAT-box	CAAAT	878	5	+	Pisum sativum	common cis-acting element in promoter and enhancer regions
TSB		CAAT-box	CAAT	936	4	-	Nicotiana glutinosa
TSB		CAAT-box	CAAAT	991	5	+	Pisum sativum	common cis-acting element in promoter and enhancer regions
TSB		CAAT-box	CCAAT	1004	5	+	Arabidopsis thaliana	common cis-acting element in promoter and enhancer regions
TSB		CAAT-box	CAAT	1005	4	+	Nicotiana glutinosa
TSB		CAAT-box	CAAT	1032	4	-	Nicotiana glutinosa
TSB		CAAT-box	CCAAT	1067	5	+	Arabidopsis thaliana	common cis-acting element in promoter and enhancer regions
TSB		CAAT-box	CAAT	1068	4	+	Nicotiana glutinosa
TSB		CAAT-box	CAAT	1101	4	-	Nicotiana glutinosa
TSB		CAAT-box	CAAAT	1166	5	+	Pisum sativum	common cis-acting element in promoter and enhancer regions
TSB		CAAT-box	CAAT	1243	4	-	Nicotiana glutinosa
TSB		CAAT-box	CAAT	1482	4	+	Nicotiana glutinosa
TSB		CAAT-box	CAAT	1665	4	-	Nicotiana glutinosa
TSB		CAAT-box	CAAAT	1702	5	-	Pisum sativum	common cis-acting element in promoter and enhancer regions
TSB		CAAT-box	CAAAT	1711	5	+	Pisum sativum	common cis-acting element in promoter and enhancer regions
TSB		CAAT-box	CCAAT	1762	5	-	Arabidopsis thaliana	common cis-acting element in promoter and enhancer regions
TSB		CAAT-box	CAAT	1781	4	-	Nicotiana glutinosa
TSB		CAAT-box	CCAAT	1791	5	+	Arabidopsis thaliana	common cis-acting element in promoter and enhancer regions
TSB		CAAT-box	CAAT	1792	4	+	Nicotiana glutinosa
TSB		CAAT-box	CAAAT	1799	5	+	Pisum sativum	common cis-acting element in promoter and enhancer regions
TSB		CAAT-box	CCAAT	1823	5	-	Arabidopsis thaliana	common cis-acting element in promoter and enhancer regions
TSB		CAAT-box	CAAAT	1859	5	-	Pisum sativum	common cis-acting element in promoter and enhancer regions
TSB		CAAT-box	CAAT	1875	4	-	Nicotiana glutinosa
TSB		CAAT-box	CAAAT	1890	5	+	Pisum sativum	common cis-acting element in promoter and enhancer regions
TSB		CAAT-box	CCAAT	1896	5	+	Arabidopsis thaliana	common cis-acting element in promoter and enhancer regions
TSB		CAAT-box	CAAT	1897	4	+	Nicotiana glutinosa
TSB		CAAT-box	CAAT	1899	4	-	Nicotiana glutinosa
TSB		CAAT-box	CAAT	1983	4	-	Nicotiana glutinosa
TSB		CAAT-box	CAAT	1993	4	+	Nicotiana glutinosa
TSB		CAAT-box	CAAAT	2044	5	+	Pisum sativum	common cis-acting element in promoter and enhancer regions
TSB		CAAT-box	CAAT	2073	4	-	Nicotiana glutinosa
TSB		CAAT-box	CAAAT	2137	5	+	Pisum sativum	common cis-acting element in promoter and enhancer regions
TSB		CAAT-box	CAAT	2196	4	+	Nicotiana glutinosa
TSB		CAAT-box	CAAT	2348	4	-	Nicotiana glutinosa
TSB		CAAT-box	CAAT	2362	4	-	Nicotiana glutinosa
TSB		CAAT-box	CAAT	2368	4	-	Nicotiana glutinosa
TSB		CAAT-box	CAAT	2384	4	+	Nicotiana glutinosa
TSB		CAAT-box	CAAAT	2386	5	-	Pisum sativum	common cis-acting element in promoter and enhancer regions
TSB		CAAT-box	CAAT	2444	4	-	Nicotiana glutinosa
TSB		CAAT-box	CAAT	2513	4	+	Nicotiana glutinosa
TSB		CAAT-box	CAAT	2539	4	+	Nicotiana glutinosa
TSB		CAAT-box	CAAAT	2573	5	-	Pisum sativum	common cis-acting element in promoter and enhancer regions
TSB		CAAT-box	CAAAT	2672	5	-	Pisum sativum	common cis-acting element in promoter and enhancer regions
TSB		CAAT-box	CAAT	2707	4	-	Nicotiana glutinosa
TSB		CAAT-box	CAAAT	2720	5	+	Pisum sativum	common cis-acting element in promoter and enhancer regions
TSB		CAAT-box	CAAT	2818	4	-	Nicotiana glutinosa
TSB		CAAT-box	CAAT	2840	4	+	Nicotiana glutinosa
TSB		CAAT-box	CAAAT	2842	5	-	Pisum sativum	common cis-acting element in promoter and enhancer regions
TSB		CAAT-box	CCAAT	2872	5	-	Arabidopsis thaliana	common cis-acting element in promoter and enhancer regions
TSB		CAAT-box	CAAAT	2891	5	+	Pisum sativum	common cis-acting element in promoter and enhancer regions
TSB		CAAT-box	CAAT	2926	4	+	Nicotiana glutinosa
TSB		CAAT-box	CAAAT	2983	5	+	Pisum sativum	common cis-acting element in promoter and enhancer regions
TSB		CAAT-box	CCAAT	2986	5	-	Arabidopsis thaliana	common cis-acting element in promoter and enhancer regions
TSB		GATA-motif	GATAGGA	185	7	-	Arabidopsis thaliana	part of a light responsive element
TSB		AAGAA-motif	GAAAGAA	1140	7	+	Avena sativa
TSB		AAGAA-motif	GAAAGAA	1409	7	-	Avena sativa
TSB		MYB	CAACAG	1173	6	-	Arabidopsis thaliana
TSB		MYB	CAACAG	1545	6	+	Arabidopsis thaliana
TSB		MYB	CAACCA	1945	6	-	Arabidopsis thaliana
TSB		MYB	CAACCA	2729	6	+	Arabidopsis thaliana
TSB		STRE	AGGGG	147	5	+	Arabidopsis thaliana
TSB		STRE	AGGGG	371	5	-	Arabidopsis thaliana
TSB		Unnamed__1	CGTGG	769	5	-	Zea mays
TSB		Unnamed__1	CGTGG	1586	5	-	Zea mays
TSB		Unnamed__1	GAATTTAATTAA	2097	11	+	Glycine max	60K protein binding site
TSB		Myb-binding site	CAACAG	1173	6	-	Nicotiana tabacum
TSB		Myb-binding site	CAACAG	1545	6	+	Nicotiana tabacum
TSB			motif_sequence	85	4	+	organism	short_function
TSB			motif_sequence	182	4	+	organism	short_function
TSB			motif_sequence	202	4	-	organism	short_function
TSB			motif_sequence	214	4	+	organism	short_function
TSB			motif_sequence	244	4	-	organism	short_function
TSB			motif_sequence	314	4	+	organism	short_function
TSB			motif_sequence	463	4	-	organism	short_function
TSB			motif_sequence	550	4	-	organism	short_function
TSB			motif_sequence	556	4	-	organism	short_function
TSB			motif_sequence	784	4	-	organism	short_function
TSB			motif_sequence	999	4	+	organism	short_function
TSB			motif_sequence	1178	4	-	organism	short_function
TSB			motif_sequence	1269	4	+	organism	short_function
TSB			motif_sequence	1441	4	-	organism	short_function
TSB			motif_sequence	1474	4	-	organism	short_function
TSB			motif_sequence	1572	4	+	organism	short_function
TSB			motif_sequence	1578	4	-	organism	short_function
TSB			motif_sequence	1678	4	+	organism	short_function
TSB			motif_sequence	1695	4	+	organism	short_function
TSB			motif_sequence	1830	4	-	organism	short_function
TSB			motif_sequence	1834	4	+	organism	short_function
TSB			motif_sequence	1853	4	-	organism	short_function
TSB			motif_sequence	2253	4	+	organism	short_function
TSB			motif_sequence	2884	4	+	organism	short_function
TSB		MBS	CAACTG	996	6	+	Arabidopsis thaliana	MYB binding site involved in drought-inducibility
TSB		MBS	CAACTG	1548	6	-	Arabidopsis thaliana	MYB binding site involved in drought-inducibility
TSB		Myb	CAACTG	996	6	+	Arabidopsis thaliana
TSB		Myb	TAACTG	1170	6	+	Arabidopsis thaliana
TSB		Myb	CAACTG	1548	6	-	Arabidopsis thaliana
TSB		Unnamed__4	CTCC	87	4	+	Petroselinum hortense
TSB		Unnamed__4	CTCC	184	4	+	Petroselinum hortense
TSB		Unnamed__4	CTCC	199	4	-	Petroselinum hortense
TSB		Unnamed__4	CTCC	202	4	-	Petroselinum hortense
TSB		Unnamed__4	CTCC	244	4	-	Petroselinum hortense
TSB		Unnamed__4	CTCC	463	4	-	Petroselinum hortense
TSB		Unnamed__4	CTCC	544	4	-	Petroselinum hortense
TSB		Unnamed__4	CTCC	550	4	-	Petroselinum hortense
TSB		Unnamed__4	CTCC	556	4	-	Petroselinum hortense
TSB		Unnamed__4	CTCC	571	4	+	Petroselinum hortense
TSB		Unnamed__4	CTCC	712	4	+	Petroselinum hortense
TSB		Unnamed__4	CTCC	751	4	+	Petroselinum hortense
TSB		Unnamed__4	CTCC	781	4	-	Petroselinum hortense
TSB		Unnamed__4	CTCC	784	4	-	Petroselinum hortense
TSB		Unnamed__4	CTCC	1307	4	-	Petroselinum hortense
TSB		Unnamed__4	CTCC	1425	4	-	Petroselinum hortense
TSB		Unnamed__4	CTCC	1916	4	-	Petroselinum hortense
TSB		Unnamed__4	CTCC	1969	4	-	Petroselinum hortense
TSB		Unnamed__4	CTCC	2717	4	+	Petroselinum hortense
TSB		Unnamed__4	CTCC	2830	4	+	Petroselinum hortense
TSB		ABRE	CACGTG	2660	6	-	Arabidopsis thaliana	cis-acting element involved in the abscisic acid responsiveness
TSB		ABRE	ACGTG	2661	5	+	Arabidopsis thaliana	cis-acting element involved in the abscisic acid responsiveness
TSB		GTGGC-motif	GATTCTGTGGC	951	10	+	Spinacia oleracea	part of a light responsive element
TSB		DRE core	GCCGAC	218	6	+	Arabidopsis thaliana
TSB		TC-rich repeats	GTTTTCTTAC	857	9	-	Nicotiana tabacum	cis-acting element involved in defense and stress responsiveness
TSB		O2-site	GTTGACGTGA	2657	9	+	Zea mays	cis-acting regulatory element involved in zein metabolism regulation
TSB		AC-I	(T/C)C(T/C)(C/T)ACC(T/C)ACC	1837	8.5	+	Phaseolus vulgaris
TSB		I-box	TGATAATGT	280	9	-	Solanum tuberosum	part of a light responsive element
TSB		MYC	CATTTG	323	6	+	Arabidopsis thaliana
TSB		MYC	CAATTG	1897	6	-	Arabidopsis thaliana
TSB		ARE	AAACCA	564	6	-	Zea mays	cis-acting regulatory element essential for the anaerobic induction
TSB		ARE	AAACCA	2782	6	-	Zea mays	cis-acting regulatory element essential for the anaerobic induction
TSB		CGTCA-motif	CGTCA	2516	5	-	Hordeum vulgare	cis-acting regulatory element involved in the MeJA-responsiveness
TSB		MRE	AACCTAA	1959	7	+	Petroselinum crispum	MYB binding site involved in light responsiveness
TSB		TGA-element	AACGAC	2624	6	-	Brassica oleracea	auxin-responsive element
TSB		TGA-element	AACGAC	2963	6	-	Brassica oleracea	auxin-responsive element
TSB		AC-II	TCACCAACCCCC	2789	11	-	Populus tremuloides
TSB		ATCT-motif	AATCTAATCC	1807	10	-	Pisum sativum	part of a conserved DNA module involved in light responsiveness
TSB		AT~TATA-box	TATATA	37	6	+	Arabidopsis thaliana
TSB		AT~TATA-box	TATATA	2204	6	-	Arabidopsis thaliana
TSB		AT~TATA-box	TATATA	2206	6	-	Arabidopsis thaliana
TSB		AT~TATA-box	TATATA	2507	6	-	Arabidopsis thaliana
TSB		AT~TATA-box	TATATAAA	2557	8	-	Arabidopsis thaliana
TSB		AT~TATA-box	TATATA	2559	6	-	Arabidopsis thaliana
TSB		AT~TATA-box	TATATA	2561	6	-	Arabidopsis thaliana
TSB		AT~TATA-box	TATATA	2614	6	-	Arabidopsis thaliana
TSB		AT~TATA-box	TATATA	2616	6	-	Arabidopsis thaliana
TSB		AT~TATA-box	TATATAAA	2850	8	-	Arabidopsis thaliana
TSB		AT~TATA-box	TATATA	2852	6	-	Arabidopsis thaliana
TSB		AuxRR-core	GGTCCAT	2902	7	+	Nicotiana tabacum	cis-acting regulatory element involved in auxin responsiveness
TSB		TATA-box	ATATAT	36	6	+	Brassica napus	core promoter element around -30 of transcription start
TSB		TATA-box	TATATA	37	6	+	Arabidopsis thaliana	core promoter element around -30 of transcription start
TSB		TATA-box	ATATAA	38	6	+	Brassica oleracea	core promoter element around -30 of transcription start
TSB		TATA-box	TATA	39	4	+	Arabidopsis thaliana	core promoter element around -30 of transcription start
TSB		TATA-box	ATATAA	133	6	+	Brassica oleracea	core promoter element around -30 of transcription start
TSB		TATA-box	TATA	134	4	+	Arabidopsis thaliana	core promoter element around -30 of transcription start
TSB		TATA-box	TATAAAA	1008	7	-	Pisum sativum	core promoter element around -30 of transcription start
TSB		TATA-box	TATAAA	1009	6	-	Helianthus annuus	core promoter element around -30 of transcription start
TSB		TATA-box	TATAA	1010	5	-	Arabidopsis thaliana	core promoter element around -30 of transcription start
TSB		TATA-box	TATA	1011	4	+	Arabidopsis thaliana	core promoter element around -30 of transcription start
TSB		TATA-box	TATACA	1110	6	-	Helianthus annuus	core promoter element around -30 of transcription start
TSB		TATA-box	TATA	1112	4	+	Arabidopsis thaliana	core promoter element around -30 of transcription start
TSB		TATA-box	TATA	1352	4	+	Arabidopsis thaliana	core promoter element around -30 of transcription start
TSB		TATA-box	TATAA	1387	5	-	Arabidopsis thaliana	core promoter element around -30 of transcription start
TSB		TATA-box	TATA	1388	4	+	Arabidopsis thaliana	core promoter element around -30 of transcription start
TSB		TATA-box	TATA	1626	4	-	Arabidopsis thaliana	core promoter element around -30 of transcription start
TSB		TATA-box	TATA	1726	4	-	Arabidopsis thaliana	core promoter element around -30 of transcription start
TSB		TATA-box	TATA	2082	4	-	Arabidopsis thaliana	core promoter element around -30 of transcription start
TSB		TATA-box	TATAAAT	2164	7	-	Brassica juncea	core promoter element around -30 of transcription start
TSB		TATA-box	TATAAA	2165	6	-	Helianthus annuus	core promoter element around -30 of transcription start
TSB		TATA-box	TATAA	2166	5	-	Arabidopsis thaliana	core promoter element around -30 of transcription start
TSB		TATA-box	TATATTTATATTT	2167	12	+	Avena sativa	core promoter element around -30 of transcription start
TSB		TATA-box	TATAAATA	2169	8	-	Daucus carota	core promoter element around -30 of transcription start
TSB		TATA-box	TATAAAT	2170	7	-	Brassica juncea	core promoter element around -30 of transcription start
TSB		TATA-box	TATAAA	2171	6	-	Helianthus annuus	core promoter element around -30 of transcription start
TSB		TATA-box	TATAA	2172	5	-	Arabidopsis thaliana	core promoter element around -30 of transcription start
TSB		TATA-box	TATA	2173	4	-	Arabidopsis thaliana	core promoter element around -30 of transcription start
TSB		TATA-box	TACATAAA	2178	8	+	Oryza sativa	core promoter element around -30 of transcription start
TSB		TATA-box	TATATA	2204	6	-	Arabidopsis thaliana	core promoter element around -30 of transcription start
TSB		TATA-box	ATATAT	2205	6	-	Brassica napus	core promoter element around -30 of transcription start
TSB		TATA-box	TATATA	2206	6	-	Arabidopsis thaliana	core promoter element around -30 of transcription start
TSB		TATA-box	ATATAA	2207	6	+	Brassica oleracea	core promoter element around -30 of transcription start
TSB		TATA-box	TATA	2208	4	-	Arabidopsis thaliana	core promoter element around -30 of transcription start
TSB		TATA-box	ATTATA	2212	6	+	Brassica napus	core promoter element around -30 of transcription start
TSB		TATA-box	TATAA	2213	5	-	Arabidopsis thaliana	core promoter element around -30 of transcription start
TSB		TATA-box	TATA	2214	4	-	Arabidopsis thaliana	core promoter element around -30 of transcription start
TSB		TATA-box	ATTATA	2222	6	+	Brassica napus	core promoter element around -30 of transcription start
TSB		TATA-box	TATAA	2223	5	-	Arabidopsis thaliana	core promoter element around -30 of transcription start
TSB		TATA-box	TATA	2224	4	-	Arabidopsis thaliana	core promoter element around -30 of transcription start
TSB		TATA-box	ATATAT	2309	6	-	Brassica napus	core promoter element around -30 of transcription start
TSB		TATA-box	TATA	2310	4	-	Arabidopsis thaliana	core promoter element around -30 of transcription start
TSB		TATA-box	ATATAT	2506	6	-	Brassica napus	core promoter element around -30 of transcription start
TSB		TATA-box	TATATA	2507	6	-	Arabidopsis thaliana	core promoter element around -30 of transcription start
TSB		TATA-box	TATA	2509	4	-	Arabidopsis thaliana	core promoter element around -30 of transcription start
TSB		TATA-box	TATAAAA	2556	7	-	Pisum sativum	core promoter element around -30 of transcription start
TSB		TATA-box	TATAAA	2557	6	-	Helianthus annuus	core promoter element around -30 of transcription start
TSB		TATA-box	TATATAA	2558	7	-	Arabidopsis thaliana	core promoter element around -30 of transcription start
TSB		TATA-box	TATATA	2559	6	-	Arabidopsis thaliana	core promoter element around -30 of transcription start
TSB		TATA-box	ATATAT	2560	6	-	Brassica napus	core promoter element around -30 of transcription start
TSB		TATA-box	TATATA	2561	6	-	Arabidopsis thaliana	core promoter element around -30 of transcription start
TSB		TATA-box	ATATAA	2562	6	+	Brassica oleracea	core promoter element around -30 of transcription start
TSB		TATA-box	TATA	2563	4	-	Arabidopsis thaliana	core promoter element around -30 of transcription start
TSB		TATA-box	ATTATA	2612	6	+	Brassica napus	core promoter element around -30 of transcription start
TSB		TATA-box	TATATAA	2613	7	-	Arabidopsis thaliana	core promoter element around -30 of transcription start
TSB		TATA-box	TATATA	2614	6	-	Arabidopsis thaliana	core promoter element around -30 of transcription start
TSB		TATA-box	ATATAT	2615	6	-	Brassica napus	core promoter element around -30 of transcription start
TSB		TATA-box	TATATA	2616	6	-	Arabidopsis thaliana	core promoter element around -30 of transcription start
TSB		TATA-box	ATATAA	2617	6	+	Brassica oleracea	core promoter element around -30 of transcription start
TSB		TATA-box	TATA	2618	4	-	Arabidopsis thaliana	core promoter element around -30 of transcription start
TSB		TATA-box	TATAAAA	2628	7	-	Pisum sativum	core promoter element around -30 of transcription start
TSB		TATA-box	TATAAA	2629	6	-	Helianthus annuus	core promoter element around -30 of transcription start
TSB		TATA-box	TATAA	2630	5	-	Arabidopsis thaliana	core promoter element around -30 of transcription start
TSB		TATA-box	TATA	2631	4	-	Arabidopsis thaliana	core promoter element around -30 of transcription start
TSB		TATA-box	ATTATA	2702	6	+	Brassica napus	core promoter element around -30 of transcription start
TSB		TATA-box	TATAA	2703	5	-	Arabidopsis thaliana	core promoter element around -30 of transcription start
TSB		TATA-box	TATA	2704	4	-	Arabidopsis thaliana	core promoter element around -30 of transcription start
TSB		TATA-box	taTATAAAtc	2848	9	-	Arabidopsis thaliana	core promoter element around -30 of transcription start
TSB		TATA-box	TATAAAT	2849	7	-	Brassica juncea	core promoter element around -30 of transcription start
TSB		TATA-box	TATAAA	2850	6	-	Helianthus annuus	core promoter element around -30 of transcription start
TSB		TATA-box	TATATAA	2851	7	-	Arabidopsis thaliana	core promoter element around -30 of transcription start
TSB		TATA-box	TATATA	2852	6	-	Arabidopsis thaliana	core promoter element around -30 of transcription start
TSB		TATA-box	TATA	2854	4	-	Arabidopsis thaliana	core promoter element around -30 of transcription start
TSB		TATA-box	ATATAA	2939	6	+	Brassica oleracea	core promoter element around -30 of transcription start
TSB		TATA-box	TATA	2940	4	-	Arabidopsis thaliana	core promoter element around -30 of transcription start
TSB		TATA-box	ATATAA	2953	6	+	Brassica oleracea	core promoter element around -30 of transcription start
TSB		TATA-box	TATA	2954	4	-	Arabidopsis thaliana	core promoter element around -30 of transcription start
TSB		TGACG-motif	TGACG	2516	5	+	Hordeum vulgare	cis-acting regulatory element involved in the MeJA-responsiveness
TSB		TATA	TATAAAAT	1007	8	-	Arabidopsis thaliana
TSB		TATA	TATAAAAT	2555	8	-	Arabidopsis thaliana
TSB		TATA	TATAAAAT	2563	8	+	Arabidopsis thaliana
TSB		G-Box	CACGTG	2660	6	-	Pisum sativum	cis-acting regulatory element involved in light responsiveness
TSB		W box	TTGACC	638	6	+	Arabidopsis thaliana
STR		TCA-element	TCAGAAGAGG	2427	9	+	Brassica oleracea	cis-acting element involved in salicylic acid responsiveness
STR		CAAT-box	CAAAT	20	5	+	Pisum sativum	common cis-acting element in promoter and enhancer regions
STR		CAAT-box	CAAT	31	4	+	Nicotiana glutinosa
STR		CAAT-box	CAAT	69	4	+	Nicotiana glutinosa
STR		CAAT-box	CAAAT	76	5	+	Pisum sativum	common cis-acting element in promoter and enhancer regions
STR		CAAT-box	CAAT	118	4	+	Nicotiana glutinosa
STR		CAAT-box	CAAT	123	4	+	Nicotiana glutinosa
STR		CAAT-box	CAAT	130	4	+	Nicotiana glutinosa
STR		CAAT-box	CAAT	182	4	-	Nicotiana glutinosa
STR		CAAT-box	CAAAT	214	5	+	Pisum sativum	common cis-acting element in promoter and enhancer regions
STR		CAAT-box	CCAAT	239	5	-	Arabidopsis thaliana	common cis-acting element in promoter and enhancer regions
STR		CAAT-box	CAAAT	273	5	-	Pisum sativum	common cis-acting element in promoter and enhancer regions
STR		CAAT-box	CAAAT	339	5	-	Pisum sativum	common cis-acting element in promoter and enhancer regions
STR		CAAT-box	CAAT	346	4	+	Nicotiana glutinosa
STR		CAAT-box	CAAT	519	4	+	Nicotiana glutinosa
STR		CAAT-box	CAAAT	564	5	-	Pisum sativum	common cis-acting element in promoter and enhancer regions
STR		CAAT-box	CCAAT	573	5	+	Arabidopsis thaliana	common cis-acting element in promoter and enhancer regions
STR		CAAT-box	CAAT	574	4	+	Nicotiana glutinosa
STR		CAAT-box	CAAAT	644	5	-	Pisum sativum	common cis-acting element in promoter and enhancer regions
STR		CAAT-box	CAAAT	656	5	+	Pisum sativum	common cis-acting element in promoter and enhancer regions
STR		CAAT-box	CAAT	659	4	-	Nicotiana glutinosa
STR		CAAT-box	CAAAT	682	5	-	Pisum sativum	common cis-acting element in promoter and enhancer regions
STR		CAAT-box	CAAT	733	4	+	Nicotiana glutinosa
STR		CAAT-box	CAAT	775	4	+	Nicotiana glutinosa
STR		CAAT-box	CAAAT	912	5	+	Pisum sativum	common cis-acting element in promoter and enhancer regions
STR		CAAT-box	CAAT	973	4	-	Nicotiana glutinosa
STR		CAAT-box	CCCAATTT	1002	8	+	Arabidopsis thaliana	common cis-acting element in promoter and enhancer regions
STR		CAAT-box	CCAAT	1003	5	+	Arabidopsis thaliana	common cis-acting element in promoter and enhancer regions
STR		CAAT-box	CAAT	1004	4	+	Nicotiana glutinosa
STR		CAAT-box	CAAT	1016	4	-	Nicotiana glutinosa
STR		CAAT-box	CAAT	1021	4	+	Nicotiana glutinosa
STR		CAAT-box	CAAAT	1041	5	+	Pisum sativum	common cis-acting element in promoter and enhancer regions
STR		CAAT-box	CAAT	1088	4	-	Nicotiana glutinosa
STR		CAAT-box	CAAT	1110	4	+	Nicotiana glutinosa
STR		CAAT-box	CAAT	1159	4	-	Nicotiana glutinosa
STR		CAAT-box	CAAT	1194	4	+	Nicotiana glutinosa
STR		CAAT-box	CCAAT	1403	5	+	Arabidopsis thaliana	common cis-acting element in promoter and enhancer regions
STR		CAAT-box	CAAT	1404	4	+	Nicotiana glutinosa
STR		CAAT-box	CAAAT	1465	5	+	Pisum sativum	common cis-acting element in promoter and enhancer regions
STR		CAAT-box	CAAAT	1468	5	-	Pisum sativum	common cis-acting element in promoter and enhancer regions
STR		CAAT-box	CAAT	1513	4	-	Nicotiana glutinosa
STR		CAAT-box	CAAT	1532	4	+	Nicotiana glutinosa
STR		CAAT-box	CAAT	1561	4	+	Nicotiana glutinosa
STR		CAAT-box	CAAT	1639	4	-	Nicotiana glutinosa
STR		CAAT-box	CAAT	1643	4	+	Nicotiana glutinosa
STR		CAAT-box	CAAT	1658	4	+	Nicotiana glutinosa
STR		CAAT-box	CAAAT	1663	5	-	Pisum sativum	common cis-acting element in promoter and enhancer regions
STR		CAAT-box	CAAT	1709	4	+	Nicotiana glutinosa
STR		CAAT-box	CAAT	1812	4	+	Nicotiana glutinosa
STR		CAAT-box	CAAT	1814	4	-	Nicotiana glutinosa
STR		CAAT-box	CCAAT	1833	5	+	Arabidopsis thaliana	common cis-acting element in promoter and enhancer regions
STR		CAAT-box	CAAT	1834	4	+	Nicotiana glutinosa
STR		CAAT-box	CAAT	1995	4	+	Nicotiana glutinosa
STR		CAAT-box	CAAT	2043	4	-	Nicotiana glutinosa
STR		CAAT-box	CAAT	2062	4	-	Nicotiana glutinosa
STR		CAAT-box	CAAAT	2153	5	+	Pisum sativum	common cis-acting element in promoter and enhancer regions
STR		CAAT-box	CAAAT	2307	5	-	Pisum sativum	common cis-acting element in promoter and enhancer regions
STR		CAAT-box	CAAT	2313	4	-	Nicotiana glutinosa
STR		CAAT-box	CAAT	2401	4	-	Nicotiana glutinosa
STR		CAAT-box	CAAT	2439	4	-	Nicotiana glutinosa
STR		CAAT-box	CAAAT	2459	5	+	Pisum sativum	common cis-acting element in promoter and enhancer regions
STR		CAAT-box	CAAT	2540	4	+	Nicotiana glutinosa
STR		CAAT-box	CAAAT	2558	5	+	Pisum sativum	common cis-acting element in promoter and enhancer regions
STR		CAAT-box	CAAT	2573	4	+	Nicotiana glutinosa
STR		CAAT-box	CAAT	2587	4	+	Nicotiana glutinosa
STR		CAAT-box	CAAAT	2663	5	-	Pisum sativum	common cis-acting element in promoter and enhancer regions
STR		CAAT-box	CAAT	2699	4	+	Nicotiana glutinosa
STR		CAAT-box	CAAT	2701	4	-	Nicotiana glutinosa
STR		CAAT-box	CCAAT	2803	5	-	Arabidopsis thaliana	common cis-acting element in promoter and enhancer regions
STR		CAAT-box	CAAAT	2835	5	+	Pisum sativum	common cis-acting element in promoter and enhancer regions
STR		CAAT-box	CAAT	2896	4	+	Nicotiana glutinosa
STR		CAAT-box	CAAAT	2916	5	+	Pisum sativum	common cis-acting element in promoter and enhancer regions
STR		CAAT-box	CAAAT	2919	5	-	Pisum sativum	common cis-acting element in promoter and enhancer regions
STR		CAAT-box	CAAAT	2930	5	+	Pisum sativum	common cis-acting element in promoter and enhancer regions
STR		TCT-motif	TCTTAC	1348	6	-	Arabidopsis thaliana	part of a light responsive element
STR		TCT-motif	TCTTAC	1616	6	-	Arabidopsis thaliana	part of a light responsive element
STR		STRE	AGGGG	2630	5	+	Arabidopsis thaliana
STR		AAGAA-motif	gGTAAAGAAA	354	9	+	Avena sativa
STR		chs-CMA2a	TCACTTGA	2527	8	+	Petroselinum crispum	part of a light responsive element
STR		Unnamed__1	CGTGG	1800	5	-	Zea mays
STR		Box III	atCATTTTCACt	2520	11	+	Pisum sativum	protein binding site
STR			motif_sequence	228	4	-	organism	short_function
STR			motif_sequence	584	4	+	organism	short_function
STR			motif_sequence	843	4	-	organism	short_function
STR			motif_sequence	925	4	+	organism	short_function
STR			motif_sequence	1057	4	+	organism	short_function
STR			motif_sequence	1075	4	+	organism	short_function
STR			motif_sequence	1095	4	-	organism	short_function
STR			motif_sequence	1591	4	+	organism	short_function
STR			motif_sequence	1620	4	-	organism	short_function
STR			motif_sequence	2419	4	-	organism	short_function
STR			motif_sequence	2423	4	+	organism	short_function
STR			motif_sequence	2435	4	-	organism	short_function
STR			motif_sequence	2535	4	+	organism	short_function
STR			motif_sequence	2551	4	+	organism	short_function
STR		WUN-motif	AAATTACTA	81	9	+	Nicotiana glutinosa
STR		circadian	CAAAGATATC	480	9	-	Lycopersicon esculentum	cis-acting regulatory element involved in circadian control
STR		circadian	CAAAGATATC	826	9	+	Lycopersicon esculentum	cis-acting regulatory element involved in circadian control
STR		CAT-box	GCCACT	377	6	-	Arabidopsis thaliana	cis-acting regulatory element related to meristem expression
STR		G-box	CACGTC	976	6	-	Zea mays	cis-acting regulatory element involved in light responsiveness
STR		G-box	CACGTG	1801	6	-	Arabidopsis thaliana	cis-acting regulatory element involved in light responsiveness
STR		Box 4	ATTAAT	766	6	+	Petroselinum crispum	part of a conserved DNA module involved in light responsiveness
STR		Box 4	ATTAAT	1084	6	+	Petroselinum crispum	part of a conserved DNA module involved in light responsiveness
STR		Box 4	ATTAAT	1441	6	+	Petroselinum crispum	part of a conserved DNA module involved in light responsiveness
STR		Box 4	ATTAAT	2841	6	-	Petroselinum crispum	part of a conserved DNA module involved in light responsiveness
STR		as-1	TGACG	975	5	+	Arabidopsis thaliana
STR		ERE	ATTTTAAA	854	8	-	Nicotiana glutinos
STR		ERE	ATTTCATA	1119	8	+	Nicotiana glutinos
STR		ERE	ATTTTAAA	1507	8	-	Nicotiana glutinos
STR		ERE	ATTTCATA	1883	8	+	Nicotiana glutinos
STR		ERE	ATTTTAAA	1964	8	+	Nicotiana glutinos
STR		ERE	ATTTCATA	2261	8	-	Nicotiana glutinos
STR		ERE	ATTTTAAA	2655	8	+	Nicotiana glutinos
STR		ERE	ATTTTAAA	2657	8	-	Nicotiana glutinos
STR		ERE	ATTTTAAA	2688	8	-	Nicotiana glutinos
STR		L-box	ATCCCACCTAC	2385	10	+	Petroselinum crispum	part of a light responsive element
STR		TGA-element	AACGAC	1355	6	+	Brassica oleracea	auxin-responsive element
STR		CGTCA-motif	CGTCA	975	5	-	Hordeum vulgare	cis-acting regulatory element involved in the MeJA-responsiveness
STR		ARE	AAACCA	241	6	-	Zea mays	cis-acting regulatory element essential for the anaerobic induction
STR		ARE	AAACCA	994	6	-	Zea mays	cis-acting regulatory element essential for the anaerobic induction
STR		ARE	AAACCA	2085	6	+	Zea mays	cis-acting regulatory element essential for the anaerobic induction
STR		chs-CMA1a	TTACTTAA	2491	8	+	Daucus carota	part of a light responsive element
STR		CCGTCC motif	CCGTCC	1047	6	+	Nicotiana tabacum
STR		CCAAT-box	CAACGG	512	6	-	Hordeum vulgare	MYBHv1 binding site
STR		CCGTCC-box	CCGTCC	1047	6	+	Petroselinum hortense
STR		TATA-box	TATA	88	4	+	Arabidopsis thaliana	core promoter element around -30 of transcription start
STR		TATA-box	TATA	172	4	+	Arabidopsis thaliana	core promoter element around -30 of transcription start
STR		TATA-box	TATA	208	4	+	Arabidopsis thaliana	core promoter element around -30 of transcription start
STR		TATA-box	TATA	289	4	+	Arabidopsis thaliana	core promoter element around -30 of transcription start
STR		TATA-box	TACAAAA	394	7	+	Oryza sativa	core promoter element around -30 of transcription start
STR		TATA-box	TATA	404	4	+	Arabidopsis thaliana	core promoter element around -30 of transcription start
STR		TATA-box	TATAAAA	708	7	-	Pisum sativum	core promoter element around -30 of transcription start
STR		TATA-box	TATAAA	709	6	-	Helianthus annuus	core promoter element around -30 of transcription start
STR		TATA-box	TATAA	710	5	-	Arabidopsis thaliana	core promoter element around -30 of transcription start
STR		TATA-box	TATA	711	4	+	Arabidopsis thaliana	core promoter element around -30 of transcription start
STR		TATA-box	ATATAT	806	6	+	Brassica napus	core promoter element around -30 of transcription start
STR		TATA-box	TATA	807	4	+	Arabidopsis thaliana	core promoter element around -30 of transcription start
STR		TATA-box	TATA	1012	4	+	Arabidopsis thaliana	core promoter element around -30 of transcription start
STR		TATA-box	TATTTAAA	1145	8	-	Arabidopsis thaliana	core promoter element around -30 of transcription start
STR		TATA-box	ATATAA	1280	6	+	Brassica oleracea	core promoter element around -30 of transcription start
STR		TATA-box	TATA	1281	4	+	Arabidopsis thaliana	core promoter element around -30 of transcription start
STR		TATA-box	TATATAA	1668	7	-	Arabidopsis thaliana	core promoter element around -30 of transcription start
STR		TATA-box	TATATA	1669	6	-	Arabidopsis thaliana	core promoter element around -30 of transcription start
STR		TATA-box	ATATAT	1670	6	-	Brassica napus	core promoter element around -30 of transcription start
STR		TATA-box	TATA	1671	4	-	Arabidopsis thaliana	core promoter element around -30 of transcription start
STR		TATA-box	TATAA	1737	5	-	Arabidopsis thaliana	core promoter element around -30 of transcription start
STR		TATA-box	TATA	1738	4	-	Arabidopsis thaliana	core promoter element around -30 of transcription start
STR		TATA-box	ccTATAAAaa	1833	9	+	Arabidopsis thaliana	core promoter element around -30 of transcription start
STR		TATA-box	TATA	1859	4	-	Arabidopsis thaliana	core promoter element around -30 of transcription start
STR		TATA-box	TATATA	1951	6	-	Arabidopsis thaliana	core promoter element around -30 of transcription start
STR		TATA-box	ATATAA	1952	6	+	Brassica oleracea	core promoter element around -30 of transcription start
STR		TATA-box	TATA	1953	4	-	Arabidopsis thaliana	core promoter element around -30 of transcription start
STR		TATA-box	TATA	2013	4	-	Arabidopsis thaliana	core promoter element around -30 of transcription start
STR		TATA-box	TATA	2026	4	-	Arabidopsis thaliana	core promoter element around -30 of transcription start
STR		TATA-box	TACAAAA	2111	7	+	Oryza sativa	core promoter element around -30 of transcription start
STR		TATA-box	TATAA	2135	5	-	Arabidopsis thaliana	core promoter element around -30 of transcription start
STR		TATA-box	TATA	2136	4	-	Arabidopsis thaliana	core promoter element around -30 of transcription start
STR		TATA-box	ATATAA	2173	6	+	Brassica oleracea	core promoter element around -30 of transcription start
STR		TATA-box	TATA	2174	4	-	Arabidopsis thaliana	core promoter element around -30 of transcription start
STR		TATA-box	TATAAAT	2335	7	-	Brassica juncea	core promoter element around -30 of transcription start
STR		TATA-box	TATAAA	2336	6	-	Helianthus annuus	core promoter element around -30 of transcription start
STR		TATA-box	TATAA	2337	5	-	Arabidopsis thaliana	core promoter element around -30 of transcription start
STR		TATA-box	TATA	2338	4	-	Arabidopsis thaliana	core promoter element around -30 of transcription start
STR		TATA-box	TATAAAA	2543	7	-	Pisum sativum	core promoter element around -30 of transcription start
STR		TATA-box	TATAAA	2544	6	-	Helianthus annuus	core promoter element around -30 of transcription start
STR		TATA-box	TATATAA	2545	7	-	Arabidopsis thaliana	core promoter element around -30 of transcription start
STR		TATA-box	TATATA	2546	6	-	Arabidopsis thaliana	core promoter element around -30 of transcription start
STR		TATA-box	ATATAT	2547	6	-	Brassica napus	core promoter element around -30 of transcription start
STR		TATA-box	TATA	2548	4	-	Arabidopsis thaliana	core promoter element around -30 of transcription start
STR		TATA-box	TAAAGATT	2705	8	-	Arabidopsis thaliana	core promoter element around -30 of transcription start
STR		TATA-box	TACAAAA	2724	7	-	Oryza sativa	core promoter element around -30 of transcription start
STR		TATA-box	ATATAA	2746	6	+	Brassica oleracea	core promoter element around -30 of transcription start
STR		TATA-box	TATA	2747	4	-	Arabidopsis thaliana	core promoter element around -30 of transcription start
STR		TATA-box	TATA	2791	4	-	Arabidopsis thaliana	core promoter element around -30 of transcription start
STR		TATA-box	TATTTAAA	2934	8	-	Arabidopsis thaliana	core promoter element around -30 of transcription start
STR		TGACG-motif	TGACG	975	5	+	Hordeum vulgare	cis-acting regulatory element involved in the MeJA-responsiveness
STR		AT~TATA-box	TATATA	1669	6	-	Arabidopsis thaliana
STR		AT~TATA-box	TATATA	1951	6	-	Arabidopsis thaliana
STR		AT~TATA-box	TATATAAA	2544	8	-	Arabidopsis thaliana
STR		AT~TATA-box	TATATA	2546	6	-	Arabidopsis thaliana
STR		AuxRR-core	GGTCCAT	1674	7	-	Nicotiana tabacum	cis-acting regulatory element involved in auxin responsiveness
STR		Unnamed__16	GCTGCCCGTC	1264	9	+	Zea mays
STR		AT-rich sequence	TAAAATACT	2885	9	-	Pisum sativum	element for maximal elicitor-mediated activation (2copies)
STR		G-Box	CACGTG	1801	6	-	Pisum sativum	cis-acting regulatory element involved in light responsiveness
STR		TATA	TATAAAAT	2013	8	+	Arabidopsis thaliana
STR		TATA	TATAAAAT	2338	8	+	Arabidopsis thaliana
STR		TATA	TATAAAAT	2542	8	-	Arabidopsis thaliana
STR		MYB recognition site	CCGTTG	512	6	+	Arabidopsis thaliana
STR		Unnamed__4	CTCC	177	4	-	Petroselinum hortense
STR		Unnamed__4	CTCC	427	4	-	Petroselinum hortense
STR		Unnamed__4	CTCC	779	4	-	Petroselinum hortense
STR		Unnamed__4	CTCC	789	4	+	Petroselinum hortense
STR		Unnamed__4	CTCC	886	4	+	Petroselinum hortense
STR		Unnamed__4	CTCC	942	4	-	Petroselinum hortense
STR		Unnamed__4	CTCC	1338	4	+	Petroselinum hortense
STR		Unnamed__4	CTCC	1472	4	-	Petroselinum hortense
STR		Unnamed__4	CTCC	1850	4	-	Petroselinum hortense
STR		Unnamed__4	CTCC	2432	4	-	Petroselinum hortense
STR		Unnamed__4	CTCC	2435	4	-	Petroselinum hortense
STR		Unnamed__4	CTCC	2976	4	+	Petroselinum hortense
STR		ABRE	ACGTG	977	5	+	Arabidopsis thaliana	cis-acting element involved in the abscisic acid responsiveness
STR		ABRE	CACGTG	1801	6	-	Arabidopsis thaliana	cis-acting element involved in the abscisic acid responsiveness
STR		ABRE	ACGTG	1802	5	+	Arabidopsis thaliana	cis-acting element involved in the abscisic acid responsiveness
STR		DRE core	GCCGAC	415	6	+	Arabidopsis thaliana
STR		TC-rich repeats	GTTTTCTTAC	1348	9	-	Nicotiana tabacum	cis-acting element involved in defense and stress responsiveness
STR		O2-site	GTTGACGTGA	973	9	+	Zea mays	cis-acting regulatory element involved in zein metabolism regulation
STR		MYC	CATTTG	338	6	+	Arabidopsis thaliana
STR		MYC	CATGTG	494	6	-	Arabidopsis thaliana
STR		MYC	CATGTG	1605	6	-	Arabidopsis thaliana
STR		MYC	CATTTG	1662	6	+	Arabidopsis thaliana
STR		MYC	CAATTG	1812	6	-	Arabidopsis thaliana
STR		MYC	CAATTG	2699	6	-	Arabidopsis thaliana
STR		MYC	CATGTG	2979	6	-	Arabidopsis thaliana
STR		A-box	CCGTCC	1047	6	+	Petroselinum crispum	cis-acting regulatory element
SLS		ABRE	ACGTG	1155	5	+	Arabidopsis thaliana	cis-acting element involved in the abscisic acid responsiveness
SLS		ABRE	GCAACGTGTC	1653	9	+	Hordeum vulgare	cis-acting element involved in the abscisic acid responsiveness
SLS		ABRE	GCAACGTGTC	1993	9	+	Hordeum vulgare	cis-acting element involved in the abscisic acid responsiveness
SLS		ABRE	CACGTG	2765	6	-	Arabidopsis thaliana	cis-acting element involved in the abscisic acid responsiveness
SLS		ABRE	ACGTG	2766	5	+	Arabidopsis thaliana	cis-acting element involved in the abscisic acid responsiveness
SLS		Unnamed__4	CTCC	439	4	+	Petroselinum hortense
SLS		Unnamed__4	CTCC	1206	4	-	Petroselinum hortense
SLS		Unnamed__4	CTCC	1214	4	-	Petroselinum hortense
SLS		Unnamed__4	CTCC	1700	4	-	Petroselinum hortense
SLS		Unnamed__4	CTCC	1914	4	+	Petroselinum hortense
SLS		Unnamed__4	CTCC	2040	4	-	Petroselinum hortense
SLS		Unnamed__4	CTCC	2203	4	-	Petroselinum hortense
SLS		Unnamed__4	CTCC	2419	4	-	Petroselinum hortense
SLS		Unnamed__4	CTCC	2581	4	+	Petroselinum hortense
SLS		Unnamed__4	CTCC	2652	4	-	Petroselinum hortense
SLS		Unnamed__4	CTCC	2677	4	-	Petroselinum hortense
SLS		Myb	CAACTG	2538	6	+	Arabidopsis thaliana
SLS		GCN4_motif	TGAGTCA	1262	7	-	Oryza sativa	cis-regulatory element involved in endosperm expression
SLS		GCN4_motif	TGAGTCA	1271	7	-	Oryza sativa	cis-regulatory element involved in endosperm expression
SLS		GCN4_motif	TGAGTCA	1280	7	-	Oryza sativa	cis-regulatory element involved in endosperm expression
SLS		AP-1	TGAGTTAG	2982	8	+	Arabidopsis thaliana
SLS		MYC	CAATTG	452	6	+	Arabidopsis thaliana
SLS		MYC	CATTTG	642	6	-	Arabidopsis thaliana
SLS		MYC	CATTTG	694	6	+	Arabidopsis thaliana
SLS		MYC	CATTTG	800	6	+	Arabidopsis thaliana
SLS		MYC	CAATTG	1080	6	+	Arabidopsis thaliana
SLS		MYC	CATTTG	1348	6	+	Arabidopsis thaliana
SLS		MYC	CAATTG	2105	6	-	Arabidopsis thaliana
SLS		MYC	CAATTG	2485	6	-	Arabidopsis thaliana
SLS		MYC	CAATTG	2816	6	-	Arabidopsis thaliana
SLS		MYC	CATTTG	2956	6	+	Arabidopsis thaliana
SLS		I-box	GATAAGGGT	86	9	-	Arabidopsis thaliana	part of a light responsive element
SLS		TC-rich repeats	ATTCTCTAAC	371	9	-	Nicotiana tabacum	cis-acting element involved in defense and stress responsiveness
SLS		TC-rich repeats	ATTCTCTAAC	480	9	+	Nicotiana tabacum	cis-acting element involved in defense and stress responsiveness
SLS		TC-rich repeats	ATTCTCTAAC	904	9	-	Nicotiana tabacum	cis-acting element involved in defense and stress responsiveness
SLS		TC-rich repeats	ATTCTCTAAC	1013	9	+	Nicotiana tabacum	cis-acting element involved in defense and stress responsiveness
SLS		O2-site	GATGATGTGG	2086	9	+	Zea mays	cis-acting regulatory element involved in zein metabolism regulation
SLS		TGA-element	AACGAC	1103	6	+	Brassica oleracea	auxin-responsive element
SLS		chs-CMA1a	TTACTTAA	396	8	-	Daucus carota	part of a light responsive element
SLS		chs-CMA1a	TTACTTAA	929	8	-	Daucus carota	part of a light responsive element
SLS		CGTCA-motif	CGTCA	1149	5	+	Hordeum vulgare	cis-acting regulatory element involved in the MeJA-responsiveness
SLS		ARE	AAACCA	456	6	-	Zea mays	cis-acting regulatory element essential for the anaerobic induction
SLS		ARE	AAACCA	638	6	+	Zea mays	cis-acting regulatory element essential for the anaerobic induction
SLS		ARE	AAACCA	698	6	-	Zea mays	cis-acting regulatory element essential for the anaerobic induction
SLS		ARE	AAACCA	804	6	-	Zea mays	cis-acting regulatory element essential for the anaerobic induction
SLS		ARE	AAACCA	2882	6	+	Zea mays	cis-acting regulatory element essential for the anaerobic induction
SLS		G-Box	CACGTG	2765	6	-	Pisum sativum	cis-acting regulatory element involved in light responsiveness
SLS		W box	TTGACC	68	6	-	Arabidopsis thaliana
SLS		AT~TATA-box	TATATA	419	6	+	Arabidopsis thaliana
SLS		AT~TATA-box	TATATA	952	6	+	Arabidopsis thaliana
SLS		AT~TATA-box	TATATA	961	6	+	Arabidopsis thaliana
SLS		AT~TATA-box	TATATA	1665	6	-	Arabidopsis thaliana
SLS		AT~TATA-box	TATATA	1838	6	-	Arabidopsis thaliana
SLS		AT~TATA-box	TATATAAA	2213	8	-	Arabidopsis thaliana
SLS		AT~TATA-box	TATATA	2215	6	-	Arabidopsis thaliana
SLS		F-box	CTATTCTCATT	2549	10	+	Lycopersicon esculentum
SLS		TGACG-motif	TGACG	1149	5	-	Hordeum vulgare	cis-acting regulatory element involved in the MeJA-responsiveness
SLS		TATA-box	TATA	7	4	+	Arabidopsis thaliana	core promoter element around -30 of transcription start
SLS		TATA-box	TATAAATA	171	8	-	Daucus carota	core promoter element around -30 of transcription start
SLS		TATA-box	TATAAAT	172	7	-	Brassica juncea	core promoter element around -30 of transcription start
SLS		TATA-box	TATAAA	173	6	-	Helianthus annuus	core promoter element around -30 of transcription start
SLS		TATA-box	TATAA	174	5	-	Arabidopsis thaliana	core promoter element around -30 of transcription start
SLS		TATA-box	TATA	175	4	+	Arabidopsis thaliana	core promoter element around -30 of transcription start
SLS		TATA-box	TATAAATA	199	8	-	Daucus carota	core promoter element around -30 of transcription start
SLS		TATA-box	TATAAAT	200	7	-	Brassica juncea	core promoter element around -30 of transcription start
SLS		TATA-box	TATAAA	201	6	-	Helianthus annuus	core promoter element around -30 of transcription start
SLS		TATA-box	TATAA	202	5	-	Arabidopsis thaliana	core promoter element around -30 of transcription start
SLS		TATA-box	TATA	203	4	+	Arabidopsis thaliana	core promoter element around -30 of transcription start
SLS		TATA-box	ATTATA	229	6	+	Brassica napus	core promoter element around -30 of transcription start
SLS		TATA-box	TATAA	230	5	-	Arabidopsis thaliana	core promoter element around -30 of transcription start
SLS		TATA-box	TATA	231	4	+	Arabidopsis thaliana	core promoter element around -30 of transcription start
SLS		TATA-box	ATATAA	357	6	+	Brassica oleracea	core promoter element around -30 of transcription start
SLS		TATA-box	TATA	358	4	+	Arabidopsis thaliana	core promoter element around -30 of transcription start
SLS		TATA-box	ATATAT	418	6	+	Brassica napus	core promoter element around -30 of transcription start
SLS		TATA-box	TATATA	419	6	+	Arabidopsis thaliana	core promoter element around -30 of transcription start
SLS		TATA-box	ATATAA	420	6	+	Brassica oleracea	core promoter element around -30 of transcription start
SLS		TATA-box	TATA	421	4	+	Arabidopsis thaliana	core promoter element around -30 of transcription start
SLS		TATA-box	TATA	428	4	+	Arabidopsis thaliana	core promoter element around -30 of transcription start
SLS		TATA-box	ATATAT	476	6	+	Brassica napus	core promoter element around -30 of transcription start
SLS		TATA-box	TATA	477	4	+	Arabidopsis thaliana	core promoter element around -30 of transcription start
SLS		TATA-box	ATATAT	951	6	+	Brassica napus	core promoter element around -30 of transcription start
SLS		TATA-box	TATATA	952	6	+	Arabidopsis thaliana	core promoter element around -30 of transcription start
SLS		TATA-box	ATATAA	953	6	+	Brassica oleracea	core promoter element around -30 of transcription start
SLS		TATA-box	TATA	954	4	+	Arabidopsis thaliana	core promoter element around -30 of transcription start
SLS		TATA-box	TATATA	961	6	+	Arabidopsis thaliana	core promoter element around -30 of transcription start
SLS		TATA-box	TATA	963	4	+	Arabidopsis thaliana	core promoter element around -30 of transcription start
SLS		TATA-box	ATATAT	1009	6	+	Brassica napus	core promoter element around -30 of transcription start
SLS		TATA-box	TATA	1010	4	+	Arabidopsis thaliana	core promoter element around -30 of transcription start
SLS		TATA-box	TATA	1495	4	+	Arabidopsis thaliana	core promoter element around -30 of transcription start
SLS		TATA-box	TATAAAT	1645	7	-	Brassica juncea	core promoter element around -30 of transcription start
SLS		TATA-box	TATAAA	1646	6	-	Helianthus annuus	core promoter element around -30 of transcription start
SLS		TATA-box	TATAA	1647	5	-	Arabidopsis thaliana	core promoter element around -30 of transcription start
SLS		TATA-box	TATA	1648	4	-	Arabidopsis thaliana	core promoter element around -30 of transcription start
SLS		TATA-box	TATATA	1665	6	-	Arabidopsis thaliana	core promoter element around -30 of transcription start
SLS		TATA-box	ATATAA	1666	6	+	Brassica oleracea	core promoter element around -30 of transcription start
SLS		TATA-box	TATA	1667	4	-	Arabidopsis thaliana	core promoter element around -30 of transcription start
SLS		TATA-box	TATAAAT	1715	7	-	Brassica juncea	core promoter element around -30 of transcription start
SLS		TATA-box	TATAAA	1716	6	-	Helianthus annuus	core promoter element around -30 of transcription start
SLS		TATA-box	TATAA	1717	5	-	Arabidopsis thaliana	core promoter element around -30 of transcription start
SLS		TATA-box	TATA	1718	4	-	Arabidopsis thaliana	core promoter element around -30 of transcription start
SLS		TATA-box	TATA	1751	4	-	Arabidopsis thaliana	core promoter element around -30 of transcription start
SLS		TATA-box	TATA	1790	4	-	Arabidopsis thaliana	core promoter element around -30 of transcription start
SLS		TATA-box	TATAAAT	1818	7	-	Brassica juncea	core promoter element around -30 of transcription start
SLS		TATA-box	TATAAA	1819	6	-	Helianthus annuus	core promoter element around -30 of transcription start
SLS		TATA-box	TATAA	1820	5	-	Arabidopsis thaliana	core promoter element around -30 of transcription start
SLS		TATA-box	TATA	1821	4	-	Arabidopsis thaliana	core promoter element around -30 of transcription start
SLS		TATA-box	TATATA	1838	6	-	Arabidopsis thaliana	core promoter element around -30 of transcription start
SLS		TATA-box	ATATAA	1839	6	+	Brassica oleracea	core promoter element around -30 of transcription start
SLS		TATA-box	TATA	1840	4	-	Arabidopsis thaliana	core promoter element around -30 of transcription start
SLS		TATA-box	TATA	1923	4	-	Arabidopsis thaliana	core promoter element around -30 of transcription start
SLS		TATA-box	ATTATA	1942	6	+	Brassica napus	core promoter element around -30 of transcription start
SLS		TATA-box	TATAA	1943	5	-	Arabidopsis thaliana	core promoter element around -30 of transcription start
SLS		TATA-box	TATA	1944	4	-	Arabidopsis thaliana	core promoter element around -30 of transcription start
SLS		TATA-box	TATA	1958	4	-	Arabidopsis thaliana	core promoter element around -30 of transcription start
SLS		TATA-box	TATAAA	2005	6	-	Helianthus annuus	core promoter element around -30 of transcription start
SLS		TATA-box	TATAA	2006	5	-	Arabidopsis thaliana	core promoter element around -30 of transcription start
SLS		TATA-box	TATA	2007	4	-	Arabidopsis thaliana	core promoter element around -30 of transcription start
SLS		TATA-box	TATA	2167	4	-	Arabidopsis thaliana	core promoter element around -30 of transcription start
SLS		TATA-box	TATAAAT	2195	7	-	Brassica juncea	core promoter element around -30 of transcription start
SLS		TATA-box	TATAAA	2196	6	-	Helianthus annuus	core promoter element around -30 of transcription start
SLS		TATA-box	TATAA	2197	5	-	Arabidopsis thaliana	core promoter element around -30 of transcription start
SLS		TATA-box	TATA	2198	4	-	Arabidopsis thaliana	core promoter element around -30 of transcription start
SLS		TATA-box	TATAAAA	2212	7	-	Pisum sativum	core promoter element around -30 of transcription start
SLS		TATA-box	TATAAA	2213	6	-	Helianthus annuus	core promoter element around -30 of transcription start
SLS		TATA-box	TATATAA	2214	7	-	Arabidopsis thaliana	core promoter element around -30 of transcription start
SLS		TATA-box	TATATA	2215	6	-	Arabidopsis thaliana	core promoter element around -30 of transcription start
SLS		TATA-box	ATATAA	2216	6	+	Brassica oleracea	core promoter element around -30 of transcription start
SLS		TATA-box	TATA	2217	4	-	Arabidopsis thaliana	core promoter element around -30 of transcription start
SLS		TATA-box	ATTATA	2319	6	+	Brassica napus	core promoter element around -30 of transcription start
SLS		TATA-box	TATAA	2320	5	-	Arabidopsis thaliana	core promoter element around -30 of transcription start
SLS		TATA-box	TATA	2321	4	-	Arabidopsis thaliana	core promoter element around -30 of transcription start
SLS		TATA-box	TATAAAT	2363	7	-	Brassica juncea	core promoter element around -30 of transcription start
SLS		TATA-box	TATAAA	2364	6	-	Helianthus annuus	core promoter element around -30 of transcription start
SLS		TATA-box	TATAA	2365	5	-	Arabidopsis thaliana	core promoter element around -30 of transcription start
SLS		TATA-box	TATA	2366	4	-	Arabidopsis thaliana	core promoter element around -30 of transcription start
SLS		TATA-box	ATTATA	2467	6	+	Brassica napus	core promoter element around -30 of transcription start
SLS		TATA-box	TATAA	2468	5	-	Arabidopsis thaliana	core promoter element around -30 of transcription start
SLS		TATA-box	TATA	2469	4	-	Arabidopsis thaliana	core promoter element around -30 of transcription start
SLS		TATA-box	ATATAA	2900	6	+	Brassica oleracea	core promoter element around -30 of transcription start
SLS		TATA-box	TATA	2901	4	-	Arabidopsis thaliana	core promoter element around -30 of transcription start
SLS		MYB-like sequence	TAACCA	1076	6	+	Arabidopsis thaliana
SLS		MYB-like sequence	TAACCA	1720	6	+	Arabidopsis thaliana
SLS		MYB-like sequence	TAACCA	2391	6	+	Arabidopsis thaliana
SLS		Box 4	ATTAAT	122	6	+	Petroselinum crispum	part of a conserved DNA module involved in light responsiveness
SLS		Box 4	ATTAAT	156	6	+	Petroselinum crispum	part of a conserved DNA module involved in light responsiveness
SLS		Box 4	ATTAAT	160	6	+	Petroselinum crispum	part of a conserved DNA module involved in light responsiveness
SLS		Box 4	ATTAAT	184	6	+	Petroselinum crispum	part of a conserved DNA module involved in light responsiveness
SLS		Box 4	ATTAAT	191	6	+	Petroselinum crispum	part of a conserved DNA module involved in light responsiveness
SLS		Box 4	ATTAAT	219	6	+	Petroselinum crispum	part of a conserved DNA module involved in light responsiveness
SLS		Box 4	ATTAAT	225	6	+	Petroselinum crispum	part of a conserved DNA module involved in light responsiveness
SLS		Box 4	ATTAAT	246	6	+	Petroselinum crispum	part of a conserved DNA module involved in light responsiveness
SLS		Box 4	ATTAAT	265	6	+	Petroselinum crispum	part of a conserved DNA module involved in light responsiveness
SLS		Box 4	ATTAAT	272	6	+	Petroselinum crispum	part of a conserved DNA module involved in light responsiveness
SLS		Box 4	ATTAAT	279	6	+	Petroselinum crispum	part of a conserved DNA module involved in light responsiveness
SLS		Box 4	ATTAAT	288	6	+	Petroselinum crispum	part of a conserved DNA module involved in light responsiveness
SLS		Box 4	ATTAAT	297	6	+	Petroselinum crispum	part of a conserved DNA module involved in light responsiveness
SLS		Box 4	ATTAAT	308	6	+	Petroselinum crispum	part of a conserved DNA module involved in light responsiveness
SLS		Box 4	ATTAAT	343	6	+	Petroselinum crispum	part of a conserved DNA module involved in light responsiveness
SLS		Box 4	ATTAAT	347	6	+	Petroselinum crispum	part of a conserved DNA module involved in light responsiveness
SLS		Box 4	ATTAAT	1228	6	+	Petroselinum crispum	part of a conserved DNA module involved in light responsiveness
SLS		Box 4	ATTAAT	1469	6	+	Petroselinum crispum	part of a conserved DNA module involved in light responsiveness
SLS		Box 4	ATTAAT	2754	6	-	Petroselinum crispum	part of a conserved DNA module involved in light responsiveness
SLS		GT1-motif	GGTTAA	394	6	+	Arabidopsis thaliana	light responsive element
SLS		GT1-motif	GGTTAA	688	6	+	Arabidopsis thaliana	light responsive element
SLS		GT1-motif	GGTTAA	927	6	+	Arabidopsis thaliana	light responsive element
SLS		CAT-box	GCCACT	435	6	+	Arabidopsis thaliana	cis-acting regulatory element related to meristem expression
SLS		CAT-box	GCCACT	968	6	+	Arabidopsis thaliana	cis-acting regulatory element related to meristem expression
SLS		G-box	TACGTG	1154	6	+	Arabidopsis thaliana	cis-acting regulatory element involved in light responsiveness
SLS		G-box	CACGTG	2765	6	-	Arabidopsis thaliana	cis-acting regulatory element involved in light responsiveness
SLS		WUN-motif	CCATTTCAA	2616	9	-	Nicotiana glutinosa
SLS		LTR	CCGAAA	2406	6	+	Hordeum vulgare	cis-acting element involved in low-temperature responsiveness
SLS		as-1	TGACG	1149	5	-	Arabidopsis thaliana
SLS		ABRE4	CACGTA	1154	6	-	Zea mays
SLS		TATC-box	TATCCCA	383	7	+	Oryza sativa	cis-acting element involved in gibberellin-responsiveness
SLS		chs-CMA2a	TCACTTGA	2120	8	-	Petroselinum crispum	part of a light responsive element
SLS		MYB	TAACCA	1076	6	+	Arabidopsis thaliana
SLS		MYB	CAACCA	1547	6	+	Arabidopsis thaliana
SLS		MYB	TAACCA	1720	6	+	Arabidopsis thaliana
SLS		MYB	CAACCA	1892	6	+	Arabidopsis thaliana
SLS		MYB	CAACAG	2270	6	+	Arabidopsis thaliana
SLS		MYB	CAACCA	2381	6	-	Arabidopsis thaliana
SLS		MYB	TAACCA	2391	6	+	Arabidopsis thaliana
SLS		MYB	CAACCA	2440	6	+	Arabidopsis thaliana
SLS		MYB	CAACCA	2915	6	+	Arabidopsis thaliana
SLS		STRE	AGGGG	898	5	+	Arabidopsis thaliana
SLS		STRE	AGGGG	2889	5	-	Arabidopsis thaliana
SLS		TCT-motif	TCTTAC	400	6	-	Arabidopsis thaliana	part of a light responsive element
SLS		TCT-motif	TCTTAC	933	6	-	Arabidopsis thaliana	part of a light responsive element
SLS		TCT-motif	TCTTAC	2873	6	-	Arabidopsis thaliana	part of a light responsive element
SLS		CAAT-box	CAAT	20	4	-	Nicotiana glutinosa
SLS		CAAT-box	CAAT	26	4	-	Nicotiana glutinosa
SLS		CAAT-box	CAAAT	43	5	+	Pisum sativum	common cis-acting element in promoter and enhancer regions
SLS		CAAT-box	CAAT	51	4	+	Nicotiana glutinosa
SLS		CAAT-box	CAAT	368	4	-	Nicotiana glutinosa
SLS		CAAT-box	CAAT	452	4	+	Nicotiana glutinosa
SLS		CAAT-box	CCAAT	454	5	-	Arabidopsis thaliana	common cis-acting element in promoter and enhancer regions
SLS		CAAT-box	CAAAT	514	5	-	Pisum sativum	common cis-acting element in promoter and enhancer regions
SLS		CAAT-box	CAAAT	550	5	+	Pisum sativum	common cis-acting element in promoter and enhancer regions
SLS		CAAT-box	CAAT	553	4	-	Nicotiana glutinosa
SLS		CAAT-box	CAAT	602	4	+	Nicotiana glutinosa
SLS		CAAT-box	CAAAT	616	5	+	Pisum sativum	common cis-acting element in promoter and enhancer regions
SLS		CAAT-box	CAAT	626	4	+	Nicotiana glutinosa
SLS		CAAT-box	CAAAT	642	5	+	Pisum sativum	common cis-acting element in promoter and enhancer regions
SLS		CAAT-box	CAAAT	652	5	+	Pisum sativum	common cis-acting element in promoter and enhancer regions
SLS		CAAT-box	CAAT	664	4	+	Nicotiana glutinosa
SLS		CAAT-box	CAAAT	666	5	-	Pisum sativum	common cis-acting element in promoter and enhancer regions
SLS		CAAT-box	CAAT	681	4	-	Nicotiana glutinosa
SLS		CAAT-box	CAAAT	695	5	-	Pisum sativum	common cis-acting element in promoter and enhancer regions
SLS		CAAT-box	CAAT	736	4	-	Nicotiana glutinosa
SLS		CAAT-box	CAAT	787	4	-	Nicotiana glutinosa
SLS		CAAT-box	CAAAT	801	5	-	Pisum sativum	common cis-acting element in promoter and enhancer regions
SLS		CAAT-box	CAAT	818	4	-	Nicotiana glutinosa
SLS		CAAT-box	CAAAT	827	5	-	Pisum sativum	common cis-acting element in promoter and enhancer regions
SLS		CAAT-box	CAAT	842	4	-	Nicotiana glutinosa
SLS		CAAT-box	CAAAT	987	5	-	Pisum sativum	common cis-acting element in promoter and enhancer regions
SLS		CAAT-box	CAAT	1022	4	+	Nicotiana glutinosa
SLS		CAAT-box	CAAT	1041	4	-	Nicotiana glutinosa
SLS		CAAT-box	CCAAT	1079	5	+	Arabidopsis thaliana	common cis-acting element in promoter and enhancer regions
SLS		CAAT-box	CAAT	1080	4	+	Nicotiana glutinosa
SLS		CAAT-box	CAAT	1082	4	-	Nicotiana glutinosa
SLS		CAAT-box	CAAAT	1186	5	+	Pisum sativum	common cis-acting element in promoter and enhancer regions
SLS		CAAT-box	CAAT	1202	4	+	Nicotiana glutinosa
SLS		CAAT-box	CAAT	1244	4	+	Nicotiana glutinosa
SLS		CAAT-box	CAAAT	1252	5	+	Pisum sativum	common cis-acting element in promoter and enhancer regions
SLS		CAAT-box	CAAT	1255	4	-	Nicotiana glutinosa
SLS		CAAT-box	CAAAT	1259	5	-	Pisum sativum	common cis-acting element in promoter and enhancer regions
SLS		CAAT-box	CAAAT	1349	5	-	Pisum sativum	common cis-acting element in promoter and enhancer regions
SLS		CAAT-box	CCAAT	1373	5	+	Arabidopsis thaliana	common cis-acting element in promoter and enhancer regions
SLS		CAAT-box	CAAT	1374	4	+	Nicotiana glutinosa
SLS		CAAT-box	CAAAT	1511	5	+	Pisum sativum	common cis-acting element in promoter and enhancer regions
SLS		CAAT-box	CAAT	1596	4	+	Nicotiana glutinosa
SLS		CAAT-box	CAAT	1607	4	-	Nicotiana glutinosa
SLS		CAAT-box	CAAAT	1642	5	+	Pisum sativum	common cis-acting element in promoter and enhancer regions
SLS		CAAT-box	CAAAT	1683	5	+	Pisum sativum	common cis-acting element in promoter and enhancer regions
SLS		CAAT-box	CAAT	1769	4	+	Nicotiana glutinosa
SLS		CAAT-box	CAAT	1780	4	-	Nicotiana glutinosa
SLS		CAAT-box	CAAAT	1815	5	+	Pisum sativum	common cis-acting element in promoter and enhancer regions
SLS		CAAT-box	CAAAT	1856	5	+	Pisum sativum	common cis-acting element in promoter and enhancer regions
SLS		CAAT-box	CCAAT	1916	5	+	Arabidopsis thaliana	common cis-acting element in promoter and enhancer regions
SLS		CAAT-box	CAAT	1917	4	+	Nicotiana glutinosa
SLS		CAAT-box	CAAT	1937	4	+	Nicotiana glutinosa
SLS		CAAT-box	CAAT	1948	4	-	Nicotiana glutinosa
SLS		CAAT-box	CAAAT	1982	5	+	Pisum sativum	common cis-acting element in promoter and enhancer regions
SLS		CAAT-box	CAAAT	2023	5	+	Pisum sativum	common cis-acting element in promoter and enhancer regions
SLS		CAAT-box	CAAT	2105	4	+	Nicotiana glutinosa
SLS		CAAT-box	CAAT	2107	4	-	Nicotiana glutinosa
SLS		CAAT-box	CAAT	2129	4	-	Nicotiana glutinosa
SLS		CAAT-box	CAAT	2146	4	+	Nicotiana glutinosa
SLS		CAAT-box	CAAAT	2192	5	+	Pisum sativum	common cis-acting element in promoter and enhancer regions
SLS		CAAT-box	CAAT	2314	4	+	Nicotiana glutinosa
SLS		CAAT-box	CAAT	2325	4	-	Nicotiana glutinosa
SLS		CAAT-box	CAAAT	2333	5	+	Pisum sativum	common cis-acting element in promoter and enhancer regions
SLS		CAAT-box	CAAAT	2360	5	+	Pisum sativum	common cis-acting element in promoter and enhancer regions
SLS		CAAT-box	CAAT	2485	4	+	Nicotiana glutinosa
SLS		CAAT-box	CAAT	2487	4	-	Nicotiana glutinosa
SLS		CAAT-box	CAAAT	2557	5	-	Pisum sativum	common cis-acting element in promoter and enhancer regions
SLS		CAAT-box	CAAT	2699	4	-	Nicotiana glutinosa
SLS		CAAT-box	CAAT	2816	4	+	Nicotiana glutinosa
SLS		CAAT-box	CAAT	2818	4	-	Nicotiana glutinosa
SLS		CAAT-box	CAAT	2822	4	-	Nicotiana glutinosa
SLS		CAAT-box	TGCAAATCT	2826	9	-	Brassica juncea	common cis-acting element in promoter and enhancer regions
SLS		CAAT-box	CAAAT	2828	5	-	Pisum sativum	common cis-acting element in promoter and enhancer regions
SLS		CAAT-box	CCAAT	2863	5	-	Arabidopsis thaliana	common cis-acting element in promoter and enhancer regions
SLS		CAAT-box	CAAT	2906	4	-	Nicotiana glutinosa
SLS		CAAT-box	CAAAT	2957	5	-	Pisum sativum	common cis-acting element in promoter and enhancer regions
SLS		GATA-motif	GATAGGA	2602	7	+	Arabidopsis thaliana	part of a light responsive element
SLS		AE-box	AGAAACAA	1831	8	-	Arabidopsis thaliana	part of a module for light response
SLS		ABRE3a	TACGTG	1154	6	+	Zea mays
SLS		MBS	CAACTG	2538	6	+	Arabidopsis thaliana	MYB binding site involved in drought-inducibility
SLS			motif_sequence	472	4	-	organism	short_function
SLS			motif_sequence	768	4	+	organism	short_function
SLS			motif_sequence	874	4	+	organism	short_function
SLS			motif_sequence	1005	4	-	organism	short_function
SLS			motif_sequence	1094	4	-	organism	short_function
SLS			motif_sequence	1301	4	-	organism	short_function
SLS			motif_sequence	1310	4	-	organism	short_function
SLS			motif_sequence	1401	4	+	organism	short_function
SLS			motif_sequence	1431	4	-	organism	short_function
SLS			motif_sequence	1525	4	-	organism	short_function
SLS			motif_sequence	2040	4	-	organism	short_function
SLS			motif_sequence	2723	4	+	organism	short_function
SLS			motif_sequence	2857	4	+	organism	short_function
SLS		Unnamed__1	GAATTTAATTAA	1462	11	+	Glycine max	60K protein binding site
SLS		Myb-binding site	CAACAG	2270	6	+	Nicotiana tabacum
PMK		chs-CMA2a	TCACTTGA	2379	8	+	Petroselinum crispum	part of a light responsive element
PMK		AAGAA-motif	gGTAAAGAAA	11	9	-	Avena sativa
PMK		AAGAA-motif	GAAAGAA	12	7	-	Avena sativa
PMK		AAGAA-motif	gGTAAAGAAA	67	9	-	Avena sativa
PMK		AAGAA-motif	GAAAGAA	367	7	+	Avena sativa
PMK		STRE	AGGGG	2324	5	+	Arabidopsis thaliana
PMK		STRE	AGGGG	2430	5	-	Arabidopsis thaliana
PMK		MYB	TAACCA	571	6	-	Arabidopsis thaliana
PMK		MYB	TAACCA	1456	6	+	Arabidopsis thaliana
PMK		CAAT-box	CCCAATTT	18	8	+	Arabidopsis thaliana	common cis-acting element in promoter and enhancer regions
PMK		CAAT-box	CCAAT	19	5	+	Arabidopsis thaliana	common cis-acting element in promoter and enhancer regions
PMK		CAAT-box	CAAT	20	4	+	Nicotiana glutinosa
PMK		CAAT-box	CAAT	119	4	+	Nicotiana glutinosa
PMK		CAAT-box	CAAT	143	4	+	Nicotiana glutinosa
PMK		CAAT-box	CAAT	161	4	+	Nicotiana glutinosa
PMK		CAAT-box	CAAAT	205	5	-	Pisum sativum	common cis-acting element in promoter and enhancer regions
PMK		CAAT-box	CAAT	212	4	+	Nicotiana glutinosa
PMK		CAAT-box	CAAT	255	4	-	Nicotiana glutinosa
PMK		CAAT-box	CCAAT	272	5	+	Arabidopsis thaliana	common cis-acting element in promoter and enhancer regions
PMK		CAAT-box	CAAT	273	4	+	Nicotiana glutinosa
PMK		CAAT-box	CAAT	297	4	+	Nicotiana glutinosa
PMK		CAAT-box	CAAT	299	4	-	Nicotiana glutinosa
PMK		CAAT-box	CAAT	330	4	+	Nicotiana glutinosa
PMK		CAAT-box	CAAAT	332	5	-	Pisum sativum	common cis-acting element in promoter and enhancer regions
PMK		CAAT-box	CAAT	348	4	+	Nicotiana glutinosa
PMK		CAAT-box	CAAT	373	4	-	Nicotiana glutinosa
PMK		CAAT-box	CAAT	404	4	-	Nicotiana glutinosa
PMK		CAAT-box	CAAAT	409	5	-	Pisum sativum	common cis-acting element in promoter and enhancer regions
PMK		CAAT-box	CAAT	428	4	-	Nicotiana glutinosa
PMK		CAAT-box	CCAAT	435	5	-	Arabidopsis thaliana	common cis-acting element in promoter and enhancer regions
PMK		CAAT-box	CAAT	447	4	-	Nicotiana glutinosa
PMK		CAAT-box	CAAAT	499	5	+	Pisum sativum	common cis-acting element in promoter and enhancer regions
PMK		CAAT-box	CCAAT	715	5	+	Arabidopsis thaliana	common cis-acting element in promoter and enhancer regions
PMK		CAAT-box	CAAT	716	4	+	Nicotiana glutinosa
PMK		CAAT-box	CAAT	1050	4	-	Nicotiana glutinosa
PMK		CAAT-box	CAAT	1182	4	-	Nicotiana glutinosa
PMK		CAAT-box	CCAAT	1303	5	-	Arabidopsis thaliana	common cis-acting element in promoter and enhancer regions
PMK		CAAT-box	CAAAT	1512	5	+	Pisum sativum	common cis-acting element in promoter and enhancer regions
PMK		CAAT-box	CAAAT	1532	5	-	Pisum sativum	common cis-acting element in promoter and enhancer regions
PMK		CAAT-box	CAAAT	1547	5	+	Pisum sativum	common cis-acting element in promoter and enhancer regions
PMK		CAAT-box	CAAT	1571	4	-	Nicotiana glutinosa
PMK		CAAT-box	CAAT	1619	4	+	Nicotiana glutinosa
PMK		CAAT-box	CAAT	1621	4	-	Nicotiana glutinosa
PMK		CAAT-box	CAAT	1639	4	-	Nicotiana glutinosa
PMK		CAAT-box	CAAT	1653	4	-	Nicotiana glutinosa
PMK		CAAT-box	CCAAT	1663	5	+	Arabidopsis thaliana	common cis-acting element in promoter and enhancer regions
PMK		CAAT-box	CAAT	1664	4	+	Nicotiana glutinosa
PMK		CAAT-box	CAAT	1878	4	-	Nicotiana glutinosa
PMK		CAAT-box	CAAT	1903	4	+	Nicotiana glutinosa
PMK		CAAT-box	CAAAT	1964	5	+	Pisum sativum	common cis-acting element in promoter and enhancer regions
PMK		CAAT-box	CAAT	1986	4	+	Nicotiana glutinosa
PMK		CAAT-box	CAAAT	2020	5	+	Pisum sativum	common cis-acting element in promoter and enhancer regions
PMK		CAAT-box	CAAAT	2037	5	+	Pisum sativum	common cis-acting element in promoter and enhancer regions
PMK		CAAT-box	CAAT	2237	4	-	Nicotiana glutinosa
PMK		CAAT-box	CAAAT	2291	5	+	Pisum sativum	common cis-acting element in promoter and enhancer regions
PMK		CAAT-box	CCAAT	2307	5	-	Arabidopsis thaliana	common cis-acting element in promoter and enhancer regions
PMK		CAAT-box	CAAAT	2390	5	+	Pisum sativum	common cis-acting element in promoter and enhancer regions
PMK		CAAT-box	CAAT	2516	4	+	Nicotiana glutinosa
PMK		CAAT-box	CAAT	2518	4	-	Nicotiana glutinosa
PMK		CAAT-box	CAAAT	2557	5	+	Pisum sativum	common cis-acting element in promoter and enhancer regions
PMK		CAAT-box	CCAAT	2611	5	+	Arabidopsis thaliana	common cis-acting element in promoter and enhancer regions
PMK		CAAT-box	CAAT	2612	4	+	Nicotiana glutinosa
PMK		CAAT-box	CAAT	2635	4	+	Nicotiana glutinosa
PMK		CAAT-box	CAAT	2673	4	-	Nicotiana glutinosa
PMK		CAAT-box	CAAT	2786	4	-	Nicotiana glutinosa
PMK		CAAT-box	CAAT	2912	4	-	Nicotiana glutinosa
PMK		CAAT-box	CCAAT	2966	5	-	Arabidopsis thaliana	common cis-acting element in promoter and enhancer regions
PMK		CAAT-box	CAAT	2982	4	-	Nicotiana glutinosa
PMK		TCA-element	CCATCTTTTT	2658	9	+	Nicotiana tabacum	cis-acting element involved in salicylic acid responsiveness
PMK		AE-box	AGAAACTT	615	8	+	Arabidopsis thaliana	part of a module for light response
PMK		AE-box	AGAAACAA	2787	8	-	Arabidopsis thaliana	part of a module for light response
PMK		HD-Zip 3	GTAAT(G/C)ATTAC	2235	9.5	-	Arabidopsis thaliana	protein binding site
PMK		MBS	CAACTG	2276	6	-	Arabidopsis thaliana	MYB binding site involved in drought-inducibility
PMK		MBS	CAACTG	2949	6	-	Arabidopsis thaliana	MYB binding site involved in drought-inducibility
PMK			motif_sequence	56	4	+	organism	short_function
PMK			motif_sequence	61	4	+	organism	short_function
PMK			motif_sequence	322	4	+	organism	short_function
PMK			motif_sequence	563	4	+	organism	short_function
PMK			motif_sequence	592	4	-	organism	short_function
PMK			motif_sequence	680	4	-	organism	short_function
PMK			motif_sequence	711	4	+	organism	short_function
PMK			motif_sequence	1007	4	+	organism	short_function
PMK			motif_sequence	1124	4	+	organism	short_function
PMK			motif_sequence	2354	4	+	organism	short_function
PMK			motif_sequence	2509	4	-	organism	short_function
PMK			motif_sequence	2889	4	+	organism	short_function
PMK			motif_sequence	2970	4	-	organism	short_function
PMK			motif_sequence	2985	4	-	organism	short_function
PMK			motif_sequence	2992	4	-	organism	short_function
PMK		Box 4	ATTAAT	1492	6	+	Petroselinum crispum	part of a conserved DNA module involved in light responsiveness
PMK		Box 4	ATTAAT	2527	6	-	Petroselinum crispum	part of a conserved DNA module involved in light responsiveness
PMK		G-box	CACGTG	1248	6	+	Arabidopsis thaliana	cis-acting regulatory element involved in light responsiveness
PMK		G-box	CACGTG	2151	6	-	Arabidopsis thaliana	cis-acting regulatory element involved in light responsiveness
PMK		CAT-box	GCCACT	441	6	+	Arabidopsis thaliana	cis-acting regulatory element related to meristem expression
PMK		GT1-motif	GGTTAA	876	6	-	Arabidopsis thaliana	light responsive element
PMK		GT1-motif	GGTTAA	1455	6	-	Arabidopsis thaliana	light responsive element
PMK		TATC-box	TATCCCA	2058	7	+	Oryza sativa	cis-acting element involved in gibberellin-responsiveness
PMK		ERE	ATTTTAAA	1929	8	+	Nicotiana glutinos
PMK		as-1	TGACG	629	5	-	Arabidopsis thaliana
PMK		as-1	TGACG	1133	5	-	Arabidopsis thaliana
PMK		CGTCA-motif	CGTCA	629	5	+	Hordeum vulgare	cis-acting regulatory element involved in the MeJA-responsiveness
PMK		CGTCA-motif	CGTCA	1133	5	+	Hordeum vulgare	cis-acting regulatory element involved in the MeJA-responsiveness
PMK		TGA-element	AACGAC	238	6	-	Brassica oleracea	auxin-responsive element
PMK		MRE	AACCTAA	1794	7	+	Petroselinum crispum	MYB binding site involved in light responsiveness
PMK		ARE	AAACCA	246	6	-	Zea mays	cis-acting regulatory element essential for the anaerobic induction
PMK		ARE	AAACCA	1117	6	-	Zea mays	cis-acting regulatory element essential for the anaerobic induction
PMK		ARE	AAACCA	1425	6	+	Zea mays	cis-acting regulatory element essential for the anaerobic induction
PMK		chs-CMA1a	TTACTTAA	1319	8	+	Daucus carota	part of a light responsive element
PMK		W box	TTGACC	1026	6	-	Arabidopsis thaliana
PMK		G-Box	CACGTG	1248	6	+	Pisum sativum	cis-acting regulatory element involved in light responsiveness
PMK		G-Box	CACGTGAAA	2148	9	-	Pisum sativum	cis-acting regulatory element involved in light responsiveness
PMK		G-Box	CACGTG	2151	6	-	Pisum sativum	cis-acting regulatory element involved in light responsiveness
PMK		TGACG-motif	TGACG	629	5	-	Hordeum vulgare	cis-acting regulatory element involved in the MeJA-responsiveness
PMK		TGACG-motif	TGACG	1133	5	-	Hordeum vulgare	cis-acting regulatory element involved in the MeJA-responsiveness
PMK		TATA-box	TATAAAA	773	7	-	Pisum sativum	core promoter element around -30 of transcription start
PMK		TATA-box	TATAAA	774	6	-	Helianthus annuus	core promoter element around -30 of transcription start
PMK		TATA-box	TATAA	775	5	-	Arabidopsis thaliana	core promoter element around -30 of transcription start
PMK		TATA-box	TATA	776	4	+	Arabidopsis thaliana	core promoter element around -30 of transcription start
PMK		TATA-box	TATAAA	785	6	-	Helianthus annuus	core promoter element around -30 of transcription start
PMK		TATA-box	TATAA	786	5	-	Arabidopsis thaliana	core promoter element around -30 of transcription start
PMK		TATA-box	TATA	787	4	+	Arabidopsis thaliana	core promoter element around -30 of transcription start
PMK		TATA-box	taTATAAAtc	805	9	-	Arabidopsis thaliana	core promoter element around -30 of transcription start
PMK		TATA-box	TATAAAT	806	7	-	Brassica juncea	core promoter element around -30 of transcription start
PMK		TATA-box	TATAAA	807	6	-	Helianthus annuus	core promoter element around -30 of transcription start
PMK		TATA-box	TATATAA	808	7	-	Arabidopsis thaliana	core promoter element around -30 of transcription start
PMK		TATA-box	TATATA	809	6	+	Arabidopsis thaliana	core promoter element around -30 of transcription start
PMK		TATA-box	ATATAT	810	6	+	Brassica napus	core promoter element around -30 of transcription start
PMK		TATA-box	TATA	811	4	+	Arabidopsis thaliana	core promoter element around -30 of transcription start
PMK		TATA-box	TATAAAA	846	7	-	Pisum sativum	core promoter element around -30 of transcription start
PMK		TATA-box	TATAAA	847	6	-	Helianthus annuus	core promoter element around -30 of transcription start
PMK		TATA-box	TATAA	848	5	-	Arabidopsis thaliana	core promoter element around -30 of transcription start
PMK		TATA-box	TATA	849	4	+	Arabidopsis thaliana	core promoter element around -30 of transcription start
PMK		TATA-box	TACAAAA	897	7	-	Oryza sativa	core promoter element around -30 of transcription start
PMK		TATA-box	ATATAT	1377	6	+	Brassica napus	core promoter element around -30 of transcription start
PMK		TATA-box	TATA	1378	4	+	Arabidopsis thaliana	core promoter element around -30 of transcription start
PMK		TATA-box	TATA	1785	4	-	Arabidopsis thaliana	core promoter element around -30 of transcription start
PMK		TATA-box	ATATAA	1914	6	+	Brassica oleracea	core promoter element around -30 of transcription start
PMK		TATA-box	TATA	1915	4	-	Arabidopsis thaliana	core promoter element around -30 of transcription start
PMK		TATA-box	TATTTAAA	1931	8	-	Arabidopsis thaliana	core promoter element around -30 of transcription start
PMK		TATA-box	ATTATA	1988	6	+	Brassica napus	core promoter element around -30 of transcription start
PMK		TATA-box	TATAA	1989	5	-	Arabidopsis thaliana	core promoter element around -30 of transcription start
PMK		TATA-box	TATA	1990	4	-	Arabidopsis thaliana	core promoter element around -30 of transcription start
PMK		TATA-box	TATAAAT	2040	7	-	Brassica juncea	core promoter element around -30 of transcription start
PMK		TATA-box	TATAAA	2041	6	-	Helianthus annuus	core promoter element around -30 of transcription start
PMK		TATA-box	TATAA	2042	5	-	Arabidopsis thaliana	core promoter element around -30 of transcription start
PMK		TATA-box	TATA	2043	4	-	Arabidopsis thaliana	core promoter element around -30 of transcription start
PMK		TATA-box	TATAA	2073	5	-	Arabidopsis thaliana	core promoter element around -30 of transcription start
PMK		TATA-box	TATA	2074	4	-	Arabidopsis thaliana	core promoter element around -30 of transcription start
PMK		TATA-box	ATATAT	2139	6	-	Brassica napus	core promoter element around -30 of transcription start
PMK		TATA-box	TATA	2140	4	-	Arabidopsis thaliana	core promoter element around -30 of transcription start
PMK		TATA-box	TATAAAA	2201	7	-	Pisum sativum	core promoter element around -30 of transcription start
PMK		TATA-box	TATAAA	2202	6	-	Helianthus annuus	core promoter element around -30 of transcription start
PMK		TATA-box	TATAA	2203	5	-	Arabidopsis thaliana	core promoter element around -30 of transcription start
PMK		TATA-box	TATA	2204	4	-	Arabidopsis thaliana	core promoter element around -30 of transcription start
PMK		TATA-box	taTATAAAtc	2265	9	+	Arabidopsis thaliana	core promoter element around -30 of transcription start
PMK		TATA-box	ATATAA	2266	6	+	Brassica oleracea	core promoter element around -30 of transcription start
PMK		TATA-box	TATA	2267	4	-	Arabidopsis thaliana	core promoter element around -30 of transcription start
PMK		TATA-box	TATA	2295	4	-	Arabidopsis thaliana	core promoter element around -30 of transcription start
PMK		TATA-box	TATAA	2300	5	-	Arabidopsis thaliana	core promoter element around -30 of transcription start
PMK		TATA-box	TATA	2301	4	-	Arabidopsis thaliana	core promoter element around -30 of transcription start
PMK		TATA-box	TATA	2645	4	-	Arabidopsis thaliana	core promoter element around -30 of transcription start
PMK		MYB-like sequence	TAACCA	571	6	-	Arabidopsis thaliana
PMK		MYB-like sequence	TAACCA	1456	6	+	Arabidopsis thaliana
PMK		AT~TATA-box	TATATAAA	807	8	-	Arabidopsis thaliana
PMK		AT~TATA-box	TATATA	809	6	+	Arabidopsis thaliana
PMK		ABRE	AACCCGG	780	7	-	Arabidopsis thaliana	cis-acting element involved in the abscisic acid responsiveness
PMK		ABRE	AACCCGG	916	7	-	Arabidopsis thaliana	cis-acting element involved in the abscisic acid responsiveness
PMK		ABRE	CACGTG	1248	6	+	Arabidopsis thaliana	cis-acting element involved in the abscisic acid responsiveness
PMK		ABRE	ACGTG	1249	5	+	Arabidopsis thaliana	cis-acting element involved in the abscisic acid responsiveness
PMK		ABRE	CACGTG	2151	6	-	Arabidopsis thaliana	cis-acting element involved in the abscisic acid responsiveness
PMK		ABRE	ACGTG	2152	5	+	Arabidopsis thaliana	cis-acting element involved in the abscisic acid responsiveness
PMK		Unnamed__4	CTCC	107	4	+	Petroselinum hortense
PMK		Unnamed__4	CTCC	668	4	-	Petroselinum hortense
PMK		Unnamed__4	CTCC	680	4	-	Petroselinum hortense
PMK		Unnamed__4	CTCC	713	4	+	Petroselinum hortense
PMK		Unnamed__4	CTCC	1009	4	+	Petroselinum hortense
PMK		Unnamed__4	CTCC	1518	4	-	Petroselinum hortense
PMK		Unnamed__4	CTCC	1526	4	+	Petroselinum hortense
PMK		Unnamed__4	CTCC	1633	4	-	Petroselinum hortense
PMK		Unnamed__4	CTCC	2509	4	-	Petroselinum hortense
PMK		Myb	TAACTG	1443	6	-	Arabidopsis thaliana
PMK		Myb	CAACTG	2276	6	-	Arabidopsis thaliana
PMK		Myb	CAACTG	2949	6	-	Arabidopsis thaliana
PMK		MYC	CAATTG	297	6	+	Arabidopsis thaliana
PMK		MYC	CATTTG	499	6	-	Arabidopsis thaliana
PMK		MYC	CAATTG	1619	6	-	Arabidopsis thaliana
PMK		MYC	CATGTG	1668	6	+	Arabidopsis thaliana
PMK		MYC	CATTTG	1964	6	-	Arabidopsis thaliana
PMK		MYC	CATTTG	2020	6	-	Arabidopsis thaliana
PMK		MYC	CAATTG	2516	6	-	Arabidopsis thaliana
PMK		MYC	CATGTG	2743	6	+	Arabidopsis thaliana
PMK		TCA	TCATCTTCAT	587	9	-	Pisum sativum
PMK		TCA	TCATCTTCAT	703	9	+	Pisum sativum
PMK		TC-rich repeats	ATTCTCTAAC	1450	9	+	Nicotiana tabacum	cis-acting element involved in defense and stress responsiveness
PMK		P-box	CCTTTTG	2320	7	-	Oryza sativa	gibberellin-responsive element
TDC		Box 4	ATTAAT	467	6	+	Petroselinum crispum	part of a conserved DNA module involved in light responsiveness
TDC		CTAG-motif	ACTAGCAGAA	2829	9	-	Avena sativa
TDC		CAT-box	GCCACT	492	6	-	Arabidopsis thaliana	cis-acting regulatory element related to meristem expression
TDC		G-box	GCCACGTGGA	488	9	-	Arabidopsis thaliana	cis-acting regulatory element involved in light responsiveness
TDC		G-box	CACGTG	2084	6	-	Arabidopsis thaliana	cis-acting regulatory element involved in light responsiveness
TDC		GT1-motif	GGTTAA	231	6	+	Arabidopsis thaliana	light responsive element
TDC		GT1-motif	GGTTAA	1591	6	-	Arabidopsis thaliana	light responsive element
TDC		circadian	CAAAGATATC	2047	9	+	Lycopersicon esculentum	cis-acting regulatory element involved in circadian control
TDC		Myc	TCTCTTA	2150	7	+	Arabidopsis thaliana
TDC		Myc	TCTCTTA	2197	7	+	Arabidopsis thaliana
TDC		ERE	ATTTTAAA	885	8	+	Nicotiana glutinos
TDC		as-1	TGACG	1022	5	-	Arabidopsis thaliana
TDC		chs-CMA2a	TCACTTGA	597	8	+	Petroselinum crispum	part of a light responsive element
TDC		AAGAA-motif	GAAAGAA	2870	7	+	Avena sativa
TDC		STRE	AGGGG	532	5	+	Arabidopsis thaliana
TDC		MYB	CAACAG	167	6	+	Arabidopsis thaliana
TDC		MYB	CAACCA	2120	6	+	Arabidopsis thaliana
TDC		MYB	CAACCA	2298	6	+	Arabidopsis thaliana
TDC		TCT-motif	TCTTAC	407	6	-	Arabidopsis thaliana	part of a light responsive element
TDC		CAAT-box	CAAT	24	4	-	Nicotiana glutinosa
TDC		CAAT-box	CCAAT	51	5	+	Arabidopsis thaliana	common cis-acting element in promoter and enhancer regions
TDC		CAAT-box	CAAT	52	4	+	Nicotiana glutinosa
TDC		CAAT-box	CAAT	59	4	-	Nicotiana glutinosa
TDC		CAAT-box	CAAT	71	4	+	Nicotiana glutinosa
TDC		CAAT-box	CAAT	73	4	-	Nicotiana glutinosa
TDC		CAAT-box	CAAT	153	4	-	Nicotiana glutinosa
TDC		CAAT-box	CAAAT	302	5	+	Pisum sativum	common cis-acting element in promoter and enhancer regions
TDC		CAAT-box	CCAAT	460	5	+	Arabidopsis thaliana	common cis-acting element in promoter and enhancer regions
TDC		CAAT-box	CAAT	461	4	+	Nicotiana glutinosa
TDC		CAAT-box	CCAAT	475	5	+	Arabidopsis thaliana	common cis-acting element in promoter and enhancer regions
TDC		CAAT-box	CAAT	476	4	+	Nicotiana glutinosa
TDC		CAAT-box	CAAAT	562	5	+	Pisum sativum	common cis-acting element in promoter and enhancer regions
TDC		CAAT-box	CCAAT	658	5	+	Arabidopsis thaliana	common cis-acting element in promoter and enhancer regions
TDC		CAAT-box	CAAT	659	4	+	Nicotiana glutinosa
TDC		CAAT-box	CAAAT	707	5	+	Pisum sativum	common cis-acting element in promoter and enhancer regions
TDC		CAAT-box	CAAAT	785	5	+	Pisum sativum	common cis-acting element in promoter and enhancer regions
TDC		CAAT-box	CAAT	845	4	-	Nicotiana glutinosa
TDC		CAAT-box	CAAAT	865	5	+	Pisum sativum	common cis-acting element in promoter and enhancer regions
TDC		CAAT-box	CAAT	892	4	-	Nicotiana glutinosa
TDC		CAAT-box	CCAAT	1034	5	+	Arabidopsis thaliana	common cis-acting element in promoter and enhancer regions
TDC		CAAT-box	CAAT	1035	4	+	Nicotiana glutinosa
TDC		CAAT-box	CCAAT	1138	5	+	Arabidopsis thaliana	common cis-acting element in promoter and enhancer regions
TDC		CAAT-box	CAAT	1139	4	+	Nicotiana glutinosa
TDC		CAAT-box	CAAT	1187	4	+	Nicotiana glutinosa
TDC		CAAT-box	CCAAT	1300	5	-	Arabidopsis thaliana	common cis-acting element in promoter and enhancer regions
TDC		CAAT-box	CAAAT	1326	5	-	Pisum sativum	common cis-acting element in promoter and enhancer regions
TDC		CAAT-box	CAAT	1336	4	+	Nicotiana glutinosa
TDC		CAAT-box	CAAT	1445	4	-	Nicotiana glutinosa
TDC		CAAT-box	CAAT	1642	4	-	Nicotiana glutinosa
TDC		CAAT-box	CAAAT	1650	5	-	Pisum sativum	common cis-acting element in promoter and enhancer regions
TDC		CAAT-box	CAAAT	1794	5	+	Pisum sativum	common cis-acting element in promoter and enhancer regions
TDC		CAAT-box	CAAT	1920	4	-	Nicotiana glutinosa
TDC		CAAT-box	CAAT	1942	4	+	Nicotiana glutinosa
TDC		CAAT-box	CAAT	1955	4	+	Nicotiana glutinosa
TDC		CAAT-box	CAAT	2065	4	+	Nicotiana glutinosa
TDC		CAAT-box	CAAAT	2130	5	+	Pisum sativum	common cis-acting element in promoter and enhancer regions
TDC		CAAT-box	CAAAT	2137	5	-	Pisum sativum	common cis-acting element in promoter and enhancer regions
TDC		CAAT-box	CAAT	2271	4	-	Nicotiana glutinosa
TDC		CAAT-box	CAAAT	2306	5	+	Pisum sativum	common cis-acting element in promoter and enhancer regions
TDC		CAAT-box	CAAT	2334	4	+	Nicotiana glutinosa
TDC		CAAT-box	CAAT	2567	4	+	Nicotiana glutinosa
TDC		CAAT-box	CAAT	2575	4	+	Nicotiana glutinosa
TDC		CAAT-box	CAAT	2640	4	+	Nicotiana glutinosa
TDC		CAAT-box	CAAT	2719	4	+	Nicotiana glutinosa
TDC		CAAT-box	CAAT	2776	4	+	Nicotiana glutinosa
TDC		CAAT-box	CAAT	2781	4	-	Nicotiana glutinosa
TDC		CAAT-box	CAAT	2802	4	-	Nicotiana glutinosa
TDC		CAAT-box	CAAAT	2887	5	+	Pisum sativum	common cis-acting element in promoter and enhancer regions
TDC		AT-rich element	ATAGAAATCAA	2048	10	+	Glycine max	binding site of AT-rich DNA binding protein (ATBP-1)
TDC		AE-box	AGAAACAA	25	8	-	Arabidopsis thaliana	part of a module for light response
TDC		Sp1	GGGCGG	1607	6	+	Oryza sativa	light responsive element
TDC			motif_sequence	113	4	+	organism	short_function
TDC			motif_sequence	590	4	+	organism	short_function
TDC			motif_sequence	718	4	-	organism	short_function
TDC			motif_sequence	900	4	-	organism	short_function
TDC			motif_sequence	918	4	+	organism	short_function
TDC			motif_sequence	1377	4	+	organism	short_function
TDC			motif_sequence	1721	4	-	organism	short_function
TDC			motif_sequence	1748	4	+	organism	short_function
TDC			motif_sequence	1830	4	-	organism	short_function
TDC			motif_sequence	1843	4	+	organism	short_function
TDC			motif_sequence	1857	4	+	organism	short_function
TDC			motif_sequence	2035	4	+	organism	short_function
TDC			motif_sequence	2248	4	+	organism	short_function
TDC			motif_sequence	2287	4	+	organism	short_function
TDC			motif_sequence	2358	4	-	organism	short_function
TDC			motif_sequence	2688	4	+	organism	short_function
TDC			motif_sequence	2918	4	+	organism	short_function
TDC		Myb-binding site	CAACAG	167	6	+	Nicotiana tabacum
TDC		Unnamed__1	CGTGG	2763	5	-	Zea mays
TDC		ABRE	AACCCGG	352	7	-	Arabidopsis thaliana	cis-acting element involved in the abscisic acid responsiveness
TDC		ABRE	AACCCGG	363	7	+	Arabidopsis thaliana	cis-acting element involved in the abscisic acid responsiveness
TDC		ABRE	AACCCGG	1069	7	+	Arabidopsis thaliana	cis-acting element involved in the abscisic acid responsiveness
TDC		ABRE	CACGTG	2084	6	-	Arabidopsis thaliana	cis-acting element involved in the abscisic acid responsiveness
TDC		ABRE	ACGTG	2085	5	+	Arabidopsis thaliana	cis-acting element involved in the abscisic acid responsiveness
TDC		ABRE	ACGTG	2093	5	-	Arabidopsis thaliana	cis-acting element involved in the abscisic acid responsiveness
TDC		ABRE	AACCCGG	2733	7	+	Arabidopsis thaliana	cis-acting element involved in the abscisic acid responsiveness
TDC		Unnamed__4	CTCC	115	4	+	Petroselinum hortense
TDC		Unnamed__4	CTCC	802	4	+	Petroselinum hortense
TDC		Unnamed__4	CTCC	805	4	+	Petroselinum hortense
TDC		Unnamed__4	CTCC	1463	4	-	Petroselinum hortense
TDC		Unnamed__4	CTCC	2324	4	+	Petroselinum hortense
TDC		Unnamed__4	CTCC	2378	4	-	Petroselinum hortense
TDC		Unnamed__4	CTCC	2476	4	-	Petroselinum hortense
TDC		Unnamed__4	CTCC	2920	4	+	Petroselinum hortense
TDC		Unnamed__4	CTCC	2971	4	+	Petroselinum hortense
TDC		Unnamed__4	CTCC	2974	4	+	Petroselinum hortense
TDC		Myb	TAACTG	575	6	-	Arabidopsis thaliana
TDC		Myb	TAACTG	1412	6	-	Arabidopsis thaliana
TDC		MYB recognition site	CCGTTG	1052	6	-	Arabidopsis thaliana
TDC		MYB recognition site	CCGTTG	2440	6	+	Arabidopsis thaliana
TDC		MYC	CAATTG	71	6	+	Arabidopsis thaliana
TDC		MYC	CATGTG	482	6	+	Arabidopsis thaliana
TDC		MYC	CATTTG	865	6	-	Arabidopsis thaliana
TDC		MYC	CATTTG	1649	6	+	Arabidopsis thaliana
TDC		TCA	TCATCTTCAT	588	9	+	Pisum sativum
TDC		P-box	CCTTTTG	1025	7	-	Oryza sativa	gibberellin-responsive element
TDC		P-box	CCTTTTG	2558	7	+	Oryza sativa	gibberellin-responsive element
TDC		CCAAT-box	CAACGG	1052	6	+	Hordeum vulgare	MYBHv1 binding site
TDC		CCAAT-box	CAACGG	2440	6	-	Hordeum vulgare	MYBHv1 binding site
TDC		HD-Zip 1	CAAT(A/T)ATTG	2776	8.5	-	Arabidopsis thaliana	element involved in differentiation of the palisade mesophyll cells
TDC		CGTCA-motif	CGTCA	1022	5	+	Hordeum vulgare	cis-acting regulatory element involved in the MeJA-responsiveness
TDC		TGA-element	AACGAC	1994	6	-	Brassica oleracea	auxin-responsive element
TDC		ARE	AAACCA	1048	6	+	Zea mays	cis-acting regulatory element essential for the anaerobic induction
TDC		ARE	AAACCA	1115	6	+	Zea mays	cis-acting regulatory element essential for the anaerobic induction
TDC		G-Box	CACGTG	2084	6	-	Pisum sativum	cis-acting regulatory element involved in light responsiveness
TDC		G-Box	CACGTT	2093	6	+	Pisum sativum	cis-acting regulatory element involved in light responsiveness
TDC		TATA	TATAAAAT	3	8	-	Arabidopsis thaliana
TDC		AT~TATA-box	TATATA	278	6	+	Arabidopsis thaliana
TDC		AT~TATA-box	TATATA	1798	6	-	Arabidopsis thaliana
TDC		AT~TATA-box	TATATA	1907	6	-	Arabidopsis thaliana
TDC		AT~TATA-box	TATATA	1909	6	-	Arabidopsis thaliana
TDC		AT~TATA-box	TATATA	1911	6	-	Arabidopsis thaliana
TDC		AT~TATA-box	TATATA	1913	6	-	Arabidopsis thaliana
TDC		AT~TATA-box	TATATA	1915	6	-	Arabidopsis thaliana
TDC		AT~TATA-box	TATATA	2846	6	-	Arabidopsis thaliana
TDC		AT~TATA-box	TATATA	2848	6	-	Arabidopsis thaliana
TDC		TGACG-motif	TGACG	1022	5	-	Hordeum vulgare	cis-acting regulatory element involved in the MeJA-responsiveness
TDC		TATA-box	TATAAAA	4	7	-	Pisum sativum	core promoter element around -30 of transcription start
TDC		TATA-box	TATAAA	5	6	-	Helianthus annuus	core promoter element around -30 of transcription start
TDC		TATA-box	TATAA	6	5	-	Arabidopsis thaliana	core promoter element around -30 of transcription start
TDC		TATA-box	TATA	7	4	+	Arabidopsis thaliana	core promoter element around -30 of transcription start
TDC		TATA-box	TATA	138	4	+	Arabidopsis thaliana	core promoter element around -30 of transcription start
TDC		TATA-box	TACAAAA	209	7	+	Oryza sativa	core promoter element around -30 of transcription start
TDC		TATA-box	TATACA	276	6	-	Helianthus annuus	core promoter element around -30 of transcription start
TDC		TATA-box	TATATA	278	6	+	Arabidopsis thaliana	core promoter element around -30 of transcription start
TDC		TATA-box	TATA	280	4	+	Arabidopsis thaliana	core promoter element around -30 of transcription start
TDC		TATA-box	TATACA	395	6	-	Helianthus annuus	core promoter element around -30 of transcription start
TDC		TATA-box	TATA	397	4	+	Arabidopsis thaliana	core promoter element around -30 of transcription start
TDC		TATA-box	ATATAT	463	6	+	Brassica napus	core promoter element around -30 of transcription start
TDC		TATA-box	TATA	464	4	+	Arabidopsis thaliana	core promoter element around -30 of transcription start
TDC		TATA-box	TATA	1002	4	+	Arabidopsis thaliana	core promoter element around -30 of transcription start
TDC		TATA-box	TATA	1199	4	+	Arabidopsis thaliana	core promoter element around -30 of transcription start
TDC		TATA-box	TATAA	1502	5	-	Arabidopsis thaliana	core promoter element around -30 of transcription start
TDC		TATA-box	TATA	1503	4	-	Arabidopsis thaliana	core promoter element around -30 of transcription start
TDC		TATA-box	TATAAAA	1566	7	-	Pisum sativum	core promoter element around -30 of transcription start
TDC		TATA-box	TATAAA	1567	6	-	Helianthus annuus	core promoter element around -30 of transcription start
TDC		TATA-box	TATAA	1568	5	-	Arabidopsis thaliana	core promoter element around -30 of transcription start
TDC		TATA-box	TATA	1569	4	-	Arabidopsis thaliana	core promoter element around -30 of transcription start
TDC		TATA-box	TACAAAA	1626	7	-	Oryza sativa	core promoter element around -30 of transcription start
TDC		TATA-box	TATA	1704	4	-	Arabidopsis thaliana	core promoter element around -30 of transcription start
TDC		TATA-box	TATAA	1710	5	-	Arabidopsis thaliana	core promoter element around -30 of transcription start
TDC		TATA-box	TATA	1711	4	-	Arabidopsis thaliana	core promoter element around -30 of transcription start
TDC		TATA-box	ATTATA	1725	6	+	Brassica napus	core promoter element around -30 of transcription start
TDC		TATA-box	TATAA	1726	5	-	Arabidopsis thaliana	core promoter element around -30 of transcription start
TDC		TATA-box	TATA	1727	4	-	Arabidopsis thaliana	core promoter element around -30 of transcription start
TDC		TATA-box	ATATAT	1797	6	-	Brassica napus	core promoter element around -30 of transcription start
TDC		TATA-box	TATATA	1798	6	-	Arabidopsis thaliana	core promoter element around -30 of transcription start
TDC		TATA-box	ATATAT	1799	6	-	Brassica napus	core promoter element around -30 of transcription start
TDC		TATA-box	TATA	1800	4	-	Arabidopsis thaliana	core promoter element around -30 of transcription start
TDC		TATA-box	TATA	1863	4	-	Arabidopsis thaliana	core promoter element around -30 of transcription start
TDC		TATA-box	TATATAA	1906	7	-	Arabidopsis thaliana	core promoter element around -30 of transcription start
TDC		TATA-box	TATATA	1907	6	-	Arabidopsis thaliana	core promoter element around -30 of transcription start
TDC		TATA-box	ATATAT	1908	6	-	Brassica napus	core promoter element around -30 of transcription start
TDC		TATA-box	TATATA	1909	6	-	Arabidopsis thaliana	core promoter element around -30 of transcription start
TDC		TATA-box	ATATAT	1910	6	-	Brassica napus	core promoter element around -30 of transcription start
TDC		TATA-box	TATATA	1911	6	-	Arabidopsis thaliana	core promoter element around -30 of transcription start
TDC		TATA-box	ATATAT	1912	6	-	Brassica napus	core promoter element around -30 of transcription start
TDC		TATA-box	TATATA	1913	6	-	Arabidopsis thaliana	core promoter element around -30 of transcription start
TDC		TATA-box	ATATAT	1914	6	-	Brassica napus	core promoter element around -30 of transcription start
TDC		TATA-box	TATATA	1915	6	-	Arabidopsis thaliana	core promoter element around -30 of transcription start
TDC		TATA-box	ATATAT	1916	6	-	Brassica napus	core promoter element around -30 of transcription start
TDC		TATA-box	TATA	1917	4	-	Arabidopsis thaliana	core promoter element around -30 of transcription start
TDC		TATA-box	TATA	2068	4	-	Arabidopsis thaliana	core promoter element around -30 of transcription start
TDC		TATA-box	ccTATAAAaa	2153	9	+	Arabidopsis thaliana	core promoter element around -30 of transcription start
TDC		TATA-box	TATAA	2154	5	-	Arabidopsis thaliana	core promoter element around -30 of transcription start
TDC		TATA-box	TATA	2155	4	-	Arabidopsis thaliana	core promoter element around -30 of transcription start
TDC		TATA-box	TATA	2264	4	-	Arabidopsis thaliana	core promoter element around -30 of transcription start
TDC		TATA-box	TAAAGATT	2392	8	-	Arabidopsis thaliana	core promoter element around -30 of transcription start
TDC		TATA-box	ATTATA	2523	6	+	Brassica napus	core promoter element around -30 of transcription start
TDC		TATA-box	TATAA	2524	5	-	Arabidopsis thaliana	core promoter element around -30 of transcription start
TDC		TATA-box	TATA	2525	4	-	Arabidopsis thaliana	core promoter element around -30 of transcription start
TDC		TATA-box	taTATAAAtc	2842	9	-	Arabidopsis thaliana	core promoter element around -30 of transcription start
TDC		TATA-box	ATTATA	2844	6	+	Brassica napus	core promoter element around -30 of transcription start
TDC		TATA-box	TATATAA	2845	7	-	Arabidopsis thaliana	core promoter element around -30 of transcription start
TDC		TATA-box	TATATA	2846	6	-	Arabidopsis thaliana	core promoter element around -30 of transcription start
TDC		TATA-box	ATATAT	2847	6	-	Brassica napus	core promoter element around -30 of transcription start
TDC		TATA-box	TATATA	2848	6	-	Arabidopsis thaliana	core promoter element around -30 of transcription start
TDC		TATA-box	TATA	2850	4	-	Arabidopsis thaliana	core promoter element around -30 of transcription start
MK		Box 4	ATTAAT	1573	6	-	Petroselinum crispum	part of a conserved DNA module involved in light responsiveness
MK		Box 4	ATTAAT	1577	6	-	Petroselinum crispum	part of a conserved DNA module involved in light responsiveness
MK		Box 4	ATTAAT	2278	6	-	Petroselinum crispum	part of a conserved DNA module involved in light responsiveness
MK		WUN-motif	AAATTACT	2139	8	-	Nicotiana glutinosa
MK		GT1-motif	GGTTAAT	1065	7	-	Avena sativa	light responsive element
MK		GT1-motif	GGTTAA	1066	6	-	Arabidopsis thaliana	light responsive element
MK		GT1-motif	GGTTAA	1545	6	-	Arabidopsis thaliana	light responsive element
MK		CAT-box	GCCACT	213	6	+	Arabidopsis thaliana	cis-acting regulatory element related to meristem expression
MK		ERE	ATTTTAAA	2558	8	+	Nicotiana glutinos
MK		as-1	TGACG	792	5	+	Arabidopsis thaliana
MK		AAGAA-motif	GAAAGAA	369	7	-	Avena sativa
MK		AAGAA-motif	GAAAGAA	755	7	+	Avena sativa
MK		AAGAA-motif	GAAAGAA	810	7	+	Avena sativa
MK		AAGAA-motif	GAAAGAA	832	7	+	Avena sativa
MK		AAGAA-motif	gGTAAAGAAA	1886	9	-	Avena sativa
MK		MYB	CAACAG	1208	6	-	Arabidopsis thaliana
MK		MYB	TAACCA	1745	6	-	Arabidopsis thaliana
MK		MYB	TAACCA	2116	6	-	Arabidopsis thaliana
MK		MYB	CAACAG	2899	6	-	Arabidopsis thaliana
MK		STRE	AGGGG	992	5	+	Arabidopsis thaliana
MK		STRE	AGGGG	2591	5	-	Arabidopsis thaliana
MK		CAAT-box	CAAT	130	4	+	Nicotiana glutinosa
MK		CAAT-box	CAAT	132	4	-	Nicotiana glutinosa
MK		CAAT-box	CAAT	233	4	+	Nicotiana glutinosa
MK		CAAT-box	CAAT	301	4	-	Nicotiana glutinosa
MK		CAAT-box	CAAAT	323	5	+	Pisum sativum	common cis-acting element in promoter and enhancer regions
MK		CAAT-box	CAAT	352	4	+	Nicotiana glutinosa
MK		CAAT-box	TGCAAATCT	360	9	-	Brassica juncea	common cis-acting element in promoter and enhancer regions
MK		CAAT-box	CAAAT	362	5	-	Pisum sativum	common cis-acting element in promoter and enhancer regions
MK		CAAT-box	CAAAT	397	5	+	Pisum sativum	common cis-acting element in promoter and enhancer regions
MK		CAAT-box	CAAAT	406	5	+	Pisum sativum	common cis-acting element in promoter and enhancer regions
MK		CAAT-box	CAAAT	467	5	+	Pisum sativum	common cis-acting element in promoter and enhancer regions
MK		CAAT-box	CAAAT	470	5	-	Pisum sativum	common cis-acting element in promoter and enhancer regions
MK		CAAT-box	CAAT	500	4	+	Nicotiana glutinosa
MK		CAAT-box	CAAT	537	4	+	Nicotiana glutinosa
MK		CAAT-box	CAAAT	621	5	+	Pisum sativum	common cis-acting element in promoter and enhancer regions
MK		CAAT-box	CAAT	651	4	+	Nicotiana glutinosa
MK		CAAT-box	CCAAT	665	5	-	Arabidopsis thaliana	common cis-acting element in promoter and enhancer regions
MK		CAAT-box	CAAT	690	4	-	Nicotiana glutinosa
MK		CAAT-box	CAAT	1078	4	-	Nicotiana glutinosa
MK		CAAT-box	CAAT	1150	4	-	Nicotiana glutinosa
MK		CAAT-box	CAAAT	1220	5	+	Pisum sativum	common cis-acting element in promoter and enhancer regions
MK		CAAT-box	CAAAT	1252	5	-	Pisum sativum	common cis-acting element in promoter and enhancer regions
MK		CAAT-box	CAAT	1314	4	-	Nicotiana glutinosa
MK		CAAT-box	CAAT	1335	4	+	Nicotiana glutinosa
MK		CAAT-box	CAAT	1343	4	+	Nicotiana glutinosa
MK		CAAT-box	CAAAT	1345	5	-	Pisum sativum	common cis-acting element in promoter and enhancer regions
MK		CAAT-box	CAAT	1366	4	-	Nicotiana glutinosa
MK		CAAT-box	CAAT	1469	4	-	Nicotiana glutinosa
MK		CAAT-box	CAAT	1482	4	+	Nicotiana glutinosa
MK		CAAT-box	CAAT	1489	4	+	Nicotiana glutinosa
MK		CAAT-box	CAAT	1497	4	+	Nicotiana glutinosa
MK		CAAT-box	CAAAT	1532	5	-	Pisum sativum	common cis-acting element in promoter and enhancer regions
MK		CAAT-box	CAAT	1540	4	+	Nicotiana glutinosa
MK		CAAT-box	CAAT	1568	4	-	Nicotiana glutinosa
MK		CAAT-box	CAAT	1589	4	+	Nicotiana glutinosa
MK		CAAT-box	CCAAT	1595	5	-	Arabidopsis thaliana	common cis-acting element in promoter and enhancer regions
MK		CAAT-box	CAAT	1600	4	+	Nicotiana glutinosa
MK		CAAT-box	CCAAT	1649	5	-	Arabidopsis thaliana	common cis-acting element in promoter and enhancer regions
MK		CAAT-box	CAAAT	1675	5	-	Pisum sativum	common cis-acting element in promoter and enhancer regions
MK		CAAT-box	CAAAT	1760	5	+	Pisum sativum	common cis-acting element in promoter and enhancer regions
MK		CAAT-box	CAAT	1763	4	-	Nicotiana glutinosa
MK		CAAT-box	CAAT	1771	4	+	Nicotiana glutinosa
MK		CAAT-box	CAAAT	1804	5	-	Pisum sativum	common cis-acting element in promoter and enhancer regions
MK		CAAT-box	CAAT	1851	4	+	Nicotiana glutinosa
MK		CAAT-box	CAAT	1913	4	+	Nicotiana glutinosa
MK		CAAT-box	CAAT	1965	4	-	Nicotiana glutinosa
MK		CAAT-box	CAAAT	1985	5	+	Pisum sativum	common cis-acting element in promoter and enhancer regions
MK		CAAT-box	CCAAT	2065	5	+	Arabidopsis thaliana	common cis-acting element in promoter and enhancer regions
MK		CAAT-box	CAAT	2066	4	+	Nicotiana glutinosa
MK		CAAT-box	CAAT	2132	4	-	Nicotiana glutinosa
MK		CAAT-box	CCAAT	2227	5	-	Arabidopsis thaliana	common cis-acting element in promoter and enhancer regions
MK		CAAT-box	CAAAT	2271	5	-	Pisum sativum	common cis-acting element in promoter and enhancer regions
MK		CAAT-box	CAAT	2276	4	+	Nicotiana glutinosa
MK		CAAT-box	CAAT	2282	4	-	Nicotiana glutinosa
MK		CAAT-box	CAAT	2314	4	-	Nicotiana glutinosa
MK		CAAT-box	CAAT	2339	4	+	Nicotiana glutinosa
MK		CAAT-box	CAAT	2419	4	+	Nicotiana glutinosa
MK		CAAT-box	CAAT	2545	4	+	Nicotiana glutinosa
MK		CAAT-box	CCCAATTT	2583	8	+	Arabidopsis thaliana	common cis-acting element in promoter and enhancer regions
MK		CAAT-box	CCAAT	2584	5	+	Arabidopsis thaliana	common cis-acting element in promoter and enhancer regions
MK		CAAT-box	CAAT	2585	4	+	Nicotiana glutinosa
MK		CAAT-box	CAAT	2650	4	-	Nicotiana glutinosa
MK		CAAT-box	CAAT	2731	4	-	Nicotiana glutinosa
MK		CAAT-box	CAAT	2851	4	-	Nicotiana glutinosa
MK		CAAT-box	CAAAT	2856	5	-	Pisum sativum	common cis-acting element in promoter and enhancer regions
MK		CAAT-box	CAAAT	2910	5	+	Pisum sativum	common cis-acting element in promoter and enhancer regions
MK		CAAT-box	CAAT	2948	4	+	Nicotiana glutinosa
MK		AT-rich element	ATAGAAATCAA	859	11	+	Glycine max	binding site of AT-rich DNA binding protein (ATBP-1)
MK		GATA-motif	GATAGGA	2793	7	+	Arabidopsis thaliana	part of a light responsive element
MK		AE-box	AGAAACAA	869	8	+	Arabidopsis thaliana	part of a module for light response
MK		TCA-element	CCATCTTTTT	2938	9	+	Nicotiana tabacum	cis-acting element involved in salicylic acid responsiveness
MK		MBS	CAACTG	143	6	+	Arabidopsis thaliana	MYB binding site involved in drought-inducibility
MK		MBS	CAACTG	223	6	+	Arabidopsis thaliana	MYB binding site involved in drought-inducibility
MK		MBS	CAACTG	2666	6	-	Arabidopsis thaliana	MYB binding site involved in drought-inducibility
MK			motif_sequence	176	4	+	organism	short_function
MK			motif_sequence	235	4	+	organism	short_function
MK			motif_sequence	354	4	+	organism	short_function
MK			motif_sequence	433	4	+	organism	short_function
MK			motif_sequence	759	4	-	organism	short_function
MK			motif_sequence	825	4	-	organism	short_function
MK			motif_sequence	1045	4	-	organism	short_function
MK			motif_sequence	1227	4	+	organism	short_function
MK			motif_sequence	1404	4	+	organism	short_function
MK			motif_sequence	1499	4	+	organism	short_function
MK			motif_sequence	1779	4	+	organism	short_function
MK			motif_sequence	1793	4	-	organism	short_function
MK			motif_sequence	1881	4	-	organism	short_function
MK			motif_sequence	2198	4	-	organism	short_function
MK			motif_sequence	2230	4	-	organism	short_function
MK			motif_sequence	2368	4	+	organism	short_function
MK			motif_sequence	2460	4	+	organism	short_function
MK			motif_sequence	2634	4	-	organism	short_function
MK			motif_sequence	2986	4	+	organism	short_function
MK		Unnamed__1	CGTGG	2738	5	-	Zea mays
MK		Unnamed__1	GAATTTAATTAA	2905	11	-	Glycine max	60K protein binding site
MK		Myb-binding site	CAACAG	1208	6	-	Nicotiana tabacum
MK		Myb-binding site	CAACAG	2899	6	-	Nicotiana tabacum
MK		MBSI	TTTTTACGGTTA	1067	11	-	Petunia hybrida	MYB binding site involved in flavonoid biosynthetic genes regulation
MK		Unnamed__4	CTCC	178	4	+	Petroselinum hortense
MK		Unnamed__4	CTCC	723	4	-	Petroselinum hortense
MK		Unnamed__4	CTCC	735	4	-	Petroselinum hortense
MK		Unnamed__4	CTCC	822	4	-	Petroselinum hortense
MK		Unnamed__4	CTCC	1052	4	-	Petroselinum hortense
MK		Unnamed__4	CTCC	1105	4	+	Petroselinum hortense
MK		Unnamed__4	CTCC	1383	4	+	Petroselinum hortense
MK		Unnamed__4	CTCC	1564	4	+	Petroselinum hortense
MK		Unnamed__4	CTCC	1658	4	+	Petroselinum hortense
MK		Unnamed__4	CTCC	1781	4	+	Petroselinum hortense
MK		Unnamed__4	CTCC	2230	4	-	Petroselinum hortense
MK		Unnamed__4	CTCC	2462	4	+	Petroselinum hortense
MK		Unnamed__4	CTCC	2988	4	+	Petroselinum hortense
MK		Myb	CAACTG	143	6	+	Arabidopsis thaliana
MK		Myb	CAACTG	223	6	+	Arabidopsis thaliana
MK		Myb	TAACTG	241	6	-	Arabidopsis thaliana
MK		Myb	TAACTG	2076	6	-	Arabidopsis thaliana
MK		Myb	CAACTG	2666	6	-	Arabidopsis thaliana
MK		MYC	CAATTG	130	6	+	Arabidopsis thaliana
MK		MYC	CATTTG	1531	6	+	Arabidopsis thaliana
MK		MYC	CATTTG	2855	6	+	Arabidopsis thaliana
MK		TC-rich repeats	GTTTTCTTAC	1093	9	+	Nicotiana tabacum	cis-acting element involved in defense and stress responsiveness
MK		O2-site	GATGA(C/T)(A/G)TG(A/G)	2235	8	+	Zea mays	cis-acting regulatory element involved in zein metabolism regulation
MK		ARE	AAACCA	658	6	+	Zea mays	cis-acting regulatory element essential for the anaerobic induction
MK		ARE	AAACCA	667	6	-	Zea mays	cis-acting regulatory element essential for the anaerobic induction
MK		ARE	AAACCA	1420	6	+	Zea mays	cis-acting regulatory element essential for the anaerobic induction
MK		ARE	AAACCA	2321	6	-	Zea mays	cis-acting regulatory element essential for the anaerobic induction
MK		CGTCA-motif	CGTCA	792	5	-	Hordeum vulgare	cis-acting regulatory element involved in the MeJA-responsiveness
MK		TGA-element	AACGAC	2190	6	-	Brassica oleracea	auxin-responsive element
MK		TGA-element	AACGAC	2334	6	+	Brassica oleracea	auxin-responsive element
MK		MRE	AACCTAA	2439	7	-	Petroselinum crispum	MYB binding site involved in light responsiveness
MK		W box	TTGACC	1416	6	-	Arabidopsis thaliana
MK		TATA	TATAAAAT	1195	8	+	Arabidopsis thaliana
MK		TGACG-motif	TGACG	792	5	+	Hordeum vulgare	cis-acting regulatory element involved in the MeJA-responsiveness
MK		TATA-box	ATTATA	158	6	+	Brassica napus	core promoter element around -30 of transcription start
MK		TATA-box	TATAA	159	5	-	Arabidopsis thaliana	core promoter element around -30 of transcription start
MK		TATA-box	TATA	160	4	+	Arabidopsis thaliana	core promoter element around -30 of transcription start
MK		TATA-box	TATTTAAA	188	8	-	Arabidopsis thaliana	core promoter element around -30 of transcription start
MK		TATA-box	TATA	218	4	+	Arabidopsis thaliana	core promoter element around -30 of transcription start
MK		TATA-box	TATA	295	4	+	Arabidopsis thaliana	core promoter element around -30 of transcription start
MK		TATA-box	ATATAA	418	6	+	Brassica oleracea	core promoter element around -30 of transcription start
MK		TATA-box	TATA	419	4	+	Arabidopsis thaliana	core promoter element around -30 of transcription start
MK		TATA-box	TACAAAA	436	7	+	Oryza sativa	core promoter element around -30 of transcription start
MK		TATA-box	ATATAA	511	6	+	Brassica oleracea	core promoter element around -30 of transcription start
MK		TATA-box	TATA	512	4	+	Arabidopsis thaliana	core promoter element around -30 of transcription start
MK		TATA-box	ATATAA	586	6	+	Brassica oleracea	core promoter element around -30 of transcription start
MK		TATA-box	TATA	587	4	+	Arabidopsis thaliana	core promoter element around -30 of transcription start
MK		TATA-box	TATAAAA	626	7	-	Pisum sativum	core promoter element around -30 of transcription start
MK		TATA-box	TATAAA	627	6	-	Helianthus annuus	core promoter element around -30 of transcription start
MK		TATA-box	TATAA	628	5	-	Arabidopsis thaliana	core promoter element around -30 of transcription start
MK		TATA-box	TATA	629	4	+	Arabidopsis thaliana	core promoter element around -30 of transcription start
MK		TATA-box	ATTATA	909	6	+	Brassica napus	core promoter element around -30 of transcription start
MK		TATA-box	TATAA	910	5	-	Arabidopsis thaliana	core promoter element around -30 of transcription start
MK		TATA-box	TATA	911	4	+	Arabidopsis thaliana	core promoter element around -30 of transcription start
MK		TATA-box	TATTTAAA	937	8	-	Arabidopsis thaliana	core promoter element around -30 of transcription start
MK		TATA-box	TATAAAA	1007	7	-	Pisum sativum	core promoter element around -30 of transcription start
MK		TATA-box	TATAAA	1008	6	-	Helianthus annuus	core promoter element around -30 of transcription start
MK		TATA-box	TATAA	1009	5	-	Arabidopsis thaliana	core promoter element around -30 of transcription start
MK		TATA-box	TATA	1010	4	+	Arabidopsis thaliana	core promoter element around -30 of transcription start
MK		TATA-box	TATAAAA	1192	7	-	Pisum sativum	core promoter element around -30 of transcription start
MK		TATA-box	TATAAA	1193	6	-	Helianthus annuus	core promoter element around -30 of transcription start
MK		TATA-box	TATAA	1194	5	-	Arabidopsis thaliana	core promoter element around -30 of transcription start
MK		TATA-box	TATA	1195	4	+	Arabidopsis thaliana	core promoter element around -30 of transcription start
MK		TATA-box	TATA	1443	4	+	Arabidopsis thaliana	core promoter element around -30 of transcription start
MK		TATA-box	TACAAAA	1502	7	+	Oryza sativa	core promoter element around -30 of transcription start
MK		TATA-box	TATAAAA	1618	7	-	Pisum sativum	core promoter element around -30 of transcription start
MK		TATA-box	TATAAA	1619	6	-	Helianthus annuus	core promoter element around -30 of transcription start
MK		TATA-box	TATAA	1620	5	-	Arabidopsis thaliana	core promoter element around -30 of transcription start
MK		TATA-box	TATA	1621	4	-	Arabidopsis thaliana	core promoter element around -30 of transcription start
MK		TATA-box	ATTATA	1634	6	+	Brassica napus	core promoter element around -30 of transcription start
MK		TATA-box	TATAA	1635	5	-	Arabidopsis thaliana	core promoter element around -30 of transcription start
MK		TATA-box	TATA	1636	4	-	Arabidopsis thaliana	core promoter element around -30 of transcription start
MK		TATA-box	ATATAA	1853	6	+	Brassica oleracea	core promoter element around -30 of transcription start
MK		TATA-box	TATA	1854	4	-	Arabidopsis thaliana	core promoter element around -30 of transcription start
MK		TATA-box	TATA	1900	4	-	Arabidopsis thaliana	core promoter element around -30 of transcription start
MK		TATA-box	TATACA	1904	6	-	Helianthus annuus	core promoter element around -30 of transcription start
MK		TATA-box	TATA	1906	4	-	Arabidopsis thaliana	core promoter element around -30 of transcription start
MK		TATA-box	ATATAT	1937	6	-	Brassica napus	core promoter element around -30 of transcription start
MK		TATA-box	TATA	1938	4	-	Arabidopsis thaliana	core promoter element around -30 of transcription start
MK		TATA-box	ATATAT	1973	6	-	Brassica napus	core promoter element around -30 of transcription start
MK		TATA-box	TATATA	1974	6	-	Arabidopsis thaliana	core promoter element around -30 of transcription start
MK		TATA-box	ATATAT	1975	6	-	Brassica napus	core promoter element around -30 of transcription start
MK		TATA-box	TATA	1976	4	-	Arabidopsis thaliana	core promoter element around -30 of transcription start
MK		TATA-box	ATTATA	2017	6	+	Brassica napus	core promoter element around -30 of transcription start
MK		TATA-box	TATAA	2018	5	-	Arabidopsis thaliana	core promoter element around -30 of transcription start
MK		TATA-box	TATA	2019	4	-	Arabidopsis thaliana	core promoter element around -30 of transcription start
MK		TATA-box	TATAA	2079	5	-	Arabidopsis thaliana	core promoter element around -30 of transcription start
MK		TATA-box	TATA	2080	4	-	Arabidopsis thaliana	core promoter element around -30 of transcription start
MK		TATA-box	TATA	2093	4	-	Arabidopsis thaliana	core promoter element around -30 of transcription start
MK		TATA-box	taTATAAAtc	2151	9	-	Arabidopsis thaliana	core promoter element around -30 of transcription start
MK		TATA-box	ATATAT	2152	6	-	Brassica napus	core promoter element around -30 of transcription start
MK		TATA-box	TATATA	2153	6	-	Arabidopsis thaliana	core promoter element around -30 of transcription start
MK		TATA-box	ATATAT	2154	6	-	Brassica napus	core promoter element around -30 of transcription start
MK		TATA-box	TATATA	2155	6	-	Arabidopsis thaliana	core promoter element around -30 of transcription start
MK		TATA-box	ATATAT	2156	6	-	Brassica napus	core promoter element around -30 of transcription start
MK		TATA-box	TATA	2157	4	-	Arabidopsis thaliana	core promoter element around -30 of transcription start
MK		TATA-box	TACATAAA	2253	8	-	Oryza sativa	core promoter element around -30 of transcription start
MK		TATA-box	TATACA	2289	6	-	Helianthus annuus	core promoter element around -30 of transcription start
MK		TATA-box	TATATA	2291	6	-	Arabidopsis thaliana	core promoter element around -30 of transcription start
MK		TATA-box	ATATAA	2292	6	+	Brassica oleracea	core promoter element around -30 of transcription start
MK		TATA-box	TATA	2293	4	-	Arabidopsis thaliana	core promoter element around -30 of transcription start
MK		TATA-box	TATAAAT	2374	7	-	Brassica juncea	core promoter element around -30 of transcription start
MK		TATA-box	TATAAA	2375	6	-	Helianthus annuus	core promoter element around -30 of transcription start
MK		TATA-box	TATAA	2376	5	-	Arabidopsis thaliana	core promoter element around -30 of transcription start
MK		TATA-box	TATA	2377	4	-	Arabidopsis thaliana	core promoter element around -30 of transcription start
MK		TATA-box	TACAAAA	2408	7	+	Oryza sativa	core promoter element around -30 of transcription start
MK		TATA-box	TATATAA	2491	7	-	Arabidopsis thaliana	core promoter element around -30 of transcription start
MK		TATA-box	TATATA	2492	6	-	Arabidopsis thaliana	core promoter element around -30 of transcription start
MK		TATA-box	ATATAA	2493	6	+	Brassica oleracea	core promoter element around -30 of transcription start
MK		TATA-box	TATA	2494	4	-	Arabidopsis thaliana	core promoter element around -30 of transcription start
MK		TATA-box	TATA	2516	4	-	Arabidopsis thaliana	core promoter element around -30 of transcription start
MK		TATA-box	TACAAAA	2833	7	+	Oryza sativa	core promoter element around -30 of transcription start
MK		TATA-box	ATATAT	2924	6	-	Brassica napus	core promoter element around -30 of transcription start
MK		TATA-box	TATA	2925	4	-	Arabidopsis thaliana	core promoter element around -30 of transcription start
MK		GARE-motif	TCTGTTG	1207	7	+	Brassica oleracea	gibberellin-responsive element
MK		GARE-motif	TCTGTTG	2898	7	+	Brassica oleracea	gibberellin-responsive element
MK		MYB-like sequence	TAACCA	1745	6	-	Arabidopsis thaliana
MK		MYB-like sequence	TAACCA	2116	6	-	Arabidopsis thaliana
MK		F-box	CTATTCTCATT	1823	10	-	Lycopersicon esculentum
MK		AT~TATA-box	TATATA	1974	6	-	Arabidopsis thaliana
MK		AT~TATA-box	TATATA	2153	6	-	Arabidopsis thaliana
MK		AT~TATA-box	TATATA	2155	6	-	Arabidopsis thaliana
MK		AT~TATA-box	TATATA	2291	6	-	Arabidopsis thaliana
MK		AT~TATA-box	TATATA	2492	6	-	Arabidopsis thaliana
MK		MRE	AACCTAA	237	7	+	Petroselinum crispum	MYB binding site involved in light responsiveness
MK		CGTCA-motif	CGTCA	1894	5	-	Hordeum vulgare	cis-acting regulatory element involved in the MeJA-responsiveness
MK		ARE	AAACCA	416	6	-	Zea mays	cis-acting regulatory element essential for the anaerobic induction
MK		ARE	AAACCA	1394	6	+	Zea mays	cis-acting regulatory element essential for the anaerobic induction
MK		ARE	AAACCA	1862	6	-	Zea mays	cis-acting regulatory element essential for the anaerobic induction
MK		ARE	AAACCA	2884	6	+	Zea mays	cis-acting regulatory element essential for the anaerobic induction
MK		AT~TATA-box	TATATAAA	2550	8	-	Arabidopsis thaliana
MK		AT~TATA-box	TATATA	2552	6	-	Arabidopsis thaliana
MK		F-box	CTATTCTCATT	3	10	-	Lycopersicon esculentum
MK		TATA-box	ATATAA	10	6	+	Brassica oleracea	core promoter element around -30 of transcription start
MK		TATA-box	TATA	11	4	+	Arabidopsis thaliana	core promoter element around -30 of transcription start
MK		TATA-box	TATAAA	24	6	-	Helianthus annuus	core promoter element around -30 of transcription start
MK		TATA-box	TATAA	25	5	-	Arabidopsis thaliana	core promoter element around -30 of transcription start
MK		TATA-box	TATA	26	4	+	Arabidopsis thaliana	core promoter element around -30 of transcription start
MK		TATA-box	TATTTAAA	32	8	-	Arabidopsis thaliana	core promoter element around -30 of transcription start
MK		TATA-box	TATTTAAA	53	8	-	Arabidopsis thaliana	core promoter element around -30 of transcription start
MK		TATA-box	ATTATA	120	6	+	Brassica napus	core promoter element around -30 of transcription start
MK		TATA-box	TATAA	121	5	-	Arabidopsis thaliana	core promoter element around -30 of transcription start
MK		TATA-box	TATA	122	4	+	Arabidopsis thaliana	core promoter element around -30 of transcription start
MK		TATA-box	TATA	284	4	+	Arabidopsis thaliana	core promoter element around -30 of transcription start
MK		TATA-box	TATA	301	4	+	Arabidopsis thaliana	core promoter element around -30 of transcription start
MK		TATA-box	TATAAA	308	6	-	Helianthus annuus	core promoter element around -30 of transcription start
MK		TATA-box	TATAA	309	5	-	Arabidopsis thaliana	core promoter element around -30 of transcription start
MK		TATA-box	TATA	310	4	+	Arabidopsis thaliana	core promoter element around -30 of transcription start
MK		TATA-box	TATACA	369	6	-	Helianthus annuus	core promoter element around -30 of transcription start
MK		TATA-box	TATA	371	4	+	Arabidopsis thaliana	core promoter element around -30 of transcription start
MK		TATA-box	TACATAAA	376	8	+	Oryza sativa	core promoter element around -30 of transcription start
MK		TATA-box	TATAAAT	387	7	-	Brassica juncea	core promoter element around -30 of transcription start
MK		TATA-box	TATAAA	388	6	-	Helianthus annuus	core promoter element around -30 of transcription start
MK		TATA-box	TATAA	389	5	-	Arabidopsis thaliana	core promoter element around -30 of transcription start
MK		TATA-box	TATA	390	4	+	Arabidopsis thaliana	core promoter element around -30 of transcription start
MK		TATA-box	ATATAA	544	6	+	Brassica oleracea	core promoter element around -30 of transcription start
MK		TATA-box	TATA	545	4	+	Arabidopsis thaliana	core promoter element around -30 of transcription start
MK		TATA-box	TATACA	571	6	-	Helianthus annuus	core promoter element around -30 of transcription start
MK		TATA-box	TATA	573	4	+	Arabidopsis thaliana	core promoter element around -30 of transcription start
MK		TATA-box	ATTATA	740	6	+	Brassica napus	core promoter element around -30 of transcription start
MK		TATA-box	TATAA	741	5	-	Arabidopsis thaliana	core promoter element around -30 of transcription start
MK		TATA-box	TATA	742	4	+	Arabidopsis thaliana	core promoter element around -30 of transcription start
MK		TATA-box	ATTATA	745	6	+	Brassica napus	core promoter element around -30 of transcription start
MK		TATA-box	TATAA	746	5	-	Arabidopsis thaliana	core promoter element around -30 of transcription start
MK		TATA-box	TATA	747	4	+	Arabidopsis thaliana	core promoter element around -30 of transcription start
MK		TATA-box	TACAAAA	830	7	+	Oryza sativa	core promoter element around -30 of transcription start
MK		TATA-box	TATA	840	4	+	Arabidopsis thaliana	core promoter element around -30 of transcription start
MK		TATA-box	ccTATAAAaa	1072	9	-	Arabidopsis thaliana	core promoter element around -30 of transcription start
MK		TATA-box	TATA	1599	4	-	Arabidopsis thaliana	core promoter element around -30 of transcription start
MK		TATA-box	TATAAAA	1664	7	-	Pisum sativum	core promoter element around -30 of transcription start
MK		TATA-box	TATAAA	1665	6	-	Helianthus annuus	core promoter element around -30 of transcription start
MK		TATA-box	TATAA	1666	5	-	Arabidopsis thaliana	core promoter element around -30 of transcription start
MK		TATA-box	TATA	1667	4	-	Arabidopsis thaliana	core promoter element around -30 of transcription start
MK		TATA-box	ATATAA	1703	6	+	Brassica oleracea	core promoter element around -30 of transcription start
MK		TATA-box	TATA	1704	4	-	Arabidopsis thaliana	core promoter element around -30 of transcription start
MK		TATA-box	TATA	1733	4	-	Arabidopsis thaliana	core promoter element around -30 of transcription start
MK		TATA-box	TACAAAA	1991	7	-	Oryza sativa	core promoter element around -30 of transcription start
MK		TATA-box	TATAAAA	2267	7	-	Pisum sativum	core promoter element around -30 of transcription start
MK		TATA-box	TATAAA	2268	6	-	Helianthus annuus	core promoter element around -30 of transcription start
MK		TATA-box	TATAA	2269	5	-	Arabidopsis thaliana	core promoter element around -30 of transcription start
MK		TATA-box	TATA	2270	4	-	Arabidopsis thaliana	core promoter element around -30 of transcription start
MK		TATA-box	TACAAAA	2276	7	-	Oryza sativa	core promoter element around -30 of transcription start
MK		TATA-box	ATATAA	2464	6	+	Brassica oleracea	core promoter element around -30 of transcription start
MK		TATA-box	TATA	2465	4	-	Arabidopsis thaliana	core promoter element around -30 of transcription start
MK		TATA-box	ATATAA	2519	6	+	Brassica oleracea	core promoter element around -30 of transcription start
MK		TATA-box	TATA	2520	4	-	Arabidopsis thaliana	core promoter element around -30 of transcription start
MK		TATA-box	TATAAAA	2549	7	-	Pisum sativum	core promoter element around -30 of transcription start
MK		TATA-box	TATAAA	2550	6	-	Helianthus annuus	core promoter element around -30 of transcription start
MK		TATA-box	TATATAA	2551	7	-	Arabidopsis thaliana	core promoter element around -30 of transcription start
MK		TATA-box	TATATA	2552	6	-	Arabidopsis thaliana	core promoter element around -30 of transcription start
MK		TATA-box	ATATAA	2553	6	+	Brassica oleracea	core promoter element around -30 of transcription start
MK		TATA-box	TATA	2554	4	-	Arabidopsis thaliana	core promoter element around -30 of transcription start
MK		TATA-box	TATACA	2575	6	-	Helianthus annuus	core promoter element around -30 of transcription start
MK		TATA-box	TATA	2577	4	-	Arabidopsis thaliana	core promoter element around -30 of transcription start
MK		TATA-box	TATA	2655	4	-	Arabidopsis thaliana	core promoter element around -30 of transcription start
MK		TATA-box	TACAAAA	2657	7	+	Oryza sativa	core promoter element around -30 of transcription start
MK		TATA-box	ATATAT	2668	6	-	Brassica napus	core promoter element around -30 of transcription start
MK		TATA-box	TATA	2669	4	-	Arabidopsis thaliana	core promoter element around -30 of transcription start
MK		TATA-box	ATATAA	2677	6	+	Brassica oleracea	core promoter element around -30 of transcription start
MK		TATA-box	TATA	2678	4	-	Arabidopsis thaliana	core promoter element around -30 of transcription start
MK		TATA-box	ATTATA	2692	6	+	Brassica napus	core promoter element around -30 of transcription start
MK		TATA-box	TATAA	2693	5	-	Arabidopsis thaliana	core promoter element around -30 of transcription start
MK		TATA-box	TATA	2694	4	-	Arabidopsis thaliana	core promoter element around -30 of transcription start
MK		TATA-box	TATA	2706	4	-	Arabidopsis thaliana	core promoter element around -30 of transcription start
MK		TATA-box	ATATAT	2742	6	-	Brassica napus	core promoter element around -30 of transcription start
MK		TATA-box	TATA	2743	4	-	Arabidopsis thaliana	core promoter element around -30 of transcription start
MK		TATA-box	TATA	2862	4	-	Arabidopsis thaliana	core promoter element around -30 of transcription start
MK		MYB-like sequence	TAACCA	2105	6	-	Arabidopsis thaliana
MK		TGACG-motif	TGACG	1894	5	+	Hordeum vulgare	cis-acting regulatory element involved in the MeJA-responsiveness
MK		TATA	TATAAAAT	122	8	+	Arabidopsis thaliana
MK		TATA	TATAAAAT	2577	8	+	Arabidopsis thaliana
MK		G-Box	CACGTG	2789	6	-	Pisum sativum	cis-acting regulatory element involved in light responsiveness
MK		G-Box	CACGTT	2843	6	-	Pisum sativum	cis-acting regulatory element involved in light responsiveness
MK		W box	TTGACC	871	6	+	Arabidopsis thaliana
MK		W box	TTGACC	1815	6	+	Arabidopsis thaliana
MK		Myb	TAACTG	438	6	+	Arabidopsis thaliana
MK		Myb	CAACTG	1039	6	+	Arabidopsis thaliana
MK		Myb	CAACTG	1653	6	+	Arabidopsis thaliana
MK		Myb	CAACTG	1962	6	-	Arabidopsis thaliana
MK		Unnamed__4	CTCC	1113	4	+	Petroselinum hortense
MK		Unnamed__4	CTCC	1125	4	+	Petroselinum hortense
MK		Unnamed__4	CTCC	1322	4	+	Petroselinum hortense
MK		Unnamed__4	CTCC	1404	4	-	Petroselinum hortense
MK		Unnamed__4	CTCC	1421	4	-	Petroselinum hortense
MK		Unnamed__4	CTCC	1552	4	-	Petroselinum hortense
MK		Unnamed__4	CTCC	1788	4	+	Petroselinum hortense
MK		Unnamed__4	CTCC	1888	4	+	Petroselinum hortense
MK		Unnamed__4	CTCC	2087	4	-	Petroselinum hortense
MK		Unnamed__4	CTCC	2356	4	-	Petroselinum hortense
MK		Unnamed__4	CTCC	2871	4	+	Petroselinum hortense
MK		Unnamed__4	CTCC	2940	4	+	Petroselinum hortense
MK		ABRE	CACGTG	2789	6	-	Arabidopsis thaliana	cis-acting element involved in the abscisic acid responsiveness
MK		ABRE	ACGTG	2790	5	+	Arabidopsis thaliana	cis-acting element involved in the abscisic acid responsiveness
MK		ABRE	ACGTG	2844	5	+	Arabidopsis thaliana	cis-acting element involved in the abscisic acid responsiveness
MK		P-box	CCTTTTG	2129	7	-	Oryza sativa	gibberellin-responsive element
MK		O2-site	GATGATGTGG	1586	9	-	Zea mays	cis-acting regulatory element involved in zein metabolism regulation
MK		MYC	CATGTG	798	6	-	Arabidopsis thaliana
MK		MYC	CATTTG	1258	6	-	Arabidopsis thaliana
MK		MYC	CATTTG	1398	6	-	Arabidopsis thaliana
MK		MYC	CATGTG	1775	6	-	Arabidopsis thaliana
MK		MYC	CATTTG	2035	6	+	Arabidopsis thaliana
MK		MYC	CAATTG	2986	6	-	Arabidopsis thaliana
MK		GA-motif	ATAGATAA	311	8	+	Arabidopsis thaliana	part of a light responsive element
MK		TCA-element	CCATCTTTTT	1510	10	+	Nicotiana tabacum	cis-acting element involved in salicylic acid responsiveness
MK		AT-rich element	ATAGAAATCAA	2027	10	-	Glycine max	binding site of AT-rich DNA binding protein (ATBP-1)
MK		AT-rich element	ATAGAAATCAA	2752	11	-	Glycine max	binding site of AT-rich DNA binding protein (ATBP-1)
MK		CAAT-box	CAAT	60	4	-	Nicotiana glutinosa
MK		CAAT-box	CAAT	98	4	-	Nicotiana glutinosa
MK		CAAT-box	CAAT	106	4	-	Nicotiana glutinosa
MK		CAAT-box	CCAAT	155	5	-	Arabidopsis thaliana	common cis-acting element in promoter and enhancer regions
MK		CAAT-box	CAAT	214	4	+	Nicotiana glutinosa
MK		CAAT-box	CAAT	395	4	-	Nicotiana glutinosa
MK		CAAT-box	CAAAT	425	5	+	Pisum sativum	common cis-acting element in promoter and enhancer regions
MK		CAAT-box	CAAT	428	4	-	Nicotiana glutinosa
MK		CAAT-box	CAAAT	526	5	+	Pisum sativum	common cis-acting element in promoter and enhancer regions
MK		CAAT-box	CAAT	569	4	-	Nicotiana glutinosa
MK		CAAT-box	CAAT	630	4	-	Nicotiana glutinosa
MK		CAAT-box	CAAAT	648	5	+	Pisum sativum	common cis-acting element in promoter and enhancer regions
MK		CAAT-box	CAAT	736	4	+	Nicotiana glutinosa
MK		CAAT-box	CAAT	865	4	-	Nicotiana glutinosa
MK		CAAT-box	CAAT	906	4	-	Nicotiana glutinosa
MK		CAAT-box	CAAAT	1085	5	-	Pisum sativum	common cis-acting element in promoter and enhancer regions
MK		CAAT-box	CAAAT	1136	5	+	Pisum sativum	common cis-acting element in promoter and enhancer regions
MK		CAAT-box	CAAT	1194	4	-	Nicotiana glutinosa
MK		CAAT-box	CAAT	1207	4	+	Nicotiana glutinosa
MK		CAAT-box	CAAAT	1258	5	+	Pisum sativum	common cis-acting element in promoter and enhancer regions
MK		CAAT-box	CAAT	1347	4	+	Nicotiana glutinosa
MK		CAAT-box	CAAT	1367	4	+	Nicotiana glutinosa
MK		CAAT-box	CAAAT	1398	5	+	Pisum sativum	common cis-acting element in promoter and enhancer regions
MK		CAAT-box	CAAT	1577	4	-	Nicotiana glutinosa
MK		CAAT-box	CAAAT	1612	5	+	Pisum sativum	common cis-acting element in promoter and enhancer regions
MK		CAAT-box	CAAT	1615	4	-	Nicotiana glutinosa
MK		CAAT-box	CAAT	1626	4	+	Nicotiana glutinosa
MK		CAAT-box	CAAT	1690	4	-	Nicotiana glutinosa
MK		CAAT-box	CAAT	1701	4	+	Nicotiana glutinosa
MK		CAAT-box	CAAT	1808	4	-	Nicotiana glutinosa
MK		CAAT-box	CAAAT	1826	5	+	Pisum sativum	common cis-acting element in promoter and enhancer regions
MK		CAAT-box	CAAAT	1853	5	+	Pisum sativum	common cis-acting element in promoter and enhancer regions
MK		CAAT-box	CAAT	1881	4	-	Nicotiana glutinosa
MK		CAAT-box	CAAT	1892	4	-	Nicotiana glutinosa
MK		CAAT-box	CAAT	1899	4	-	Nicotiana glutinosa
MK		CAAT-box	CAAAT	1912	5	-	Pisum sativum	common cis-acting element in promoter and enhancer regions
MK		CAAT-box	CAAAT	1950	5	-	Pisum sativum	common cis-acting element in promoter and enhancer regions
MK		CAAT-box	CAAT	1997	4	-	Nicotiana glutinosa
MK		CAAT-box	CAAAT	2036	5	-	Pisum sativum	common cis-acting element in promoter and enhancer regions
MK		CAAT-box	CCAAT	2054	5	-	Arabidopsis thaliana	common cis-acting element in promoter and enhancer regions
MK		CAAT-box	CAAT	2195	4	-	Nicotiana glutinosa
MK		CAAT-box	CAAT	2214	4	+	Nicotiana glutinosa
MK		CAAT-box	CAAT	2241	4	-	Nicotiana glutinosa
MK		CAAT-box	CAAT	2282	4	-	Nicotiana glutinosa
MK		CAAT-box	CAAAT	2306	5	-	Pisum sativum	common cis-acting element in promoter and enhancer regions
MK		CAAT-box	CAAT	2452	4	+	Nicotiana glutinosa
MK		CAAT-box	CAAAT	2483	5	+	Pisum sativum	common cis-acting element in promoter and enhancer regions
MK		CAAT-box	CAAAT	2504	5	+	Pisum sativum	common cis-acting element in promoter and enhancer regions
MK		CAAT-box	CAAT	2601	4	+	Nicotiana glutinosa
MK		CAAT-box	CAAAT	2613	5	+	Pisum sativum	common cis-acting element in promoter and enhancer regions
MK		CAAT-box	CAAT	2616	4	-	Nicotiana glutinosa
MK		CAAT-box	CAAT	2623	4	+	Nicotiana glutinosa
MK		CAAT-box	CAAT	2628	4	+	Nicotiana glutinosa
MK		CAAT-box	CAAAT	2651	5	+	Pisum sativum	common cis-acting element in promoter and enhancer regions
MK		CAAT-box	CAAAT	2674	5	+	Pisum sativum	common cis-acting element in promoter and enhancer regions
MK		CAAT-box	CAAAT	2746	5	-	Pisum sativum	common cis-acting element in promoter and enhancer regions
MK		CAAT-box	CAAT	2878	4	-	Nicotiana glutinosa
MK		CAAT-box	CAAT	2896	4	-	Nicotiana glutinosa
MK		CAAT-box	CAAT	2929	4	-	Nicotiana glutinosa
MK		CAAT-box	CAAT	2958	4	+	Nicotiana glutinosa
MK		CAAT-box	CAAAT	2964	5	+	Pisum sativum	common cis-acting element in promoter and enhancer regions
MK		CAAT-box	CCAAT	2985	5	+	Arabidopsis thaliana	common cis-acting element in promoter and enhancer regions
MK		CAAT-box	CAAT	2986	4	+	Nicotiana glutinosa
MK		CAAT-box	CCAAT	2988	5	-	Arabidopsis thaliana	common cis-acting element in promoter and enhancer regions
MK		GATA-motif	AAGATAAGATT	2250	10	+	Arabidopsis thaliana	part of a light responsive element
MK		GATA-motif	GATAGGG	2595	7	-	Pisum sativum	part of a light responsive element
MK		MYB	CAACCA	1956	6	-	Arabidopsis thaliana
MK		MYB	TAACCA	2105	6	-	Arabidopsis thaliana
MK		MYB	CAACCA	2749	6	-	Arabidopsis thaliana
MK		MYB	CAACCA	2888	6	+	Arabidopsis thaliana
MK		AAGAA-motif	gGTAAAGAAA	779	9	-	Avena sativa
MK		AAGAA-motif	GAAAGAA	1632	7	+	Avena sativa
MK		Unnamed__1	CGTGG	1324	5	-	Zea mays
MK		Unnamed__1	CGTGG	2788	5	-	Zea mays
MK		Unnamed__1	CGTGG	2845	5	+	Zea mays
MK			motif_sequence	109	4	-	organism	short_function
MK			motif_sequence	433	4	-	organism	short_function
MK			motif_sequence	765	4	-	organism	short_function
MK			motif_sequence	1118	4	+	organism	short_function
MK			motif_sequence	1123	4	+	organism	short_function
MK			motif_sequence	1152	4	+	organism	short_function
MK			motif_sequence	1275	4	-	organism	short_function
MK			motif_sequence	1291	4	+	organism	short_function
MK			motif_sequence	1473	4	+	organism	short_function
MK			motif_sequence	2135	4	-	organism	short_function
MK			motif_sequence	2348	4	-	organism	short_function
MK			motif_sequence	2712	4	+	organism	short_function
MK			motif_sequence	2992	4	-	organism	short_function
MK		Sp1	GGGCGG	1127	6	-	Oryza sativa	light responsive element
MK		MBS	CAACTG	1039	6	+	Arabidopsis thaliana	MYB binding site involved in drought-inducibility
MK		MBS	CAACTG	1653	6	+	Arabidopsis thaliana	MYB binding site involved in drought-inducibility
MK		MBS	CAACTG	1962	6	-	Arabidopsis thaliana	MYB binding site involved in drought-inducibility
MK		GT1-motif	GGTTAAT	996	7	+	Avena sativa	light responsive element
MK		Unnamed__6	taTAAATATct	2862	10	+	Zea mays
MK		G-box	CACGTG	2789	6	-	Arabidopsis thaliana	cis-acting regulatory element involved in light responsiveness
MK		G-box	GCCACGTGGA	2841	9	-	Arabidopsis thaliana	cis-acting regulatory element involved in light responsiveness
MK		WUN-motif	CCATTTCAA	1296	9	+	Nicotiana glutinosa
MK		WUN-motif	AAATTACT	2358	8	-	Nicotiana glutinosa
MK		Box 4	ATTAAT	1237	6	+	Petroselinum crispum	part of a conserved DNA module involved in light responsiveness
MK		Box 4	ATTAAT	1377	6	+	Petroselinum crispum	part of a conserved DNA module involved in light responsiveness
MK		Box 4	ATTAAT	2216	6	-	Petroselinum crispum	part of a conserved DNA module involved in light responsiveness
MK		as-1	TGACG	1894	5	+	Arabidopsis thaliana
MK		ERE	ATTTTAAA	704	8	-	Nicotiana glutinos
MK		ERE	ATTTTAAA	977	8	+	Nicotiana glutinos
MK		ERE	ATTTTAAA	2112	8	-	Nicotiana glutinos
MK		ERE	ATTTTAAA	2392	8	+	Nicotiana glutinos
MECS		W box	TTGACC	2424	6	+	Arabidopsis thaliana
MECS		TATA	TATAAAAT	2616	8	+	Arabidopsis thaliana
MECS		G-Box	CACGTT	118	6	+	Pisum sativum	cis-acting regulatory element involved in light responsiveness
MECS		G-Box	CACGTG	2841	6	-	Pisum sativum	cis-acting regulatory element involved in light responsiveness
MECS		TGACG-motif	TGACG	608	5	-	Hordeum vulgare	cis-acting regulatory element involved in the MeJA-responsiveness
MECS		TGACG-motif	TGACG	1326	5	+	Hordeum vulgare	cis-acting regulatory element involved in the MeJA-responsiveness
MECS		TATA-box	TATA	12	4	+	Arabidopsis thaliana	core promoter element around -30 of transcription start
MECS		TATA-box	ATTATA	221	6	+	Brassica napus	core promoter element around -30 of transcription start
MECS		TATA-box	TATAA	222	5	-	Arabidopsis thaliana	core promoter element around -30 of transcription start
MECS		TATA-box	TATA	223	4	+	Arabidopsis thaliana	core promoter element around -30 of transcription start
MECS		TATA-box	TATA	304	4	+	Arabidopsis thaliana	core promoter element around -30 of transcription start
MECS		TATA-box	ATATAT	805	6	+	Brassica napus	core promoter element around -30 of transcription start
MECS		TATA-box	TATATA	806	6	+	Arabidopsis thaliana	core promoter element around -30 of transcription start
MECS		TATA-box	ATATAA	807	6	+	Brassica oleracea	core promoter element around -30 of transcription start
MECS		TATA-box	TATA	808	4	+	Arabidopsis thaliana	core promoter element around -30 of transcription start
MECS		TATA-box	TATA	908	4	+	Arabidopsis thaliana	core promoter element around -30 of transcription start
MECS		TATA-box	TATAAAA	1172	7	-	Pisum sativum	core promoter element around -30 of transcription start
MECS		TATA-box	TATAAA	1173	6	-	Helianthus annuus	core promoter element around -30 of transcription start
MECS		TATA-box	TATAA	1174	5	-	Arabidopsis thaliana	core promoter element around -30 of transcription start
MECS		TATA-box	TATA	1175	4	+	Arabidopsis thaliana	core promoter element around -30 of transcription start
MECS		TATA-box	ATATAT	1202	6	+	Brassica napus	core promoter element around -30 of transcription start
MECS		TATA-box	TATA	1203	4	+	Arabidopsis thaliana	core promoter element around -30 of transcription start
MECS		TATA-box	ATTATA	1252	6	+	Brassica napus	core promoter element around -30 of transcription start
MECS		TATA-box	TATAA	1253	5	-	Arabidopsis thaliana	core promoter element around -30 of transcription start
MECS		TATA-box	TATA	1254	4	+	Arabidopsis thaliana	core promoter element around -30 of transcription start
MECS		TATA-box	TATA	1263	4	+	Arabidopsis thaliana	core promoter element around -30 of transcription start
MECS		TATA-box	TACAAAA	1430	7	-	Oryza sativa	core promoter element around -30 of transcription start
MECS		TATA-box	TATATAA	1472	7	-	Arabidopsis thaliana	core promoter element around -30 of transcription start
MECS		TATA-box	TATATA	1473	6	+	Arabidopsis thaliana	core promoter element around -30 of transcription start
MECS		TATA-box	ATATAA	1474	6	+	Brassica oleracea	core promoter element around -30 of transcription start
MECS		TATA-box	TATA	1475	4	+	Arabidopsis thaliana	core promoter element around -30 of transcription start
MECS		TATA-box	TACAAAA	1529	7	-	Oryza sativa	core promoter element around -30 of transcription start
MECS		TATA-box	TATACA	1532	6	-	Helianthus annuus	core promoter element around -30 of transcription start
MECS		TATA-box	TATA	1534	4	-	Arabidopsis thaliana	core promoter element around -30 of transcription start
MECS		TATA-box	TATA	1645	4	-	Arabidopsis thaliana	core promoter element around -30 of transcription start
MECS		TATA-box	TATA	1802	4	-	Arabidopsis thaliana	core promoter element around -30 of transcription start
MECS		TATA-box	TATAAA	1819	6	-	Helianthus annuus	core promoter element around -30 of transcription start
MECS		TATA-box	TATAA	1820	5	-	Arabidopsis thaliana	core promoter element around -30 of transcription start
MECS		TATA-box	TATA	1821	4	-	Arabidopsis thaliana	core promoter element around -30 of transcription start
MECS		TATA-box	TATA	2143	4	-	Arabidopsis thaliana	core promoter element around -30 of transcription start
MECS		TATA-box	TATA	2153	4	-	Arabidopsis thaliana	core promoter element around -30 of transcription start
MECS		TATA-box	TATA	2311	4	-	Arabidopsis thaliana	core promoter element around -30 of transcription start
MECS		TATA-box	TATA	2318	4	-	Arabidopsis thaliana	core promoter element around -30 of transcription start
MECS		TATA-box	TATAAA	2510	6	-	Helianthus annuus	core promoter element around -30 of transcription start
MECS		TATA-box	TATAA	2511	5	-	Arabidopsis thaliana	core promoter element around -30 of transcription start
MECS		TATA-box	TATA	2512	4	-	Arabidopsis thaliana	core promoter element around -30 of transcription start
MECS		TATA-box	TATAA	2559	5	-	Arabidopsis thaliana	core promoter element around -30 of transcription start
MECS		TATA-box	TATA	2560	4	-	Arabidopsis thaliana	core promoter element around -30 of transcription start
MECS		TATA-box	TATA	2593	4	-	Arabidopsis thaliana	core promoter element around -30 of transcription start
MECS		TATA-box	TATACA	2614	6	-	Helianthus annuus	core promoter element around -30 of transcription start
MECS		TATA-box	TATA	2616	4	-	Arabidopsis thaliana	core promoter element around -30 of transcription start
MECS		TATA-box	ATATAT	2629	6	-	Brassica napus	core promoter element around -30 of transcription start
MECS		TATA-box	TATA	2630	4	-	Arabidopsis thaliana	core promoter element around -30 of transcription start
MECS		TATA-box	ATATAA	2667	6	+	Brassica oleracea	core promoter element around -30 of transcription start
MECS		TATA-box	TATA	2668	4	-	Arabidopsis thaliana	core promoter element around -30 of transcription start
MECS		TATA-box	TATA	2679	4	-	Arabidopsis thaliana	core promoter element around -30 of transcription start
MECS		TATA-box	TACAAAA	2751	7	-	Oryza sativa	core promoter element around -30 of transcription start
MECS		MYB-like sequence	TAACCA	1375	6	+	Arabidopsis thaliana
MECS		MYB-like sequence	TAACCA	1394	6	+	Arabidopsis thaliana
MECS		AuxRR-core	GGTCCAT	1946	7	-	Nicotiana tabacum	cis-acting regulatory element involved in auxin responsiveness
MECS		AT~TATA-box	TATATA	806	6	+	Arabidopsis thaliana
MECS		AT~TATA-box	TATATA	1473	6	+	Arabidopsis thaliana
MECS		LAMP-element	CTTTATCA	2413	8	+	Pisum sativum	part of a light responsive element
MECS		ARE	AAACCA	1046	6	-	Zea mays	cis-acting regulatory element essential for the anaerobic induction
MECS		ARE	AAACCA	1526	6	-	Zea mays	cis-acting regulatory element essential for the anaerobic induction
MECS		CGTCA-motif	CGTCA	608	5	+	Hordeum vulgare	cis-acting regulatory element involved in the MeJA-responsiveness
MECS		CGTCA-motif	CGTCA	1326	5	-	Hordeum vulgare	cis-acting regulatory element involved in the MeJA-responsiveness
MECS		MYC	CATTTG	5	6	-	Arabidopsis thaliana
MECS		MYC	CATTTG	198	6	-	Arabidopsis thaliana
MECS		MYC	CATGTG	308	6	+	Arabidopsis thaliana
MECS		MYC	CAATTG	870	6	+	Arabidopsis thaliana
MECS		MYC	CATGTG	1055	6	+	Arabidopsis thaliana
MECS		MYC	CATTTG	1159	6	+	Arabidopsis thaliana
MECS		MYC	CATTTG	1267	6	-	Arabidopsis thaliana
MECS		MYC	CATGTG	1512	6	+	Arabidopsis thaliana
MECS		MYC	CATGTG	2033	6	+	Arabidopsis thaliana
MECS		MYC	CATTTG	2449	6	+	Arabidopsis thaliana
MECS		MYC	CAATTG	2776	6	-	Arabidopsis thaliana
MECS		TC-rich repeats	ATTCTCTAAC	1795	9	-	Nicotiana tabacum	cis-acting element involved in defense and stress responsiveness
MECS		GTGGC-motif	GATTCTGTGGC	1738	10	-	Spinacia oleracea	part of a light responsive element
MECS		ABRE	ACGTG	118	5	-	Arabidopsis thaliana	cis-acting element involved in the abscisic acid responsiveness
MECS		ABRE	GCAACGTGTC	2839	9	+	Hordeum vulgare	cis-acting element involved in the abscisic acid responsiveness
MECS		ABRE	CACGTG	2841	6	-	Arabidopsis thaliana	cis-acting element involved in the abscisic acid responsiveness
MECS		ABRE	ACGTG	2842	5	+	Arabidopsis thaliana	cis-acting element involved in the abscisic acid responsiveness
MECS		Myb	CAACTG	383	6	-	Arabidopsis thaliana
MECS		Myb	CAACTG	401	6	-	Arabidopsis thaliana
MECS		Myb	CAACTG	1035	6	+	Arabidopsis thaliana
MECS		Myb	TAACTG	1469	6	-	Arabidopsis thaliana
MECS		Myb	CAACTG	2222	6	-	Arabidopsis thaliana
MECS		Unnamed__4	CTCC	75	4	-	Petroselinum hortense
MECS		Unnamed__4	CTCC	247	4	-	Petroselinum hortense
MECS		Unnamed__4	CTCC	628	4	-	Petroselinum hortense
MECS		Unnamed__4	CTCC	757	4	-	Petroselinum hortense
MECS		Unnamed__4	CTCC	785	4	-	Petroselinum hortense
MECS		Unnamed__4	CTCC	929	4	+	Petroselinum hortense
MECS		Unnamed__4	CTCC	971	4	+	Petroselinum hortense
MECS		Unnamed__4	CTCC	1311	4	+	Petroselinum hortense
MECS		Unnamed__4	CTCC	1493	4	+	Petroselinum hortense
MECS		Unnamed__4	CTCC	1508	4	-	Petroselinum hortense
MECS		Unnamed__4	CTCC	1863	4	-	Petroselinum hortense
MECS		Unnamed__4	CTCC	1982	4	+	Petroselinum hortense
MECS		Unnamed__4	CTCC	2265	4	-	Petroselinum hortense
MECS		Unnamed__4	CTCC	2475	4	-	Petroselinum hortense
MECS		Unnamed__4	CTCC	2537	4	+	Petroselinum hortense
MECS		WRE3	CCACCT	1370	6	+	Pisum sativum
MECS		MBS	CAACTG	383	6	-	Arabidopsis thaliana	MYB binding site involved in drought-inducibility
MECS		MBS	CAACTG	401	6	-	Arabidopsis thaliana	MYB binding site involved in drought-inducibility
MECS		MBS	CAACTG	1035	6	+	Arabidopsis thaliana	MYB binding site involved in drought-inducibility
MECS		MBS	CAACTG	2222	6	-	Arabidopsis thaliana	MYB binding site involved in drought-inducibility
MECS			motif_sequence	75	4	-	organism	short_function
MECS			motif_sequence	391	4	+	organism	short_function
MECS			motif_sequence	509	4	-	organism	short_function
MECS			motif_sequence	550	4	-	organism	short_function
MECS			motif_sequence	725	4	+	organism	short_function
MECS			motif_sequence	801	4	-	organism	short_function
MECS			motif_sequence	875	4	-	organism	short_function
MECS			motif_sequence	901	4	+	organism	short_function
MECS			motif_sequence	940	4	+	organism	short_function
MECS			motif_sequence	969	4	+	organism	short_function
MECS			motif_sequence	1122	4	+	organism	short_function
MECS			motif_sequence	1215	4	+	organism	short_function
MECS			motif_sequence	1318	4	-	organism	short_function
MECS			motif_sequence	1513	4	+	organism	short_function
MECS			motif_sequence	1767	4	-	organism	short_function
MECS			motif_sequence	1771	4	+	organism	short_function
MECS			motif_sequence	1863	4	-	organism	short_function
MECS			motif_sequence	1980	4	+	organism	short_function
MECS			motif_sequence	2135	4	-	organism	short_function
MECS			motif_sequence	2377	4	-	organism	short_function
MECS		Unnamed__1	GCCACGTGGC	2839	9	-	Petunia sp.
MECS		Unnamed__1	CGTGG	2840	5	-	Zea mays
MECS		Myb-binding site	CAACAG	283	6	-	Nicotiana tabacum
MECS		Myb-binding site	CAACAG	1038	6	-	Nicotiana tabacum
MECS		Myb-binding site	CAACAG	1605	6	-	Nicotiana tabacum
MECS		chs-CMA2a	TCACTTGA	2237	8	+	Petroselinum crispum	part of a light responsive element
MECS		MYB	CAACAG	283	6	-	Arabidopsis thaliana
MECS		MYB	CAACAG	1038	6	-	Arabidopsis thaliana
MECS		MYB	TAACCA	1375	6	+	Arabidopsis thaliana
MECS		MYB	TAACCA	1394	6	+	Arabidopsis thaliana
MECS		MYB	CAACAG	1605	6	-	Arabidopsis thaliana
MECS		MYB	CAACCA	1894	6	-	Arabidopsis thaliana
MECS		STRE	AGGGG	1069	5	-	Arabidopsis thaliana
MECS		STRE	AGGGG	1231	5	+	Arabidopsis thaliana
MECS		CAAT-box	CAAAT	5	5	+	Pisum sativum	common cis-acting element in promoter and enhancer regions
MECS		CAAT-box	CAAAT	22	5	+	Pisum sativum	common cis-acting element in promoter and enhancer regions
MECS		CAAT-box	CAAAT	29	5	+	Pisum sativum	common cis-acting element in promoter and enhancer regions
MECS		CAAT-box	CAAAT	57	5	-	Pisum sativum	common cis-acting element in promoter and enhancer regions
MECS		CAAT-box	CAAAT	79	5	-	Pisum sativum	common cis-acting element in promoter and enhancer regions
MECS		CAAT-box	CAAAT	88	5	-	Pisum sativum	common cis-acting element in promoter and enhancer regions
MECS		CAAT-box	CAAAT	198	5	+	Pisum sativum	common cis-acting element in promoter and enhancer regions
MECS		CAAT-box	CAAT	210	4	-	Nicotiana glutinosa
MECS		CAAT-box	CAAT	262	4	-	Nicotiana glutinosa
MECS		CAAT-box	CAAT	359	4	+	Nicotiana glutinosa
MECS		CAAT-box	CAAT	379	4	-	Nicotiana glutinosa
MECS		CAAT-box	CAAT	418	4	+	Nicotiana glutinosa
MECS		CAAT-box	CAAT	502	4	-	Nicotiana glutinosa
MECS		CAAT-box	CCAAT	535	5	+	Arabidopsis thaliana	common cis-acting element in promoter and enhancer regions
MECS		CAAT-box	CAAT	536	4	+	Nicotiana glutinosa
MECS		CAAT-box	CAAT	638	4	-	Nicotiana glutinosa
MECS		CAAT-box	CAAT	651	4	-	Nicotiana glutinosa
MECS		CAAT-box	CAAAT	841	5	-	Pisum sativum	common cis-acting element in promoter and enhancer regions
MECS		CAAT-box	CAAT	870	4	+	Nicotiana glutinosa
MECS		CAAT-box	CAAT	872	4	-	Nicotiana glutinosa
MECS		CAAT-box	CAAT	933	4	-	Nicotiana glutinosa
MECS		CAAT-box	CAAT	989	4	-	Nicotiana glutinosa
MECS		CAAT-box	CAAT	1107	4	+	Nicotiana glutinosa
MECS		CAAT-box	CAAT	1138	4	+	Nicotiana glutinosa
MECS		CAAT-box	CAAAT	1144	5	-	Pisum sativum	common cis-acting element in promoter and enhancer regions
MECS		CAAT-box	CAAAT	1160	5	-	Pisum sativum	common cis-acting element in promoter and enhancer regions
MECS		CAAT-box	CCAAT	1178	5	-	Arabidopsis thaliana	common cis-acting element in promoter and enhancer regions
MECS		CAAT-box	CAAAT	1267	5	+	Pisum sativum	common cis-acting element in promoter and enhancer regions
MECS		CAAT-box	CAAT	1300	4	-	Nicotiana glutinosa
MECS		CAAT-box	CAAT	1341	4	-	Nicotiana glutinosa
MECS		CAAT-box	CAAAT	1405	5	-	Pisum sativum	common cis-acting element in promoter and enhancer regions
MECS		CAAT-box	CAAT	1447	4	+	Nicotiana glutinosa
MECS		CAAT-box	CAAT	1542	4	-	Nicotiana glutinosa
MECS		CAAT-box	CAAT	1620	4	-	Nicotiana glutinosa
MECS		CAAT-box	CAAT	1694	4	-	Nicotiana glutinosa
MECS		CAAT-box	CAAT	1704	4	-	Nicotiana glutinosa
MECS		CAAT-box	CAAT	1723	4	+	Nicotiana glutinosa
MECS		CAAT-box	CAAAT	2026	5	-	Pisum sativum	common cis-acting element in promoter and enhancer regions
MECS		CAAT-box	CAAT	2092	4	-	Nicotiana glutinosa
MECS		CAAT-box	CAAT	2156	4	-	Nicotiana glutinosa
MECS		CAAT-box	CAAT	2160	4	-	Nicotiana glutinosa
MECS		CAAT-box	CAAT	2303	4	+	Nicotiana glutinosa
MECS		CAAT-box	CAAT	2385	4	-	Nicotiana glutinosa
MECS		CAAT-box	CAAT	2423	4	-	Nicotiana glutinosa
MECS		CAAT-box	CAAT	2434	4	-	Nicotiana glutinosa
MECS		CAAT-box	CAAT	2438	4	-	Nicotiana glutinosa
MECS		CAAT-box	CAAAT	2450	5	-	Pisum sativum	common cis-acting element in promoter and enhancer regions
MECS		CAAT-box	CAAT	2533	4	-	Nicotiana glutinosa
MECS		CAAT-box	CAAT	2543	4	+	Nicotiana glutinosa
MECS		CAAT-box	CAAT	2642	4	+	Nicotiana glutinosa
MECS		CAAT-box	CAAT	2776	4	+	Nicotiana glutinosa
MECS		CAAT-box	CAAT	2778	4	-	Nicotiana glutinosa
MECS		CAAT-box	CAAT	2812	4	+	Nicotiana glutinosa
MECS		CAAT-box	CAAT	2836	4	-	Nicotiana glutinosa
MECS		CAAT-box	CAAAT	2861	5	+	Pisum sativum	common cis-acting element in promoter and enhancer regions
MECS		CAAT-box	CAAAT	2942	5	+	Pisum sativum	common cis-acting element in promoter and enhancer regions
MECS		AT-rich element	ATAGAAATCAA	962	10	-	Glycine max	binding site of AT-rich DNA binding protein (ATBP-1)
MECS		TCA-element	CCATCTTTTT	1225	9	-	Nicotiana tabacum	cis-acting element involved in salicylic acid responsiveness
MECS		AE-box	AGAAACAA	993	8	-	Arabidopsis thaliana	part of a module for light response
MECS		Myc	TCTCTTA	1579	7	+	Arabidopsis thaliana
MECS		TATC-box	TATCCCA	1804	7	+	Oryza sativa	cis-acting element involved in gibberellin-responsiveness
MECS		as-1	TGACG	608	5	-	Arabidopsis thaliana
MECS		as-1	TGACG	1326	5	+	Arabidopsis thaliana
MECS		Box 4	ATTAAT	1564	6	-	Petroselinum crispum	part of a conserved DNA module involved in light responsiveness
MECS		WUN-motif	AAATTACT	596	8	-	Nicotiana glutinosa
MECS		ATC-motif	AGTAATCT	978	8	-	Spinacia oleracea	part of a conserved DNA module involved in light responsiveness
MECS		G-box	CACGAC	136	6	-	Zea mays	cis-acting regulatory element involved in light responsiveness
MECS		G-box	TAACACGTAG	681	9	-	Brassica oleracea	cis-acting regulatory element involved in light responsiveness
MECS		G-box	tgACACGTGGCA	2838	11	-	Lycopersicon esculentum	cis-acting regulatory element involved in light responsiveness
MECS		G-box	ACACGTGGC	2839	9	-	Brassica napus	cis-acting regulatory element involved in light responsiveness
MECS		G-box	CACGTG	2841	6	-	Arabidopsis thaliana	cis-acting regulatory element involved in light responsiveness
MECS		GT1-motif	GGTTAAT	1392	7	-	Avena sativa	light responsive element
MECS		GT1-motif	GGTTAA	1393	6	-	Arabidopsis thaliana	light responsive element
MDC		circadian	CAAAGATATC	597	9	-	Lycopersicon esculentum	cis-acting regulatory element involved in circadian control
MDC		GT1-motif	GGTTAA	1510	6	+	Arabidopsis thaliana	light responsive element
MDC		GT1-motif	GGTTAA	2472	6	-	Arabidopsis thaliana	light responsive element
MDC		G-box	CACGTC	447	6	-	Zea mays	cis-acting regulatory element involved in light responsiveness
MDC		G-box	TAAACGTG	2630	8	-	Brassica oleracea	cis-acting regulatory element involved in light responsiveness
MDC		CARE	CAACTCCC	560	8	-	Oryza sativa
MDC		CARE	CAACTCAC	2356	8	+	Oryza sativa
MDC		as-1	TGACG	1001	5	+	Arabidopsis thaliana
MDC		as-1	TGACG	1625	5	-	Arabidopsis thaliana
MDC		AAGAA-motif	GAAAGAA	61	7	+	Avena sativa
MDC		AAGAA-motif	GAAAGAA	2375	7	-	Avena sativa
MDC		WRE3	CCACCT	24	6	-	Pisum sativum
MDC		WRE3	CCACCT	143	6	-	Pisum sativum
MDC		MBS	CAACTG	1148	6	-	Arabidopsis thaliana	MYB binding site involved in drought-inducibility
MDC		MBS	CAACTG	2211	6	-	Arabidopsis thaliana	MYB binding site involved in drought-inducibility
MDC		ABRE	ACGTG	448	5	+	Arabidopsis thaliana	cis-acting element involved in the abscisic acid responsiveness
MDC		ABRE	ACGTG	2630	5	-	Arabidopsis thaliana	cis-acting element involved in the abscisic acid responsiveness
MDC		Unnamed__4	CTCC	430	4	+	Petroselinum hortense
MDC		Unnamed__4	CTCC	548	4	-	Petroselinum hortense
MDC		Unnamed__4	CTCC	561	4	-	Petroselinum hortense
MDC		Unnamed__4	CTCC	620	4	+	Petroselinum hortense
MDC		Unnamed__4	CTCC	800	4	+	Petroselinum hortense
MDC		Unnamed__4	CTCC	1129	4	-	Petroselinum hortense
MDC		Unnamed__4	CTCC	1389	4	+	Petroselinum hortense
MDC		Unnamed__4	CTCC	1482	4	+	Petroselinum hortense
MDC		Unnamed__4	CTCC	1704	4	+	Petroselinum hortense
MDC		Unnamed__4	CTCC	1785	4	+	Petroselinum hortense
MDC		Unnamed__4	CTCC	1951	4	-	Petroselinum hortense
MDC		Unnamed__4	CTCC	1966	4	-	Petroselinum hortense
MDC		Unnamed__4	CTCC	1970	4	-	Petroselinum hortense
MDC		Unnamed__4	CTCC	2662	4	-	Petroselinum hortense
MDC		Unnamed__4	CTCC	2791	4	-	Petroselinum hortense
MDC		Unnamed__4	CTCC	2795	4	-	Petroselinum hortense
MDC		I-box	AGATAAGG	188	8	+	Triticum aestivum	part of a light responsive element
MDC		GCN4_motif	TGAGTCA	217	7	-	Oryza sativa	cis-regulatory element involved in endosperm expression
MDC		A-box	CCGTCC	2180	6	+	Petroselinum crispum	cis-acting regulatory element
MDC		A-box	CCGTCC	2393	6	-	Petroselinum crispum	cis-acting regulatory element
MDC		A-box	CCGTCC	2805	6	-	Petroselinum crispum	cis-acting regulatory element
MDC		O2-site	GATGACATGG	195	9	+	Zea mays	cis-acting regulatory element involved in zein metabolism regulation
MDC		CCGTCC motif	CCGTCC	2180	6	+	Nicotiana tabacum
MDC		CCGTCC motif	CCGTCC	2393	6	-	Nicotiana tabacum
MDC		CCGTCC motif	CCGTCC	2805	6	-	Nicotiana tabacum
MDC		CCAAT-box	CAACGG	778	6	-	Hordeum vulgare	MYBHv1 binding site
MDC		CAG-motif	GAAAGGCAGAC	1551	10	-	Arabidopsis thaliana	part of a light response element
MDC		ARE	AAACCA	319	6	-	Zea mays	cis-acting regulatory element essential for the anaerobic induction
MDC		ARE	AAACCA	1043	6	+	Zea mays	cis-acting regulatory element essential for the anaerobic induction
MDC		ARE	AAACCA	2242	6	+	Zea mays	cis-acting regulatory element essential for the anaerobic induction
MDC		MYB-like sequence	TAACCA	1509	6	-	Arabidopsis thaliana
MDC		MYB-like sequence	TAACCA	1673	6	+	Arabidopsis thaliana
MDC		MYB-like sequence	TAACCA	2294	6	-	Arabidopsis thaliana
MDC		AT~TATA-box	TATATA	16	6	+	Arabidopsis thaliana
MDC		Box 4	ATTAAT	1722	6	-	Petroselinum crispum	part of a conserved DNA module involved in light responsiveness
MDC		Box 4	ATTAAT	2332	6	-	Petroselinum crispum	part of a conserved DNA module involved in light responsiveness
MDC		CTAG-motif	ACTAGCAGAA	2097	9	-	Avena sativa
MDC		WUN-motif	CAATTACAT	175	9	-	Nicotiana glutinosa
MDC		WUN-motif	AAATTTCTT	1540	9	+	Nicotiana glutinosa
MDC		CAT-box	GCCACT	989	6	+	Arabidopsis thaliana	cis-acting regulatory element related to meristem expression
MDC		CAT-box	GCCACT	1342	6	+	Arabidopsis thaliana	cis-acting regulatory element related to meristem expression
MDC		STRE	AGGGG	1963	5	+	Arabidopsis thaliana
MDC		MYB	CAACCA	157	6	-	Arabidopsis thaliana
MDC		MYB	CAACCA	205	6	-	Arabidopsis thaliana
MDC		MYB	CAACAG	277	6	-	Arabidopsis thaliana
MDC		MYB	CAACAG	1124	6	-	Arabidopsis thaliana
MDC		MYB	TAACCA	1509	6	-	Arabidopsis thaliana
MDC		MYB	TAACCA	1673	6	+	Arabidopsis thaliana
MDC		MYB	TAACCA	2294	6	-	Arabidopsis thaliana
MDC		MYB	CAACAG	2977	6	+	Arabidopsis thaliana
MDC		AT-rich element	ATAGAAATCAA	2130	10	-	Glycine max	binding site of AT-rich DNA binding protein (ATBP-1)
MDC		CAAT-box	CAAAT	34	5	+	Pisum sativum	common cis-acting element in promoter and enhancer regions
MDC		CAAT-box	CAAT	104	4	+	Nicotiana glutinosa
MDC		CAAT-box	CAAT	138	4	-	Nicotiana glutinosa
MDC		CAAT-box	CCAAT	155	5	-	Arabidopsis thaliana	common cis-acting element in promoter and enhancer regions
MDC		CAAT-box	CAAT	180	4	-	Nicotiana glutinosa
MDC		CAAT-box	CAAT	251	4	+	Nicotiana glutinosa
MDC		CAAT-box	CAAT	258	4	-	Nicotiana glutinosa
MDC		CAAT-box	CCAAT	272	5	-	Arabidopsis thaliana	common cis-acting element in promoter and enhancer regions
MDC		CAAT-box	CAAT	483	4	-	Nicotiana glutinosa
MDC		CAAT-box	CAAT	535	4	+	Nicotiana glutinosa
MDC		CAAT-box	CAAT	700	4	-	Nicotiana glutinosa
MDC		CAAT-box	CAAT	706	4	-	Nicotiana glutinosa
MDC		CAAT-box	CAAAT	792	5	+	Pisum sativum	common cis-acting element in promoter and enhancer regions
MDC		CAAT-box	CAAT	817	4	+	Nicotiana glutinosa
MDC		CAAT-box	CCAAT	836	5	+	Arabidopsis thaliana	common cis-acting element in promoter and enhancer regions
MDC		CAAT-box	CAAT	837	4	+	Nicotiana glutinosa
MDC		CAAT-box	CAAAT	865	5	+	Pisum sativum	common cis-acting element in promoter and enhancer regions
MDC		CAAT-box	CAAAT	879	5	-	Pisum sativum	common cis-acting element in promoter and enhancer regions
MDC		CAAT-box	CAAT	885	4	-	Nicotiana glutinosa
MDC		CAAT-box	CCAAT	947	5	+	Arabidopsis thaliana	common cis-acting element in promoter and enhancer regions
MDC		CAAT-box	CAAT	948	4	+	Nicotiana glutinosa
MDC		CAAT-box	CAAT	984	4	+	Nicotiana glutinosa
MDC		CAAT-box	CAAT	1018	4	-	Nicotiana glutinosa
MDC		CAAT-box	CAAT	1114	4	-	Nicotiana glutinosa
MDC		CAAT-box	CAAAT	1118	5	+	Pisum sativum	common cis-acting element in promoter and enhancer regions
MDC		CAAT-box	CAAAT	1159	5	-	Pisum sativum	common cis-acting element in promoter and enhancer regions
MDC		CAAT-box	CAAT	1172	4	+	Nicotiana glutinosa
MDC		CAAT-box	CAAT	1212	4	+	Nicotiana glutinosa
MDC		CAAT-box	CAAAT	1244	5	-	Pisum sativum	common cis-acting element in promoter and enhancer regions
MDC		CAAT-box	CAAT	1357	4	+	Nicotiana glutinosa
MDC		CAAT-box	CAAAT	1411	5	+	Pisum sativum	common cis-acting element in promoter and enhancer regions
MDC		CAAT-box	CAAT	1430	4	+	Nicotiana glutinosa
MDC		CAAT-box	CAAT	1506	4	+	Nicotiana glutinosa
MDC		CAAT-box	CCAAT	1706	5	+	Arabidopsis thaliana	common cis-acting element in promoter and enhancer regions
MDC		CAAT-box	CAAT	1707	4	+	Nicotiana glutinosa
MDC		CAAT-box	CAAT	1820	4	+	Nicotiana glutinosa
MDC		CAAT-box	CAAAT	1847	5	-	Pisum sativum	common cis-acting element in promoter and enhancer regions
MDC		CAAT-box	CAAT	1942	4	+	Nicotiana glutinosa
MDC		CAAT-box	CCAAT	1948	5	-	Arabidopsis thaliana	common cis-acting element in promoter and enhancer regions
MDC		CAAT-box	CAAT	1992	4	+	Nicotiana glutinosa
MDC		CAAT-box	CAAT	2093	4	-	Nicotiana glutinosa
MDC		CAAT-box	CAAT	2123	4	-	Nicotiana glutinosa
MDC		CAAT-box	CAAAT	2128	5	-	Pisum sativum	common cis-acting element in promoter and enhancer regions
MDC		CAAT-box	CAAT	2147	4	-	Nicotiana glutinosa
MDC		CAAT-box	CCAAT	2185	5	+	Arabidopsis thaliana	common cis-acting element in promoter and enhancer regions
MDC		CAAT-box	CAAT	2186	4	+	Nicotiana glutinosa
MDC		CAAT-box	CAAT	2229	4	+	Nicotiana glutinosa
MDC		CAAT-box	CAAT	2307	4	-	Nicotiana glutinosa
MDC		CAAT-box	CAAAT	2329	5	+	Pisum sativum	common cis-acting element in promoter and enhancer regions
MDC		CAAT-box	CAAT	2363	4	+	Nicotiana glutinosa
MDC		CAAT-box	CAAAT	2523	5	-	Pisum sativum	common cis-acting element in promoter and enhancer regions
MDC		CAAT-box	CAAT	2743	4	-	Nicotiana glutinosa
MDC		CAAT-box	CAAT	2818	4	+	Nicotiana glutinosa
MDC		CAAT-box	CAAAT	2864	5	+	Pisum sativum	common cis-acting element in promoter and enhancer regions
MDC		CAAT-box	CAAT	2892	4	+	Nicotiana glutinosa
MDC		CAAT-box	CAAT	2928	4	-	Nicotiana glutinosa
MDC		CAAT-box	CAAAT	2934	5	-	Pisum sativum	common cis-acting element in promoter and enhancer regions
MDC		GATA-motif	GATAGGA	2869	7	-	Arabidopsis thaliana	part of a light responsive element
MDC		AE-box	AGAAACTT	711	8	-	Arabidopsis thaliana	part of a module for light response
MDC		TCT-motif	TCTTAC	2006	6	+	Arabidopsis thaliana	part of a light responsive element
MDC			motif_sequence	94	4	-	organism	short_function
MDC			motif_sequence	186	4	-	organism	short_function
MDC			motif_sequence	527	4	+	organism	short_function
MDC			motif_sequence	722	4	-	organism	short_function
MDC			motif_sequence	766	4	-	organism	short_function
MDC			motif_sequence	798	4	+	organism	short_function
MDC			motif_sequence	803	4	+	organism	short_function
MDC			motif_sequence	868	4	+	organism	short_function
MDC			motif_sequence	1129	4	-	organism	short_function
MDC			motif_sequence	1678	4	+	organism	short_function
MDC			motif_sequence	2616	4	+	organism	short_function
MDC			motif_sequence	2795	4	-	organism	short_function
MDC		Unnamed__1	CGTGG	449	5	+	Zea mays
MDC		Unnamed__1	CGTGG	2801	5	-	Zea mays
MDC		Myb-binding site	CAACAG	277	6	-	Nicotiana tabacum
MDC		Myb-binding site	CAACAG	1124	6	-	Nicotiana tabacum
MDC		Myb-binding site	CAACAG	2977	6	+	Nicotiana tabacum
MDC		DRE core	GCCGAC	1835	6	-	Arabidopsis thaliana
MDC		DRE core	GCCGAC	2020	6	-	Arabidopsis thaliana
MDC		TCCC-motif	TCTCCCT	2793	7	-	Spinacia oleracea	part of a light responsive element
MDC		MYB recognition site	CCGTTG	778	6	+	Arabidopsis thaliana
MDC		Myb	TAACTG	830	6	-	Arabidopsis thaliana
MDC		Myb	CAACTG	1148	6	-	Arabidopsis thaliana
MDC		Myb	TAACTG	1513	6	+	Arabidopsis thaliana
MDC		Myb	CAACTG	2211	6	-	Arabidopsis thaliana
MDC		TCA	TCATCTTCAT	1	9	-	Pisum sativum
MDC		TCA	TCATCTTCAT	580	9	-	Pisum sativum
MDC		MYC	CATTTG	34	6	-	Arabidopsis thaliana
MDC		MYC	CATTTG	2522	6	+	Arabidopsis thaliana
MDC		MYC	CATGTG	2613	6	-	Arabidopsis thaliana
MDC		MYC	CATGTG	2644	6	-	Arabidopsis thaliana
MDC		MYC	CATTTG	2933	6	+	Arabidopsis thaliana
MDC		AC-I	GCTTACCTACCA	2219	11	+	Arabidopsis thaliana
MDC		ATCT-motif	AATCTAATCC	660	9	-	Pisum sativum	part of a conserved DNA module involved in light responsiveness
MDC		CGTCA-motif	CGTCA	1001	5	-	Hordeum vulgare	cis-acting regulatory element involved in the MeJA-responsiveness
[truncated: 5,297 more rows]
